# Supplementary material for: Asymmetric cycloisomerization/[3 + 2] cycloaddition for the synthesis of chiral spiroisobenzofuran-1,3′-pyrrolidine derivatives
Source: Royal Society of Chemistry journal article supplement (doi:10.1039/d1qo01194d), 2021-01-01
Supplement: d1qo01194d1.pdf [file d1qo01194d1.pdf]

# Asymmetric cycloisomerization/[3+2] cycloaddition for synthesis of chiral spiroisobenzofuran-1,3'-pyrrolidine derivatives

Pei Dong,<sup>a</sup> Long Chen,<sup>a</sup> Zhendong Yang,<sup>a</sup> Shunxi Dong,<sup>\*a</sup> and Xiaoming Feng<sup>\*a</sup>

*Key Laboratory of Green Chemistry & Technology, Ministry of Education, College of Chemistry,*

*Sichuan University, Chengdu 610064, China*

*E-mail: dongs@scu.edu.cn; xmfeng@scu.edu.cn*

## Content

|                                                                                                   |    |
|---------------------------------------------------------------------------------------------------|----|
| (A) General information .....                                                                     | 2  |
| (B) General procedures for the preparation of Au(I) catalyst and chiral <i>N,N'</i> -dioxide..... | 2  |
| (C) General procedures for the preparation of substrates .....                                    | 2  |
| (D) Experimental procedures .....                                                                 | 3  |
| (E) Optimization of the reaction conditions .....                                                 | 4  |
| (F) Control experiments .....                                                                     | 10 |
| (G) Unsuccessful substrates .....                                                                 | 10 |
| (H) Experimental procedure for the scale-up reaction.....                                         | 11 |
| (I) X-ray crystal structure of product.....                                                       | 11 |
| (J) Spectral characterization data for the products.....                                          | 14 |
| (K) Copies of NMR spectra for the products .....                                                  | 35 |
| (L) Copies of CD spectra.....                                                                     | 58 |
| (M) Supplementary reference .....                                                                 | 68 |

## (A) General information

$^1\text{H}$  NMR spectra were recorded on a Bruker ASCEND<sup>TM</sup> 400M (400MHz) in  $\text{CDCl}_3$ . Chemical shifts were reported in ppm from tetramethylsilane with the solvent resonance as the internal standard ( $\text{CDCl}_3$ ,  $\delta = 7.26$ ). Spectra were reported as follows: chemical shift ( $\delta$  ppm), multiplicity (s = singlet, d = doublet, t = triplet, q = quartet, m = multiplet), coupling constants (Hz), integration and assignment.  $^{13}\text{C}\{^1\text{H}\}$  NMR spectra were collected on a Bruker ASCEND<sup>TM</sup> 400M (100MHz) with complete proton decoupling. Chemical shifts are reported in ppm from the tetramethylsilane with the solvent resonance as internal standard ( $\text{CDCl}_3$ ,  $\delta = 77.0$ ). High-resolution mass spectra (HRMS) were performed on Thermo Q-Exactive Focus (FTMS+c ESI) and data were reported as (m/z). Enantiomeric excess (ee) was determined by HPLC analysis using the corresponding commercially chiral column as stated in the experimental procedures at 23 °C with UV detector. Infrared spectra (IR) were recorded on Bruker Tensor II spectrometer with Plantium ATR accessory and the peaks are reported as absorption maxima ( $\nu$ ,  $\text{cm}^{-1}$ ). Optical rotations were measured with a Perkin-Elmer model 241 polarimeter and reported as follows:  $[\alpha]_{\lambda}^T$  (c: g/100 mL, in DCM,  $\lambda$ ). Commercially available reagents were used without further purification. Molecular sieves were activated at 500 °C for 5 h, then cooled and stored under  $\text{N}_2$  atmosphere. All the imines were prepared according to literature.<sup>1</sup> 1,2-dichlorobenzene was dried with  $\text{CaCl}_2$ , and distilled according to *Purification of Laboratory Chemicals* (Fifth Edition).  $\text{CH}_3\text{CCl}_3$ ,  $\text{CH}_2\text{ClCH}_2\text{Cl}$ ,  $\text{CHCl}_3$ ,  $\text{CHCl}_2\text{CHCl}_2$ ,  $\text{Et}_2\text{O}$ ,  $\text{PhCH}_3$  and  $\text{PhCl}$  were directly distilled before use. Chromatography: Silica gel (HG/T2354-2010) made in Qingdao Haiyang Chemical Co., Ltd.

## (B) General procedures for the preparation of Au(I) catalyst and chiral $N,N'$ -dioxide

### 1. Preparation of $\text{PPh}_3\text{AuNTf}_2$

An oven-dried test tube was charged with  $\text{PPh}_3\text{AuCl}$  (355 mg, 0.5 mmol) and  $\text{AgNTf}_2$  (1.05 equiv) under  $\text{N}_2$  atmosphere, then  $\text{CH}_2\text{Cl}_2$  (0.25 mL) was added and it was stirred for 5 h at 35 °C. After filtration over celite to remove the silver chloride salt, the  $\text{PPh}_3\text{AuNTf}_2$  was obtained quantitatively by evaporation of and stored under  $\text{N}_2$  atmosphere.

### 2. Preparation of chiral $N,N'$ -dioxide

The  $N,N'$ -dioxide ligands were prepared by the similar procedure in the literatures.<sup>2</sup>

## (C) General procedures for the preparation of substrates

### 1. Preparation of aziridines

All the aziridines were prepared according to the literature.<sup>3</sup>

### 2. Preparation of alkynyl alcohols and amides

All the alkynyl alcohols and amides were prepared according to the literature.<sup>4</sup>

## (D) Experimental procedures

### 1. Preparation of the racemates

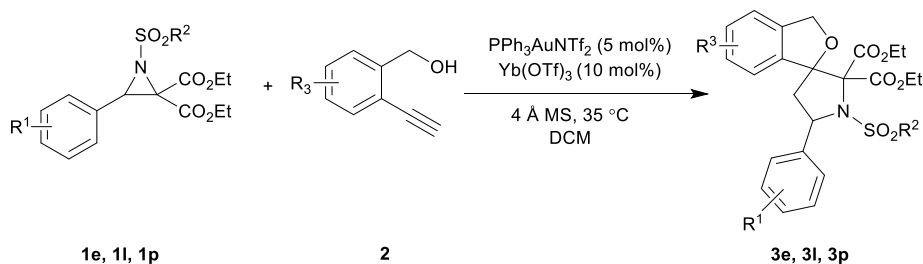

Preparation of the racemates of **3e, 3i, 3p**: Yb(OTf)<sub>3</sub> (10 mol%, 6.1 mg), PPh<sub>3</sub>AuNTf<sub>2</sub> (5 mol%, 3.6 mg) and 4 Å MS (80 mg) were flushed with argon and dissolved in DCM (1.0 mL) at 35 °C, then aziridine **1** (0.1 mmol) and alkynyl alcohol **2** (0.1 mmol) were slowly added and stirred for 2–16 h. The reaction mixture was subjected to flash column chromatography on silica gel and eluted with petroleum ether/ethyl acetate (5:1, v/v) to afford the desired product **3**.

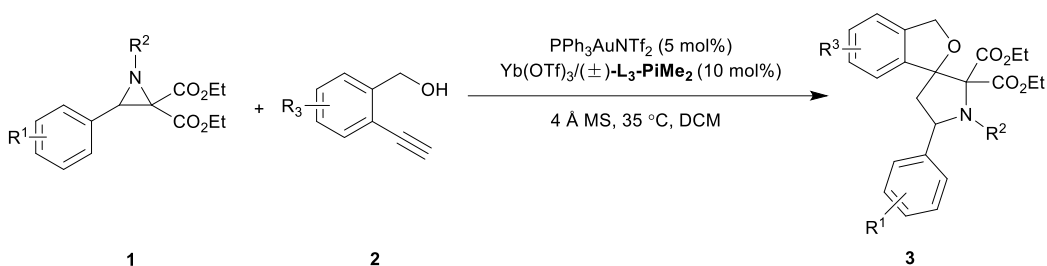

Preparation of other racemates: Yb(OTf)<sub>3</sub> (10 mol%, 6.1 mg), (±)-L<sub>3</sub>-PiMe<sub>2</sub> (10% mol), PPh<sub>3</sub>AuNTf<sub>2</sub> (5 mol%, 3.6 mg) and 4 Å MS (80 mg) were flushed with argon and dissolved in DCM (1.0 mL) at 35 °C for 0.5 h, then aziridine **1** (0.1 mmol) and alkynyl alcohol **2** (0.1 mmol) were slowly added and stirred for 2–16 h. The residue was subjected to flash column chromatography on silica gel and eluted with petroleum ether/ethyl acetate (8:1–4:1, v/v) to afford the desired product.

### 2. General procedures for the catalytic asymmetric reaction

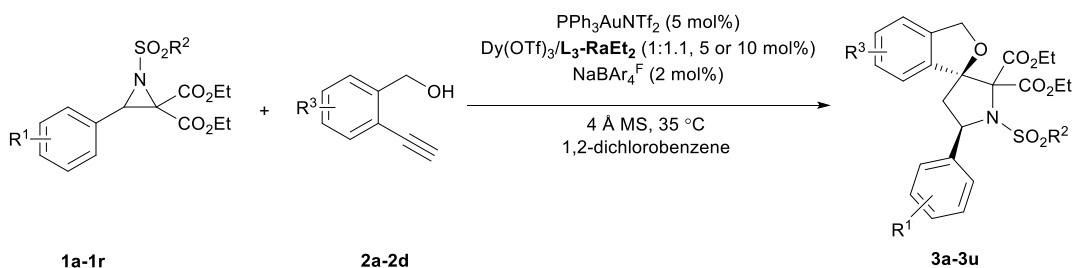

PPh<sub>3</sub>AuNTf<sub>2</sub> (5 mol%), Dy(OTf)<sub>3</sub>/L<sub>3</sub>-RaEt<sub>2</sub> (5 or 10 mol%), NaBAR<sub>4</sub>F (2% mol) and 4 Å MS (100 mg) were stirred in 1,2-dichlorobenzene (3.0 mL) at 35 °C for 0.5 h under nitrogen atmosphere. Subsequently, aziridine **1** (0.1 mmol) and alkynyl alcohol **2** were added. The reaction was stirred at 35 °C and monitored by TLC. The reaction mixture was directly purified by flash chromatography on silica gel (eluent: petroleum ether/diethyl ether = 4:1–8:1) to afford the desired product **3**. The ee values were determined by high-performance liquid chromatography (HPLC) with Chiralcel AD-H, ASH, IF. The dr values were determined by <sup>1</sup>H NMR spectroscopy.

## (E) Optimization of the reaction conditions

**Table S1. Screening of temperature**

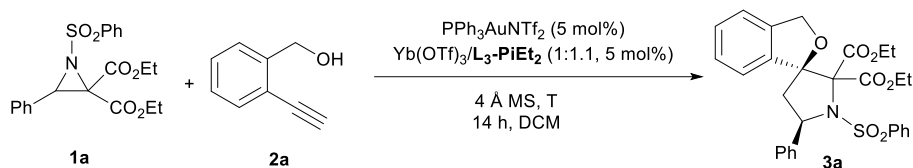

| Entry <sup>a</sup> | t (°C) | Yield (%) <sup>b</sup> | d.r. <sup>c</sup> | ee (%) <sup>c</sup> |
|--------------------|--------|------------------------|-------------------|---------------------|
| 1                  | 0      | 21                     | 60:40             | 27/31               |
| 2                  | 10     | 30                     | 64:36             | 31/37               |
| 3                  | 20     | 42                     | 67:34             | 47/41               |
| 4                  | 35     | 57                     | 75:25             | 51/47               |

<sup>a</sup> Unless otherwise noted, all reactions were performed with **1a** (0.1 mmol), **2a** (0.1 mmol),  $\text{Ph}_3\text{PAuNTf}_2$  (2.5 mol %),  $\text{Dy}(\text{OTf})_3/\text{L}_3\text{-RaEt}_2$  (1:1, 5 mol %), 4 Å MS (80 mg) in solvent (3.0 mL) at 35 °C under  $\text{N}_2$  for 14 h. <sup>b</sup> Isolated yield. <sup>c</sup> Determined by HPLC analysis using a chiral stationary phase.

**Table S2. Screening of solvents**

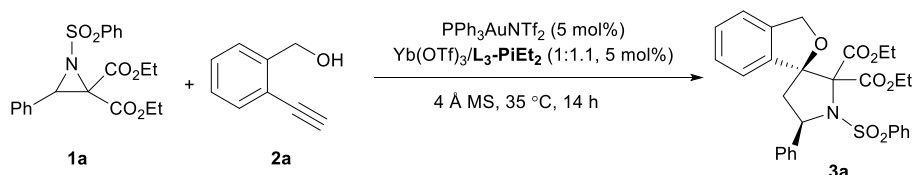

| Entry <sup>a</sup> | Solvent                   | Yield (%) <sup>b</sup> | d.r. <sup>c</sup> | ee (%) <sup>c</sup> |
|--------------------|---------------------------|------------------------|-------------------|---------------------|
| 1                  | Et <sub>2</sub> O         | 53                     | 82:16             | 34/57               |
| 2                  | EtOAc                     | 77                     | 45:55             | 23/31               |
| 3                  | THF                       | 28                     | 47:53             | 52/34               |
| 4                  | toluene                   | 96                     | 71:29             | 53/32               |
| 5                  | DCM                       | 57                     | 75:25             | 51/47               |
| 6                  | DCE                       | 67                     | 80:20             | 47/57               |
| 7                  | 1,1,1-trichloroethane     | 64                     | 78:22-            | 64/49               |
| 8                  | 1,1,2-trichloroethane     | 68                     | 51:49             | 58/56               |
| 9                  | 1,1,2,2-tetrachloroethane | 78                     | 63:37             | 57/49               |
| 10                 | chlorobenzene             | 58                     | 75:25             | 69/69               |
| 11                 | 1,2-dichlorobenzene       | 31                     | 71:29             | 77/62               |
| 12                 | 1,3-dichlorobenzene       | 41                     | 67:23             | 71/55               |
| 13                 | 1,2,4-trichlorobenzene    | 43                     | 72:28             | 77/74               |

<sup>a</sup> Unless otherwise noted, all reactions were performed with **1a** (0.1 mmol), **2a** (0.10 mmol),  $\text{Ph}_3\text{PAuNTf}_2$  (2.5 mol %),  $\text{Dy}(\text{OTf})_3/\text{L}_3\text{-RaEt}_2$  (1:1, 5 mol %), 4 Å MS (80 mg) in solvent (3.0 mL) at 35 °C under  $\text{N}_2$  for 14 h. <sup>b</sup> Isolated yield. <sup>c</sup>

Determined by HPLC analysis using a chiral stationary phase.

**Table S3. Screening of metal salts and chiral *N,N'*-dioxide ligands**

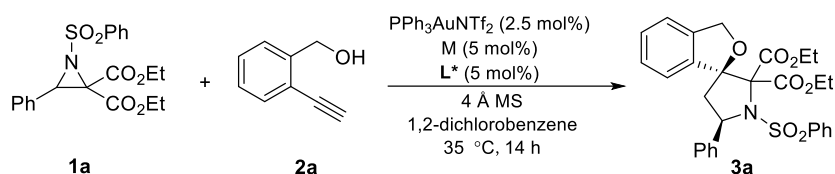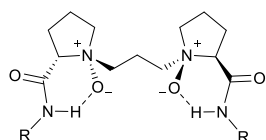

**L<sub>3</sub>-PrMe<sub>2</sub>**: R = 2,6-Me<sub>2</sub>C<sub>6</sub>H<sub>3</sub>  
**L<sub>3</sub>-PrEt<sub>2</sub>**: R = 2,6-Et<sub>2</sub>C<sub>6</sub>H<sub>3</sub>  
**L<sub>3</sub>-PrEt<sub>2</sub>Me**: R = 2,6-Et<sub>2</sub>-4-MeC<sub>6</sub>H<sub>2</sub>

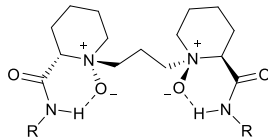

**L<sub>3</sub>-PiMe<sub>2</sub>**: R = 2,6-Me<sub>2</sub>C<sub>6</sub>H<sub>3</sub>  
**L<sub>3</sub>-PiEt<sub>2</sub>**: R = 2,6-Et<sub>2</sub>C<sub>6</sub>H<sub>3</sub>  
**L<sub>3</sub>-PiEt<sub>2</sub>Me**: R = 2,6-Et<sub>2</sub>-4-MeC<sub>6</sub>H<sub>2</sub>

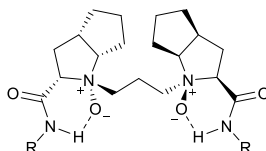

**L<sub>3</sub>-RaMe<sub>2</sub>**: R = 2,6-Me<sub>2</sub>C<sub>6</sub>H<sub>3</sub>  
**L<sub>3</sub>-RaEt<sub>2</sub>**: R = 2,6-Et<sub>2</sub>C<sub>6</sub>H<sub>3</sub>  
**L<sub>3</sub>-RaEt<sub>2</sub>Me**: R = 2,6-Et<sub>2</sub>-4-MeC<sub>6</sub>H<sub>2</sub>  
**L<sub>3</sub>-RaEt<sub>2</sub>Bu**: R = 2,6-*i*-Pr<sub>2</sub>-4-*t*BuC<sub>6</sub>H<sub>2</sub>  
**L<sub>3</sub>-RaPr<sub>2</sub>**: R = 2,6-*i*-PrC<sub>6</sub>H<sub>3</sub>  
**L<sub>3</sub>-RaEt<sub>2</sub>Ad**: R = 2,6-Et<sub>2</sub>-4-(1-adamantyl)C<sub>6</sub>H<sub>2</sub>

| Entry <sup>a</sup> | Metal salt           | L*                                   | Yield (%) <sup>b</sup> | d.r. (%) <sup>c</sup> | ee (%) <sup>c</sup> |
|--------------------|----------------------|--------------------------------------|------------------------|-----------------------|---------------------|
| 1                  | Sc(OTf) <sub>3</sub> | L <sub>3</sub> -RaEt <sub>2</sub>    | 42                     | 57:43                 | 0/34                |
| 2                  | Y(OTf) <sub>3</sub>  | L <sub>3</sub> -RaEt <sub>2</sub>    | 41                     | 60:40                 | 58/57               |
| 3                  | La(OTf) <sub>3</sub> | L <sub>3</sub> -RaEt <sub>2</sub>    | 24                     | 51:49                 | 31/-21              |
| 4                  | Ce(OTf) <sub>3</sub> | L <sub>3</sub> -RaEt <sub>2</sub>    | 23                     | 55:45                 | 30/-10              |
| 5                  | Pr(OTf) <sub>3</sub> | L <sub>3</sub> -RaEt <sub>2</sub>    | 26                     | 55:45                 | 33/-13              |
| 6                  | Nd(OTf) <sub>3</sub> | L <sub>3</sub> -RaEt <sub>2</sub>    | 27                     | 68:32                 | 36/26               |
| 7                  | Sm(OTf) <sub>3</sub> | L <sub>3</sub> -RaEt <sub>2</sub>    | 31                     | 71:29                 | 71/34               |
| 8                  | Eu(OTf) <sub>3</sub> | L <sub>3</sub> -RaEt <sub>2</sub>    | 33                     | 73:27                 | 71/41               |
| 9                  | Gd(OTf) <sub>3</sub> | L <sub>3</sub> -RaEt <sub>2</sub>    | 37                     | 75:25                 | 75/47               |
| 10                 | Tb(OTf) <sub>3</sub> | L <sub>3</sub> -RaEt <sub>2</sub>    | 40                     | 74:26                 | 77/51               |
| 11                 | Dy(OTf) <sub>3</sub> | L <sub>3</sub> -RaEt <sub>2</sub>    | 47                     | 77:23                 | 81/61               |
| 12                 | Ho(OTf) <sub>3</sub> | L <sub>3</sub> -RaEt <sub>2</sub>    | 51                     | 75:25                 | 77/62               |
| 13                 | Er(OTf) <sub>3</sub> | L <sub>3</sub> -RaEt <sub>2</sub>    | 47                     | 74:26                 | 77/60               |
| 14                 | Tm(OTf) <sub>3</sub> | L <sub>3</sub> -RaEt <sub>2</sub>    | 40                     | 75:25                 | 77/61               |
| 15                 | Yb(OTf) <sub>3</sub> | L <sub>3</sub> -RaEt <sub>2</sub>    | 31                     | 71:29                 | 77/62               |
| 16                 | Lu(OTf) <sub>3</sub> | L <sub>3</sub> -RaEt <sub>2</sub>    | 28                     | 67:23                 | 65/49               |
| 17                 | Dy(OT) <sub>3</sub>  | L <sub>3</sub> -RaMe <sub>2</sub>    | 47                     | 65:35                 | 61/42               |
| 18                 | Dy(OT) <sub>3</sub>  | L <sub>3</sub> -RaEt <sub>2</sub> Me | 51                     | 69:31                 | 67/47               |
| 19                 | Dy(OT) <sub>3</sub>  | L <sub>3</sub> -RaEt <sub>2</sub> Bu | 28                     | 72:28                 | 51/51               |
| 20                 | Dy(OT) <sub>3</sub>  | L <sub>3</sub> -RaPr <sub>2</sub>    | 52                     | 68:22                 | 70/62               |
| 21                 | Dy(OT) <sub>3</sub>  | L <sub>3</sub> -RaEt <sub>2</sub> Ad | 51                     | 71:29                 | 57/39               |
| 22                 | Mg(OTf) <sub>2</sub> | L <sub>3</sub> -RaEt <sub>2</sub>    | NR                     | -                     | -                   |

|    |                      |                                       |    |       |       |
|----|----------------------|---------------------------------------|----|-------|-------|
| 23 | Ni(OTf) <sub>3</sub> | <b>L<sub>3</sub>-RaEt<sub>2</sub></b> | NR | -     | -     |
| 24 | Cu(OT) <sub>2</sub>  | <b>L<sub>3</sub>-RaEt<sub>2</sub></b> | NR | -     | -     |
| 25 | Zn(OTf) <sub>2</sub> | <b>L<sub>3</sub>-RaEt<sub>2</sub></b> | NR | -     | -     |
| 26 | Dy(OT) <sub>3</sub>  | <b>L<sub>3</sub>-PrEt<sub>2</sub></b> | 41 | 57:43 | 54/31 |
| 27 | Dy(OT) <sub>3</sub>  | <b>L<sub>3</sub>-PiEt<sub>2</sub></b> | 45 | 61:39 | 59/47 |

<sup>a</sup> The reactions were performed with **1a** (0.1 mmol), **2a** (0.1 mmol), Ph<sub>3</sub>PAuNTf<sub>2</sub> (2.5 mol %), M/L (1:1, 5 mol %), 4 Å MS (80 mg) in 1,2-dichlorobenzene (3.0 mL) at 35 °C for 14 h. <sup>b</sup> Isolated yield. <sup>c</sup> Determined by HPLC analysis using a chiral stationary phase.

**Table S4. Screening of transition-metal salts**

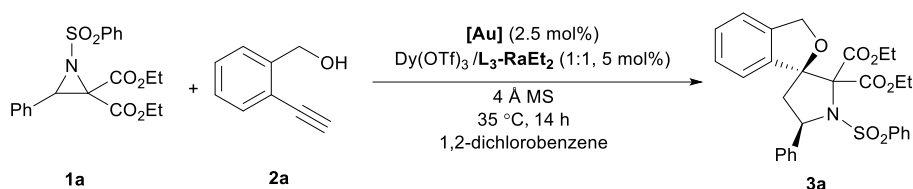

| Entry <sup>a</sup> | [Au]                                     | Yield (%) <sup>b</sup> | d.r. <sup>c</sup> | ee (%) <sup>c</sup> |
|--------------------|------------------------------------------|------------------------|-------------------|---------------------|
| 1                  | PPh <sub>3</sub> AuCl/AgOAc              | 13                     | -                 | -                   |
| 2                  | PPh <sub>3</sub> AuCl/AgNO <sub>3</sub>  | mixture                | -                 | -                   |
| 3                  | PPh <sub>3</sub> AuCl/AgBF <sub>4</sub>  | mixture                | -                 | -                   |
| 4                  | PPh <sub>3</sub> AuCl/AgSbF <sub>6</sub> | 31                     | 68:32             | 65/59               |
| 5                  | PPh <sub>3</sub> AuCl/AgOTf              | 49                     | 70:30             | 71/65               |
| 6                  | PPh <sub>3</sub> AuCl/AgNTf <sub>2</sub> | 57                     | 72:28             | 78/57               |
| 7                  | PPh <sub>3</sub> AuNTf <sub>2</sub>      | 47                     | 75:25             | 81/55               |
| 8 <sup>d</sup>     | PPh <sub>3</sub> AuNTf <sub>2</sub>      | 59                     | 74:26             | 81/55               |
| 9                  | IPrAuNTf <sub>2</sub>                    | 37                     | 64:36             | 64/57               |
| 10                 | PPh <sub>3</sub> AuCl                    | 31                     | 55:45             | 57/57               |
| 11                 | AuCl <sub>3</sub>                        | 15                     | 61:39             | 47/61               |
| 12                 | AuCl(CH <sub>3</sub> SCH <sub>3</sub> )  | 17                     | 54:46             | 31/51               |
| 13                 | CuI                                      | NR                     | -                 | -                   |

<sup>a</sup> Unless otherwise noted, all reactions were performed with **1a** (0.1 mmol), **2a** (0.1 mmol), PPh<sub>3</sub>AuCl/AgX (1:1, 2.5 mol %), Dy(OTf)<sub>3</sub>/L<sub>3</sub>-RaEt<sub>2</sub> (1:1, 5 mol %), 4 Å MS (80 mg) in 1,2-dichlorobenzene (3.0 mL) at 35 °C under N<sub>2</sub> for 14 h. <sup>b</sup> Isolated yield. <sup>c</sup> Determined by HPLC analysis using a chiral stationary phase. <sup>d</sup> 5% mol PPh<sub>3</sub>AuNTf<sub>2</sub> was used.

**Table S5. Screening of molecular sieves**

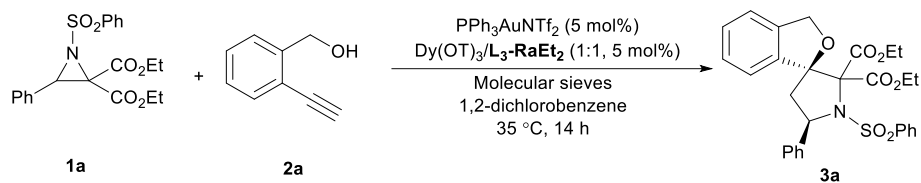

| Entry <sup>a</sup> | Molecular sieves | Yield (%) <sup>b</sup> | d.r. <sup>c</sup> | ee (%) <sup>c</sup> |
|--------------------|------------------|------------------------|-------------------|---------------------|
| 1                  | 3 Å MS, 80 mg    | 37                     | 49:51             | 71/71               |
| 2                  | 4 Å MS, 80 mg    | 59                     | 75:25             | 87/61               |
| 3                  | 5 Å MS, 80 mg    | 17                     | 60:40             | 47/37               |
| 4                  | 4 Å MS, 40 mg    | 41                     | 68:32             | 77/51               |
| 5                  | 4 Å MS, 100 mg   | 67                     | 72:28             | 87/55               |
| 6                  | 4 Å MS, 120 mg   | 71                     | 67:33             | 88/61               |
| 7                  | 4 Å MS, 160 mg   | 44                     | 61:39             | 77/61               |
| 8                  | 4 Å MS, 200 mg   | 31                     | 57:33             | 71/57               |

<sup>a</sup> The reactions were performed with **1a** (0.1 mmol), **2a** (0.1 mmol),  $\text{PPh}_3\text{AuNTf}_2$  (5 mol%),  $\text{Dy}(\text{OTf})_3/\text{L}_3\text{-RaEt}_2$  (1:1, 5 mol%), molecular sieves in 1,2-dichlorobenzene (3.0 mL) at 35 °C under  $\text{N}_2$  for 14 h. <sup>b</sup> Isolated yield. <sup>c</sup> Determined by HPLC analysis using a chiral stationary phase.

**Table S6. Screening of additives**

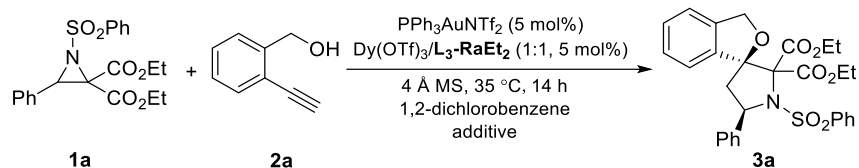

| Entry <sup>a</sup> | Additives                                 | Yield (%) <sup>b</sup> | d.r. <sup>c</sup> | ee (%) <sup>c</sup> |
|--------------------|-------------------------------------------|------------------------|-------------------|---------------------|
| 1                  | $\text{H}_2\text{O}$ (10 $\mu\text{L}$ )  | 36                     | 55:45             | 67/59               |
| 2                  | EtOAc (10 $\mu\text{L}$ )                 | 77                     | 44:56             | 61/43               |
| 3                  | 1,4-dioxane (10 $\mu\text{L}$ )           | 41                     | 87:13             | 67/70               |
| 4                  | Toluene (10 $\mu\text{L}$ )               | 82                     | 73:27             | 51/32               |
| 5                  | $\text{Et}_2\text{O}$ (10 $\mu\text{L}$ ) | 53                     | 84:16             | 66/67               |
| 6                  | THF (10 $\mu\text{L}$ )                   | 48                     | 70:30             | 45/64               |
| 7                  | $\text{PhCOOH}$ (10 mol%)                 | 44                     | 40:60             | 71/59               |
| 8                  | $\text{LiNTf}_2$ (10 mol%)                | 47                     | 81:19             | 45/38               |
| 9                  | $\text{NaBAR}_4^{\text{F}}$ (10 mol%)     | 31                     | 73:27             | 87/47               |
| 10                 | $\text{NaBAR}_4^{\text{F}}$ (2 mol%)      | 67                     | 75:25             | 90/51               |

<sup>a</sup> The reactions were performed with **1a** (0.1 mmol), **2a** (0.10 mmol),  $\text{PPh}_3\text{AuNTf}_2$  (5 mol%),  $\text{Dy}(\text{OTf})_3/\text{L}_3\text{-RaEt}_2$  (1:1, 5 mol%), 4 Å MS (100 mg) and additive in 1,2-dichlorobenzene (3.0 mL) at 35 °C under  $\text{N}_2$  for 14 h. <sup>b</sup> Isolated yield. <sup>c</sup> Determined by HPLC analysis using a chiral stationary phase.

**Table S7. Screening of the ratio of  $\text{Dy}(\text{OTf})_3$  and chiral  $N, N'$ -dioxide ligand**

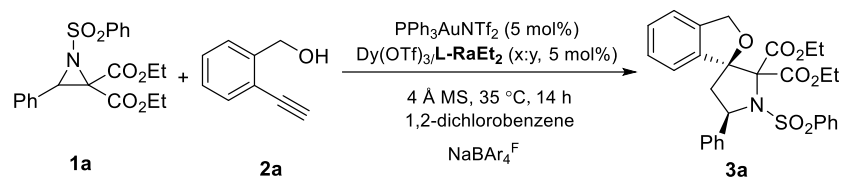

| Entry <sup>a</sup> | x: y  | Yield (%) <sup>b</sup> | d.r. <sup>c</sup> | ee (%) <sup>d</sup> |
|--------------------|-------|------------------------|-------------------|---------------------|
| 1                  | 1:1   | 67                     | 75:25             | 90/61               |
| 2                  | 1:1.1 | 67                     | 74:26             | 92/61               |
| 3                  | 1:1.2 | 68                     | 74:26             | 89/60               |
| 4                  | 1:1.5 | 67                     | 60:40             | 84/52               |
| 5                  | 1:2   | trace                  | -                 | -                   |
| 6                  | 1.1:1 | 68                     | 72:28             | 87/60               |
| 7                  | 1.2:1 | 77                     | 70:30             | 79/61               |
| 8                  | 1.5:1 | 71                     | 55:45             | 77/57               |
| 9                  | 2:1   | 61                     | 53:27             | 67/61               |

<sup>a</sup> The reactions were performed with **1a** (0.1 mmol), **2a** (0.1 mmol),  $\text{AuPPh}_3\text{NTf}_2$  (5 mol %),  $\text{Dy}(\text{OTf})_3/\text{L-RaEt}_2$  (x:y, 5 mol %), 4 Å MS (100 mg) and  $\text{NaBAR}_4^{\text{F}}$  (2 mol %) in 1,2-dichlorobenzene (3.0 mL) at 35 °C under  $\text{N}_2$  for 14 h. <sup>b</sup> Isolated yield by silica gel chromatography. <sup>c</sup> Determined by  $^1\text{H}$  NMR spectroscopy. <sup>d</sup> Determined by HPLC analysis using a chiral stationary phase.

**Table S8. Screening of the ratio of the substrates**

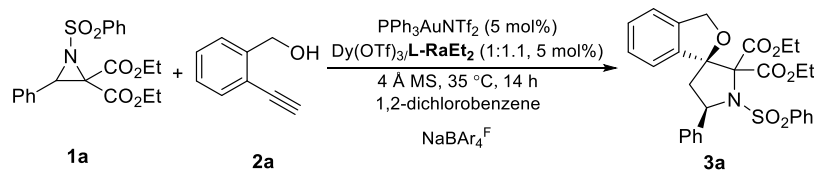

| Entry <sup>a</sup> | <b>1a:2a</b> | Yield (%) <sup>b</sup> | d.r. <sup>c</sup> | ee (%) <sup>d</sup> |
|--------------------|--------------|------------------------|-------------------|---------------------|
| 1                  | 1:1          | 67                     | 75:25             | 90/56               |
| 3                  | 1:1.2        | 71                     | 74:26             | 92/55               |
| 4                  | 1:1.5        | 77                     | 60:40             | 87/52               |
| 5                  | 1:2          | trace                  | -                 | -                   |
| 7                  | 1.2:1        | 77                     | 70:30             | 88/61               |
| 8                  | 1.5:1        | 85                     | 55:45             | 71/57               |
| 9                  | 2:1          | 61                     | 53:27             | 67/61               |

<sup>a</sup> The reactions were performed with **1a**, **2a** at 0.1 mmol scale  $\text{AuPPh}_3\text{NTf}_2$  (5 mol %),  $\text{Dy}(\text{OTf})_3/\text{L-RaEt}_2$  (1:1.1, 5 mol %), 4 Å MS (100 mg) and  $\text{NaBAR}_4^{\text{F}}$  (2 mol %) in 1,2-dichlorobenzene (3.0 mL) at 35 °C under  $\text{N}_2$  for 14 h. <sup>b</sup> Isolated yield by silica gel chromatography. <sup>c</sup> Determined by  $^1\text{H}$  NMR spectroscopy. <sup>d</sup> Determined by HPLC analysis using a chiral stationary phase.

**Table S9. Rescreening of the chiral N,N'-dioxide ligands and other ligands**



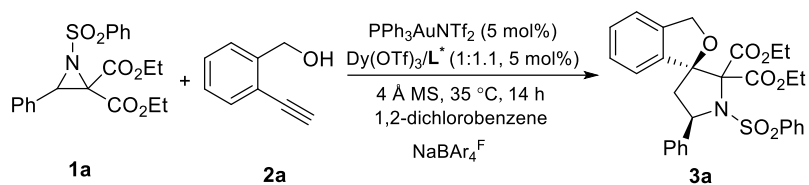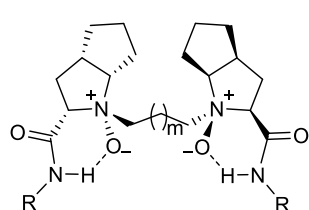

$m = 0$ , **L<sub>2</sub>-RaMe<sub>2</sub>**: R = 2,6-Me<sub>2</sub>C<sub>6</sub>H<sub>3</sub>  
 $m = 0$ , **L<sub>2</sub>-RaEt<sub>2</sub>**: R = 2,6-Et<sub>2</sub>C<sub>6</sub>H<sub>3</sub>  
 $m = 1$ , **L<sub>3</sub>-RaMe<sub>2</sub>**: R = 2,6-Me<sub>2</sub>C<sub>6</sub>H<sub>3</sub>  
 $m = 1$ , **L<sub>3</sub>-RaEt<sub>2</sub>**: R = 2,6-Et<sub>2</sub>C<sub>6</sub>H<sub>3</sub>  
 $m = 1$ , **L<sub>3</sub>-RaEt<sub>2</sub>Me**: R = 2,6-Et<sub>2</sub>-4-MeC<sub>6</sub>H<sub>2</sub>  
 $m = 1$ , **L<sub>3</sub>-RaEt<sub>2</sub>Br**: R = 2,6-Et<sub>2</sub>-4-BrC<sub>6</sub>H<sub>2</sub>  
 $m = 2$ , **L<sub>4</sub>-RaMe<sub>2</sub>**: R = 2,6-Me<sub>2</sub>-C<sub>6</sub>H<sub>3</sub>  
 $m = 2$ , **L<sub>4</sub>-RaEt<sub>2</sub>Me**: R = 2,6-Et-4-MeC<sub>6</sub>H<sub>2</sub>

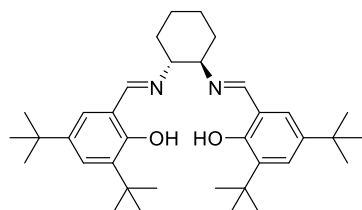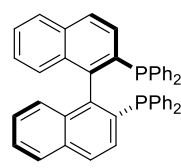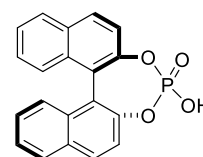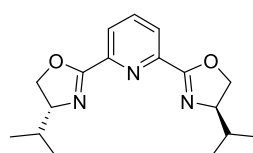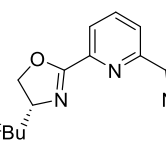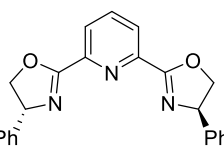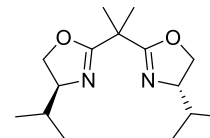

| Entry <sup>a</sup> | L*                                      | Yield (%) <sup>b</sup> | d.r. (%) <sup>c</sup> | ee (%) <sup>c</sup> |
|--------------------|-----------------------------------------|------------------------|-----------------------|---------------------|
| 1                  | <b>L<sub>2</sub>-RaMe<sub>2</sub></b>   | 42                     | 70:30                 | 47/21               |
| 2                  | <b>L<sub>2</sub>-RaEt<sub>2</sub></b>   | 55                     | 71:29                 | 62/33               |
| 3                  | <b>L<sub>3</sub>-RaMe<sub>2</sub></b>   | 57                     | 67:33                 | 77/42               |
| 4                  | <b>L<sub>3</sub>-RaEt<sub>2</sub></b>   | 71                     | 74:26                 | 92/55               |
| 5                  | <b>L<sub>3</sub>-RaEt<sub>2</sub>Me</b> | 68                     | 71:29                 | 77/48               |
| 6                  | <b>L<sub>3</sub>-RaEt<sub>2</sub>Br</b> | 43                     | 75:25                 | 91/58               |
| 7                  | <b>L<sub>4</sub>-RaMe<sub>2</sub></b>   | 49                     | 61:29                 | 66/37               |
| 8                  | <b>L<sub>4</sub>-RaEt<sub>2</sub>Me</b> | 47                     | 66:33                 | 69/44               |
| 9                  | <b>L1</b>                               | trace                  | --                    | --                  |
| 10                 | <b>L2</b>                               | trace                  | --                    | --                  |
| 11                 | <b>L3</b>                               | 12                     | 57:43                 | 5/3                 |
| 12                 | <b>L4</b>                               | 37                     | 67:33                 | 31/24               |
| 13                 | <b>L5</b>                               | 21                     | 73:27                 | 15/7                |
| 14                 | <b>L6</b>                               | 40                     | 63:37                 | 21/10               |
| 15                 | <b>L7</b>                               | 37                     | 40:60                 | 0/3                 |

<sup>a</sup> The reactions were performed with **1a** (0.1 mmol), **2a** (0.12 mmol), Ph<sub>3</sub>PAuNTf<sub>2</sub> (5 mol %), M/L (1:1.1, 5

mol %), 4Å MS (100 mg) and NaBAR<sub>4</sub><sup>F</sup> (2 mol %) in 1,2-dichlorobenzene (3.0 mL) at 35 °C for 14 h. <sup>b</sup> Isolated yield. <sup>c</sup> Determined by HPLC analysis using a chiral stationary phase.

### (F) Control experiments

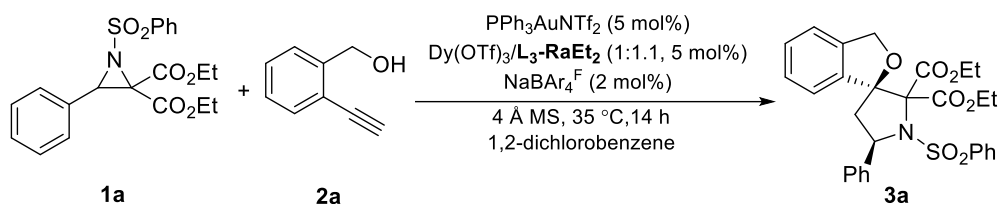

| Entry <sup>a</sup> | Dy(OTf) <sub>3</sub> | L-RaEt <sub>2</sub> | Au (III)              | Yield (%) <sup>b</sup> | dr <sup>c</sup> | ee <sup>d</sup> (%) |
|--------------------|----------------------|---------------------|-----------------------|------------------------|-----------------|---------------------|
| 1                  | +                    | +                   | +                     | 71                     | 74:26           | 92/55               |
| 2                  | -                    | -                   | +                     | n.r.                   | --              | --                  |
| 3                  | -                    | +                   | +                     | n.r.                   | --              | --                  |
| 4                  | +                    | -                   | +                     | 57                     | 70:30           | --                  |
| 5                  | +                    | +                   | PPh <sub>3</sub> AuCl | 31                     | 55:45           | 57/57               |
| 6                  | +                    | +                   | AgNTf <sub>2</sub>    | 17                     | 75:25           | 77/42               |

### (G) Unsuccessful substrates

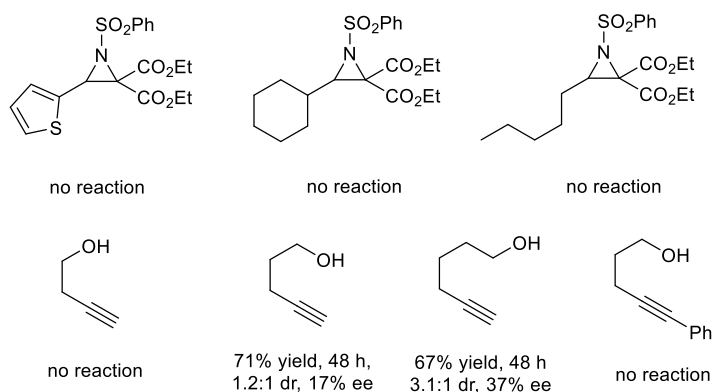

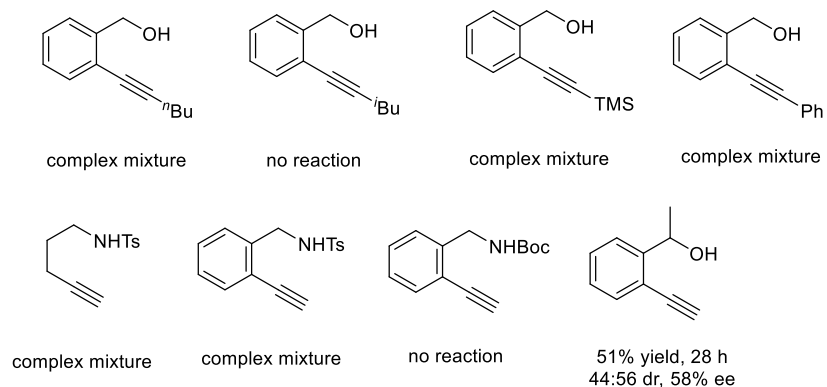

### (H) Experimental procedure for the scale-up reaction

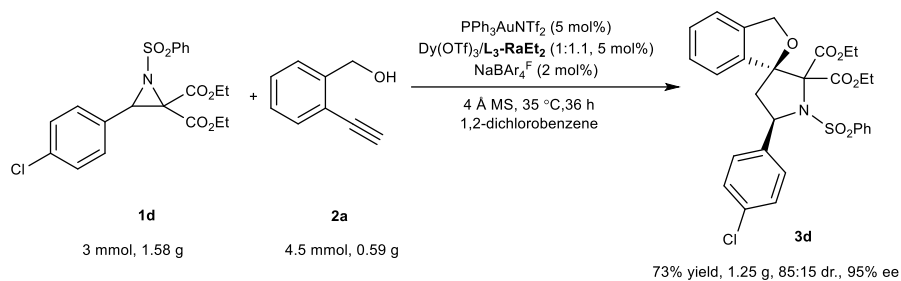

An over dried test tube was charged with  $\text{Dy}(\text{OTf})_3$  (5 mol%, 0.15 mmol, 182.9 mg),  $\text{L}_3\text{-RaEt}_2$  (5.5 mol%, 0.165 mmol, 106.3 mg),  $\text{AuPPh}_3\text{NTf}_2$  (5% mol, 212.5 mg),  $\text{NaBAR}_4\text{F}$  (2 mol%, 0.06 mmol, 53.2 mg), 4 Å MS (2.5 g) and 1,2-dichlorobenzene (45 mL) under  $\text{N}_2$  atmosphere and the resulting solution was stirred at 35 °C for 2 h. Then, the solution of **1d** (3.0 mmol, 1.58 g) and **2a** (4.5 mmol, 0.59 g) in 45 mL 1,2-dichlorobenzene were slowly added into the tube. Then, the reaction mixture was stirred at 35 °C and detected by TLC. After the reaction was completed, the residue was subjected to column chromatography ( $\text{SiO}_2$ , eluent: petroleum ether/ethyl acetate = 8:1 to 4:1) to afford the enantioenriched product **3d** (73% yield, 1.25 g, 85:15 dr., 95% ee).

### (I) X-ray crystal structure of product

The following single crystal **3d** was recrystallized from DCM/*n*-hexane. The absolute configuration of **3d** was determined as (1*S*,5'*R*) by X-ray diffraction. CCDC 2041898 contains the supplementary crystallographic data which can be obtained free of charge from The Cambridge Crystallographic Data Center via <https://www.ccdc.cam.ac.uk/structures/>

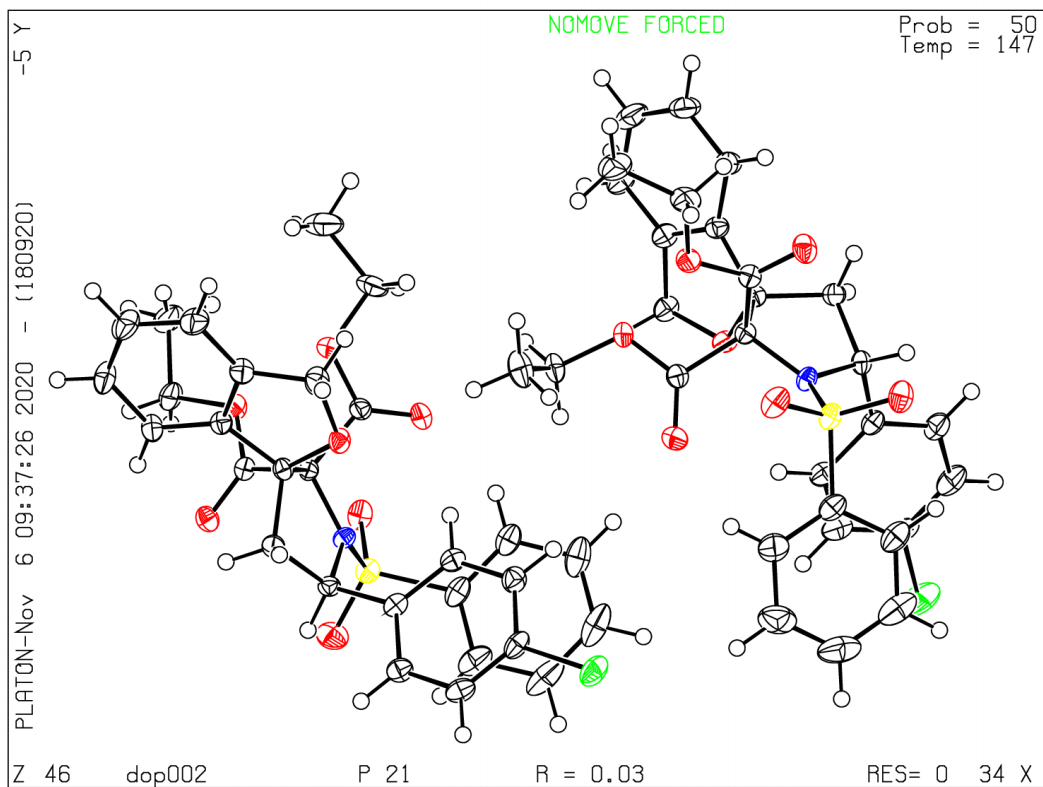

Figure 1. the thermal ellipsoid figure of **3d** with 50% probabilities

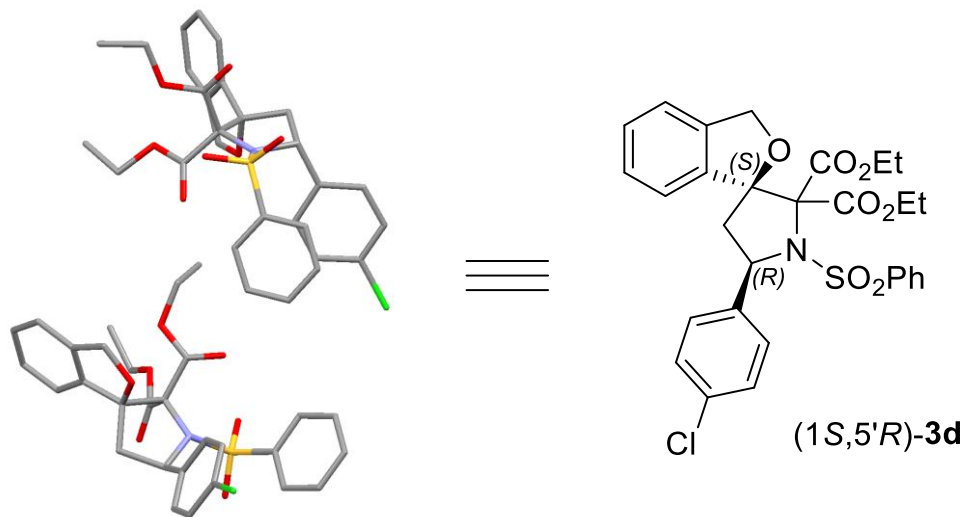

Crystallographic Data for **3d**.

|                    |                                                           |
|--------------------|-----------------------------------------------------------|
| Formula            | <b>C<sub>29</sub>H<sub>28</sub>ClNO<sub>7</sub>S (3d)</b> |
| Formula mass (amu) | 570.0530                                                  |
| Space group        | P 21 21 21                                                |
| <i>a</i> (Å)       | 13.2473(6)                                                |
| <i>c</i> (Å)       | 12.8427(6)                                                |

|                                                   |                |
|---------------------------------------------------|----------------|
| $c$ (Å)                                           | $c=16.3970(8)$ |
| $\alpha$ (deg)                                    | 90             |
| $\beta$ (deg)                                     | 90             |
| $\gamma$ (deg)                                    | 90             |
| $V$ (Å <sup>3</sup> )                             | 2787.0(2)      |
| $Z$                                               | 4              |
| $\lambda$ (Å)                                     | 0.71073        |
| $T$ (K)                                           | 147            |
| $\rho_{\text{calcd}}$ (g cm <sup>-3</sup> )       | 1.359          |
| $\mu$ (mm <sup>-1</sup> )                         | 0.26           |
| Transmission factors                              | 0.916, 0.972   |
| $2\theta_{\text{max}}$ (deg)                      | 27.519         |
| No. of unique data, including $F_o^2 < 0$         | 12801          |
| No. of unique data, with $F_o^2 > 2\sigma(F_o^2)$ | 12414          |
| No. of variables                                  | 707            |
| $R(F)$ for $F_o^2 > 2\sigma(F_o^2)$ <sup>a</sup>  | 0.0254         |
| $R_w(F_o^2)$ <sup>b</sup>                         | 0.0660         |
| Goodness of fit                                   | 1.039          |

---

<sup>a</sup>  $R(F) = \sum ||F_o| - |F_c|| / \sum |F_o|$ .

<sup>b</sup>  $R_w(F_o^2) = [\sum [w(F_o^2 - F_c^2)^2] / \sum wF_o^4]^{1/2}$ ;  $w^{-1} = [\sigma^2(F_o^2) + (Ap)^2 + Bp]$ , where  $p = [\max(F_o^2, 0) + 2F_c^2] / 3$ .

## (J) Spectral characterization data for the products

Diethyl (1*S*,5'*R*)-5'-phenyl-1'-(phenylsulfonyl)-3*H*-spiro[isobenzofuran-1,3'-pyrrolidine]-2',2'-dicarboxylate (**3a**)

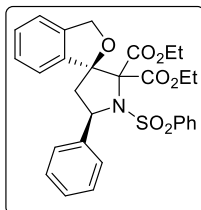

0.1 mmol scale reaction, 14 h, 38.1 mg, 71% yield; white foam. Melting point: 122 – 123 °C. 74:26 dr., 92% ee for the major isomer and 55% ee for the minor isomer.  $[\alpha]_D^{17} = +37.4$  ( $c = 1.26$  in  $\text{CH}_2\text{Cl}_2$ ).

**HPLC** (Daicel chiralcel ADH, hexane/*i*-PrOH = 90/10, flow rate 1.0 mL/min,  $\lambda = 254$  nm)  $t_r$  (major-major) = 16.70 min,  $t_r$  (major-minor) = 26.72 min,  $t_r$  (minor-major) = 14.64 min,  $t_r$  (minor-minor) = 15.26 min.

**$^1\text{H}$  NMR** (400 MHz, Chloroform-*d*)  $\delta$  7.59 (dd,  $J = 8.4, 1.2$  Hz, 2H), 7.50 – 7.36 (m, 5H), 7.35 – 7.27 (m, 2H), 7.25 – 7.19 (m, 3H), 7.16 – 7.06 (m, 2H), 5.82 (d,  $J = 10.4$  Hz, 1H), 4.96 (s, 2H), 4.54 – 4.35 (m, 3H), 4.23 – 4.04 (m, 1H), 3.53 (dd,  $J = 13.6, 10.8$  Hz, 1H), 2.31 (dd,  $J = 13.6, 1.6$  Hz, 1H), 1.42 (t,  $J = 7.2$  Hz, 3H), 1.12 (t,  $J = 7.2$  Hz, 3H).

**$^{13}\text{C}\{^1\text{H}\}$  NMR** (101 MHz, Chloroform-*d*)  $\delta$  167.73, 165.85, 141.29, 140.73, 136.78, 131.96, 128.95, 128.62, 128.56, 128.21, 127.95, 127.81, 127.74, 127.54, 127.46, 126.8, 122.26, 120.54, 99.78, 73.12, 64.45, 62.52, 61.59, 47.85, 13.89, 13.70.

**HR-MS** (ESI) calcd for  $\text{C}_{29}\text{H}_{29}\text{NNaO}_7\text{S}^+$  ( $[\text{M}+\text{Na}^+]$ ) = 558.1557, found 558.1558.

**IR** (neat)  $\nu$  ( $\text{cm}^{-1}$ ): 2983, 1753, 1724, 1447, 1365, 1339, 1264, 1227, 1021, 897, 755, 728, 689, 605, 571, 545, 471.

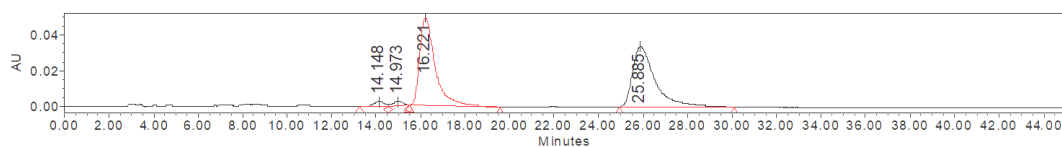

|   | Retention Time | % Area |
|---|----------------|--------|
| 1 | 14.148         | 1.65   |
| 2 | 14.973         | 1.58   |
| 3 | 16.221         | 48.41  |
| 4 | 25.885         | 48.37  |

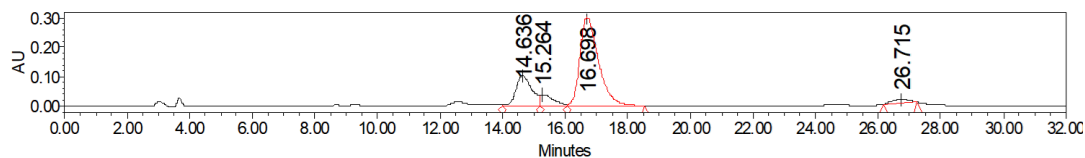

|   | Retention Time | % Area |
|---|----------------|--------|
| 1 | 14.636         | 20.41  |
| 2 | 15.264         | 5.91   |
| 3 | 16.698         | 70.78  |
| 4 | 26.715         | 2.91   |

**Diethyl (1*S*,5'*R*)-1'-(phenylsulfonyl)-5'-(*p*-tolyl)-3*H*-spiro[isobenzofuran-1,3'-pyrrolidine]-2',2'-dicarboxylate (3b)**

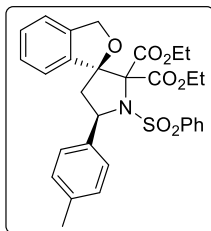

0.1 mmol scale reaction, 14 h, 30.1 mg, 55% yield; white foam. Melting point: 108 – 111 °C. 80:20 dr., 90% ee for the major isomer and 78% ee for the minor isomer.  $[\alpha]_{\lambda}^{17} = +5.6$  ( $c = 0.37$  in  $\text{CH}_2\text{Cl}_2$ ,  $\lambda = 405$  nm).

**HPLC** (Daicel chiralcel ADH, hexane/*i*-PrOH = 90/10, flow rate 1.0 mL/min,  $\lambda = 254$  nm)  $t_r$  (major-major) = 15.66 min,  $t_r$  (major-minor) = 27.68 min,  $t_r$  (minor-major) = 25.31 min,  $t_r$  (minor-minor) = 33.29 min.

**$^1\text{H}$  NMR** (400 MHz, Chloroform-*d*)  $\delta$  7.50 (d,  $J = 8.2$  Hz, 2H), 7.43 – 7.28 (m, 4H), 7.22 (s, 1H), 7.18 – 7.09 (m, 4H), 6.84 (d,  $J = 7.6$  Hz, 2H), 5.71 (d,  $J = 10.8$  Hz, 1H), 4.91 (s, 2H), 4.46 – 4.26 (m, 3H), 4.13 – 3.98 (m, 1H), 3.43 (dd,  $J = 13.2, 10.8$  Hz, 1H), 2.26 (s, 3H), 2.21 (s, 1H), 1.35 (t,  $J = 7.2$  Hz, 3H), 1.05 (t,  $J = 7.2$  Hz, 3H).

**$^{13}\text{C}\{^1\text{H}\}$  NMR** (101 MHz, Chloroform-*d*)  $\delta$  167.76, 165.84, 140.68, 138.38, 136.52, 131.83, 129.01, 128.63, 128.49, 128.22, 127.54, 127.39, 122.28, 120.54, 99.76, 73.13, 64.32, 62.49, 61.57, 47.91, 21.05, 13.90, 13.71.

**HR-MS** (ESI) calcd for  $\text{C}_{30}\text{H}_{31}\text{NNaO}_7\text{S}^+$  ( $[\text{M}] + \text{Na}^+$ ) = 572.1713, found 572.1714.

**IR** (neat)  $\nu$  ( $\text{cm}^{-1}$ ): 2926, 1756, 1726, 1514, 1447, 1340, 1293, 1231, 1158, 1063, 1025, 899, 815, 760, 727, 689, 604, 576, 547, 466.

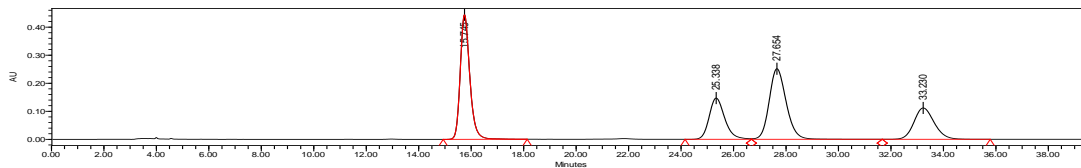

|   | Retention Time | % Area |
|---|----------------|--------|
| 1 | 15.745         | 32.47  |
| 2 | 25.338         | 17.53  |
| 3 | 27.654         | 32.71  |
| 4 | 33.230         | 17.29  |

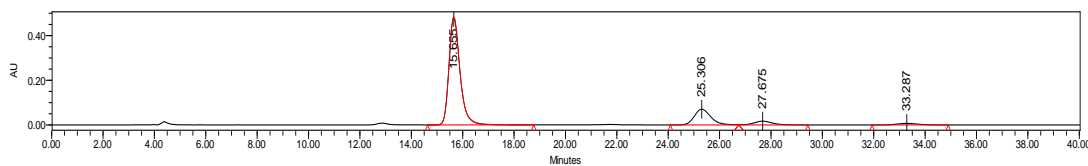

|   | Retention Time | % Area |
|---|----------------|--------|
| 1 | 15.655         | 76.88  |
| 2 | 25.306         | 16.75  |
| 3 | 27.675         | 4.35   |
| 4 | 33.287         | 2.03   |

**Diethyl (1*S*,5'*R*)-5'-(4-fluorophenyl)-1'-(phenylsulfonyl)-3*H*-spiro[isobenzofuran-1,3'-pyrrolidine]-2',2'-dicarboxylate (3c)**

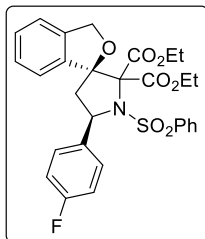

0.1 mmol scale reaction, 28 h, 22.7 mg, 41% yield; white foam. Melting point: 128 – 131 °C. 80:20 dr., 94% ee for the major isomer and 68% ee for the minor isomer.  $[\alpha]_D^{17} = +25.7$  (c = 0.30 in CH<sub>2</sub>Cl<sub>2</sub>).

**HPLC** (Daicel chiralcel ADH, hexane/*i*-PrOH = 90/10, flow rate 1.0 mL/min,  $\lambda = 254$  nm)  $t_r$  (major-major) = 25.87 min,  $t_r$  (major-minor) = 31.88 min,  $t_r$  (minor-major) = 35.43,  $t_r$  (minor-minor) = 44.69.

**<sup>1</sup>H NMR** (400 MHz, Chloroform-*d*)  $\delta$  7.67 – 7.43 (m, 2H), 7.41 – 7.25 (m, 5H), 7.19 (q,  $J = 7.6$  Hz, 4H), 6.81 – 6.63 (m, 2H), 5.72 (d,  $J = 9.6$  Hz, 1H), 4.89 (s, 2H), 4.46 – 4.25 (m, 3H), 4.18 – 4.01 (m, 1H), 3.45 (dd,  $J = 13.2, 10.4$  Hz, 1H), 2.20 – 2.16 (m, 1H), 1.34 (t,  $J = 7.2$  Hz, 3H), 1.05 (t,  $J = 7.2$  Hz, 3H).

**<sup>13</sup>C{<sup>1</sup>H} NMR** (101 MHz, Chloroform-*d*)  $\delta$  167.63, 165.86, 163.07, 160.63 (d,  $J = 246.0$  Hz), 140.64 (d,  $J = 4.8$  Hz), 137.15, 136.61, 132.18, 129.86, 129.78 (d,  $J = 8.0$  Hz), 129.11, 127.84, 127.57, 122.24, 120.57, 114.62, 114.41 (d,  $J = 21.4$  Hz), 99.74, 85.32, 73.15, 63.70, 62.58, 61.67, 13.88, 13.69.

**HRMS** (ESI) calcd for C<sub>29</sub>H<sub>28</sub>FNNaO<sub>7</sub>S<sup>+</sup> ([M]<sup>+</sup>+Na<sup>+</sup>) = 567.1463, found 567.1465.

**<sup>19</sup>F{<sup>1</sup>H} NMR** (376 MHz, Chloroform-*d*)  $\delta = -116.11$ .

**IR** (neat)  $\nu$  (cm<sup>-1</sup>): 2984, 1754, 1725, 1604, 1510, 1447, 1341, 1295, 1226, 1156, 1063, 1043, 1022, 899, 839, 760, 728, 689, 602, 576, 547, 466.

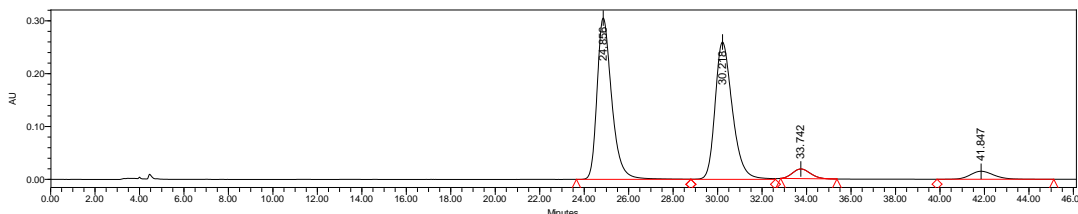

|   | Retention Time | % Area |
|---|----------------|--------|
| 1 | 24.856         | 46.43  |
| 2 | 30.218         | 46.41  |
| 3 | 33.742         | 3.39   |
| 4 | 41.847         | 3.78   |

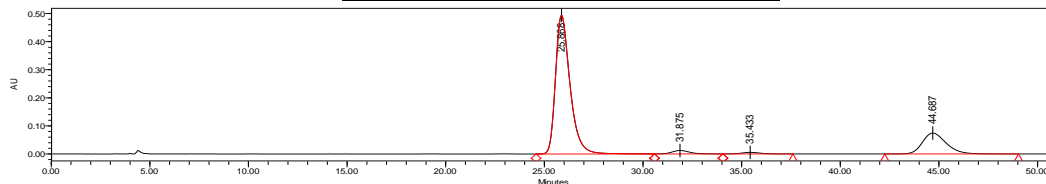

|   | Retention Time | % Area |
|---|----------------|--------|
| 1 | 25.868         | 77.28  |
| 2 | 31.875         | 2.42   |
| 3 | 35.433         | 1.18   |
| 4 | 44.687         | 19.12  |



**Diethyl (1*S*,5'*R*)-5'-(4-chlorophenyl)-1'-(phenylsulfonyl)-3*H*-spiro[isobenzofuran-1,3'-pyrrolidine]-2',2'-dicarboxylate (3d)**

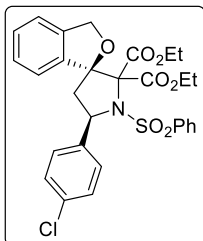

0.1 mmol scale reaction, 36 h, 44.5 mg, 78% yield; white foam. Melting point: 153 – 155 °C, 85:15 dr., 93% ee for the major isomer and 84% ee for the minor isomer.  $[\alpha]_{\lambda}^{17} = +14.8$  ( $c = 1.15$  in  $\text{CH}_2\text{Cl}_2$ ,  $\lambda = 405$  nm).

**HPLC** (Daicel chiralcel ADH, hexane/*i*-PrOH = 85/15, flow rate 1.0 mL/min,  $\lambda = 254$  nm)  $t_r$  (major-major) = 16.22 min,  $t_r$  (major-minor) = 32.82 min,  $t_r$  (minor-major) = 26.49 min,  $t_r$  (minor-minor) = 38.06 min.

**$^1\text{H}$  NMR** (400 MHz, Chloroform-*d*)  $\delta$  7.55 (d,  $J = 7.2$  Hz, 2H), 7.44 – 7.28 (m, 2H), 7.24 – 7.09 (m, 7H), 6.94 (d,  $J = 8.4$  Hz, 2H), 5.65 (d,  $J = 10.0$  Hz, 1H), 4.83 (s, 2H), 4.41 – 4.23 (m, 3H), 4.12 – 3.94 (m, 1H), 3.40 (dd,  $J = 13.6, 10.8$  Hz, 1H), 2.13 (d,  $J = 13.6$  Hz, 1H), 1.29 (t,  $J = 7.2$  Hz, 3H), 1.01 (t,  $J = 7.2$  Hz, 3H).

**$^{13}\text{C}\{^1\text{H}\}$  NMR** (101 MHz, Chloroform-*d*)  $\delta$  167.58, 165.84, 140.59, 140.47, 139.96, 136.50, 132.58, 132.27, 130.34, 129.50, 129.14, 128.69, 127.83, 127.63, 122.22, 120.60, 99.76, 85.31, 73.15, 63.69, 62.60, 61.69, 47.76, 13.87, 13.70.

**HRMS** (ESI) calcd for  $\text{C}_{29}\text{H}_{28}^{35}\text{ClINNaO}_7\text{S}^+$  ( $[\text{M}]+\text{Na}^+$ ) = 592.1167, 592.1167.

**HRMS** (ESI) calcd for  $\text{C}_{29}\text{H}_{28}^{37}\text{ClINNaO}_7\text{S}^+$  ( $[\text{M}]+\text{Na}^+$ ) = 594.1138, 592.1137.

**IR** (neat)  $\nu$  ( $\text{cm}^{-1}$ ): 2928, 1754, 1725, 1488, 1447, 1414, 1341, 1294, 1230, 1158, 1091, 1063, 1020, 899, 861, 821, 758, 728, 689, 602, 575, 544, 441.

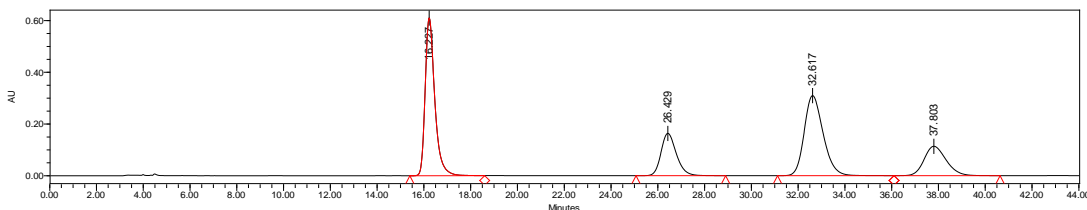

|   | Retention Time | % Area |
|---|----------------|--------|
| 1 | 16.227         | 34.98  |
| 2 | 26.429         | 15.01  |
| 3 | 32.617         | 35.02  |
| 4 | 37.803         | 14.99  |

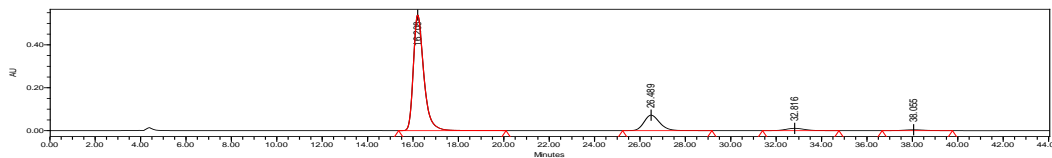

|   | Retention Time | % Area |
|---|----------------|--------|
| 1 | 16.208         | 79.65  |
| 2 | 26.489         | 16.13  |
| 3 | 32.816         | 2.94   |
| 4 | 38.055         | 1.27   |

**Diethyl (1*S*,5'*R*)-5'-(4-bromophenyl)-1'-(phenylsulfonyl)-3*H*-spiro[isobenzofuran-1,3'-pyrrolidine]-2',2'-dicarboxylate (3e)**

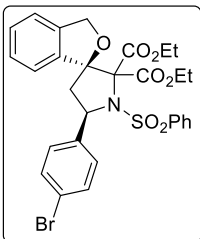

0.1 mmol scale reaction, 36 h, 43.6 mg, 71% yield; white foam. Melting point: 161 – 163 °C. 83:17 dr., 94% ee for the major isomer and 77% ee for the minor isomer.  $[\alpha]_{\lambda}^{17} = +31.7$  ( $c = 0.82$  in  $\text{CH}_2\text{Cl}_2$ ,  $\lambda = 405$  nm).

**HPLC** (Daicel chiralcel ADH, hexane/*i*-PrOH = 80/20, flow rate 1.0 mL/min,  $\lambda = 254$  nm)  $t_r$  (major-major) = 11.17 min,  $t_r$  (major-minor) = 51.72 min,  $t_r$  (minor-major) = 12.79 min,  $t_r$  (minor-minor) = 16.51 min.

**$^1\text{H}$  NMR** (400 MHz, Chloroform-*d*)  $\delta$  7.59 (d,  $J = 7.6$  Hz, 2H), 7.45 – 7.29 (m, 4H), 7.23 – 7.09 (m, 8H), 5.68 (d,  $J = 9.6$  Hz, 1H), 4.87 (s, 2H), 4.37 (dtt,  $J = 18.0, 7.6, 3.2$  Hz, 3H), 4.15 – 4.00 (m, 1H), 3.45 (dd,  $J = 13.6, 10.8$  Hz, 1H), 2.17 (d,  $J = 13.2$  Hz, 1H), 1.34 (t,  $J = 7.2$  Hz, 3H), 1.05 (t,  $J = 7.2$  Hz, 3H).

**$^{13}\text{C}\{^1\text{H}\}$  NMR** (101 MHz, Chloroform-*d*)  $\delta$  167.58, 165.84, 140.59, 140.47, 140.39, 136.47, 132.31, 130.80, 129.85, 129.16, 127.66, 122.22, 120.76, 120.61, 99.77, 73.18, 63.72, 62.63, 61.72, 47.70, 13.89, 13.72.

**HRMS** (ESI) calcd for  $\text{C}_{29}\text{H}_{28}^{79}\text{BrNNaO}_7\text{S}^+$  ( $[\text{M}]+\text{Na}^+$ ) = 636.0662, found 636.0665.

**HRMS** (ESI) calcd for  $\text{C}_{29}\text{H}_{28}^{81}\text{BrNNaO}_7\text{S}^+$  ( $[\text{M}]+\text{Na}^+$ ) = 638.0641, found 638.0642.

**IR** (neat): 2983, 1754, 1725, 1484, 1446, 1341, 1294, 1232, 1158, 1093, 1018, 899, 860, 818, 758, 729, 688, 602, 574, 545, 459.

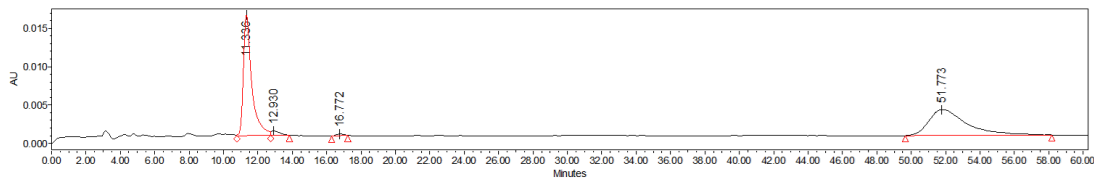

|   | Retention Time | % Area |
|---|----------------|--------|
| 1 | 11.336         | 49.47  |
| 2 | 12.930         | 1.76   |
| 3 | 16.772         | 0.61   |
| 4 | 51.773         | 48.16  |

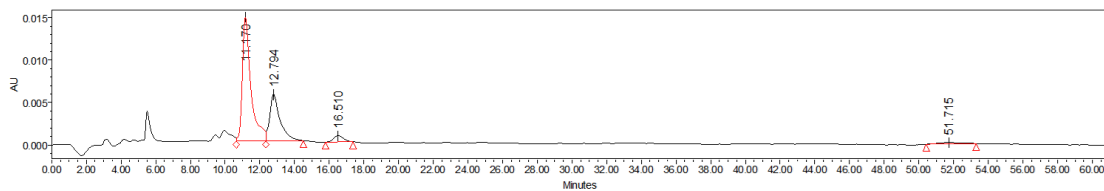

|   | Retention Time | % Area |
|---|----------------|--------|
| 1 | 11.170         | 65.00  |
| 2 | 12.794         | 29.30  |
| 3 | 16.510         | 3.74   |
| 4 | 51.715         | 1.96   |

**Diethyl (1*S*,5'*R*)-5'-(4-nitrophenyl)-1'-(phenylsulfonyl)-3*H*-spiro[isobenzofuran-1,3'-pyrrolidine]-2',2'-dicarboxylate (3f)**

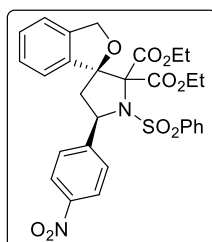

0.1 mmol scale reaction, 60 h, 27.3 mg, 47% yield; white foam. Melting point: 144 – 147 °C. 85:15 dr., 85% ee for the major isomer and 72% ee for the minor isomer.  $[\alpha]_{\lambda}^{17} = +11.8$  ( $c = 1.18$  in  $\text{CH}_2\text{Cl}_2$ ,  $\lambda = 405$  nm).

**HPLC** (Daicel chiralcel ADH, hexane/*i*-PrOH = 85/15, flow rate 1.0 mL/min,  $\lambda = 254$  nm)  $t_r$  (major-major) = 22.49 min,  $t_r$  (major-minor) = 39.25 min,  $t_r$  (minor-major) = 37.20 min,  $t_r$  (minor-minor) = 45.35 min.

**$^1\text{H}$  NMR** (400 MHz, Chloroform-*d*)  $\delta$  7.81 – 7.68 (m, 2H), 7.64 – 7.45 (m, 2H), 7.43 – 7.26 (m, 3H), 7.24 – 7.13 (m, 2H), 7.05 (m, 4H), 5.66 (d,  $J = 10.4$  Hz, 1H), 4.79 – 4.53 (m, 2H), 4.38 – 4.09 (m, 3H), 4.01 – 3.90 (m, 1H), 3.41 (dd,  $J = 13.4, 10.6$  Hz, 1H), 2.04 (d,  $J = 13.4$  Hz, 1H), 1.21 (t,  $J = 7.2$  Hz, 3H), 0.96 (t,  $J = 7.2$  Hz, 3H).

**$^{13}\text{C}\{^1\text{H}\}$  NMR** (101 MHz, Chloroform-*d*)  $\delta$  167.36, 165.88, 146.67, 140.56, 139.98, 132.78, 129.31, 128.81, 128.55, 127.89, 127.70, 122.84, 122.20, 120.67, 73.25, 63.38, 62.80, 61.91, 47.70, 13.87, 13.74.

**HRMS** (ESI) calcd for  $\text{C}_{29}\text{H}_{28}\text{N}_2\text{NaO}_9\text{S}^+$  ( $[\text{M}]+\text{Na}^+$ ) = 603.1408, Found 603.1410.

**IR** (neat)  $\nu$  ( $\text{cm}^{-1}$ ): 2984, 1753, 1725, 1602, 1519, 1446, 1343, 1294, 1228, 1159, 1093, 1064, 1020, 901, 853, 755, 729, 689, 601, 575, 548, 440.

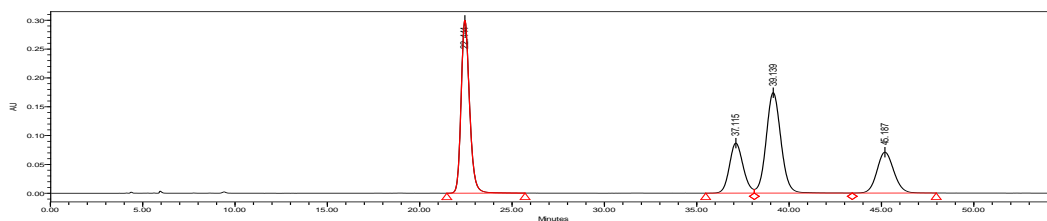

|   | Retention Time | % Area |
|---|----------------|--------|
| 1 | 22.444         | 33.92  |
| 2 | 37.115         | 15.86  |
| 3 | 39.139         | 34.27  |
| 4 | 45.187         | 15.94  |

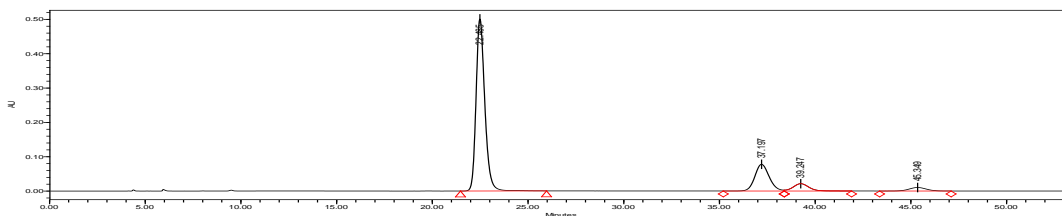

|   | Retention Time | % Area |
|---|----------------|--------|
| 1 | 22.485         | 72.89  |
| 2 | 37.197         | 18.50  |
| 3 | 39.247         | 5.61   |
| 4 | 45.349         | 2.99   |

**Diethyl (1*S*,5'*R*)-1'-(phenylsulfonyl)-5'-(4-(trifluoromethyl)phenyl)-3*H*-spiro[isobenzofuran-1,3'-pyrrolidine]-2',2'-dicarboxylate (3g)**

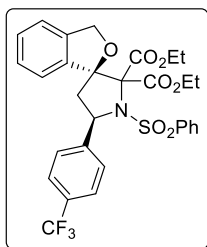

0.1 mmol scale reaction, 48 h, 36.8 mg, 61% yield; white foam. Melting point: 171 – 173 °C, 80:20 d.r., 94% ee for the major isomer and 68% ee for the minor isomer.  $[\alpha]_{\lambda}^{17} = +18.7$  ( $c = 0.978$  in  $\text{CH}_2\text{Cl}_2$ ,  $\lambda = 405$  nm).

**HPLC** (Daicel chiralcel ADH, hexane/*i*-PrOH = 90/10, flow rate 1.0 mL/min,  $\lambda = 254$  nm)  $t_r$  (major-major) = 22.71 min,  $t_r$  (major-minor) = 36.31 min,  $t_r$  (minor-major) = 46.64 min,  $t_r$  (minor-minor) = 42.28 min

**$^1\text{H}$  NMR** (400 MHz, Chloroform-*d*)  $\delta$  7.59 (d,  $J = 7.2$  Hz, 2H), 7.45 – 7.31 (m, 5H), 7.29 (d,  $J = 8.0$  Hz, 2H), 7.24 – 7.11 (m, 5H), 5.72 (d,  $J = 10.4$  Hz, 1H), 4.87 (s, 2H), 4.38 (dtq,  $J = 14.4, 7.2, 3.2$  Hz, 3H), 4.18 – 4.00 (m, 1H), 3.47 (ddd,  $J = 17.6, 13.4, 10.8$  Hz, 1H), 2.20 (d,  $J = 13.6$  Hz, 1H), 1.34 (t,  $J = 7.2$  Hz, 3H), 1.07 (t,  $J = 7.2$  Hz, 3H).

**$^{13}\text{C}\{^1\text{H}\}$  NMR** (101 MHz, Chloroform-*d*)  $\delta$  167.53, 165.82, 145.36, 140.59 (d,  $J = 37.4$  Hz), 136.34, 132.42, 129.31, 129.22, 129.155, 128.69, 128.35, 127.65, 124.66, 124.62 (d,  $J = 3.8$  Hz), 122.21, 120.63, 99.82 ((d,  $J = 298.2$  Hz), 73.22, 63.7, 62.69, 61.78, 47.60, 13.89, 13.74.

**HRMS** (ESI) calcd for  $\text{C}_{30}\text{H}_{28}\text{F}_3\text{NNaO}_7\text{S}^+$  ( $[\text{M}] + \text{Na}^+$ ) = 626.1431, Found 626.1438.

**$^{19}\text{F}\{^1\text{H}\}$  NMR** (376 MHz, Chloroform-*d*)  $\delta = -62.70$ .

**IR** (neat)  $\nu$  ( $\text{cm}^{-1}$ ): 2985, 1755, 1726, 1447, 1421, 1325, 1295, 1232, 1160, 1117, 1065, 1021, 899, 843, 759, 727, 688, 594, 574, 546, 462.

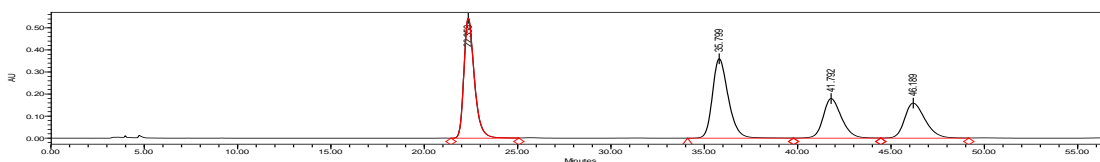

|   | Retention Time | % Area |
|---|----------------|--------|
| 1 | 22.358         | 31.66  |
| 2 | 35.799         | 31.78  |
| 3 | 41.792         | 18.36  |
| 4 | 46.189         | 18.20  |

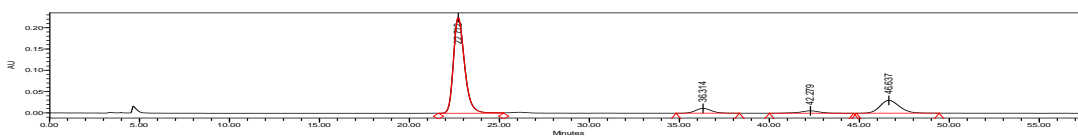

|   | Retention Time | % Area |
|---|----------------|--------|
| 1 | 22.712         | 74.18  |
| 2 | 36.314         | 5.35   |
| 3 | 42.279         | 3.21   |
| 4 | 46.637         | 17.27  |

**Diethyl (1*S*,5'*R*)-5'-([1,1'-biphenyl]-4-yl)-1'-(phenylsulfonyl)-3*H*-spiro[isobenzofuran-1,3'-pyrrolidine]-2',2'-dicarboxylate (3h)**

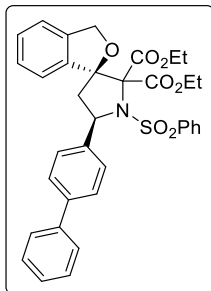

0.1 mmol scale reaction, 18 h, 39.1 mg, 54% yield; white foam. Melting point: 137 – 141 °C. 85:15 dr., 93% ee for the major isomer and 87% ee for the minor isomer.  $[\alpha]_{\lambda}^{17} = +76.8$  (c = 0.63 in CH<sub>2</sub>Cl<sub>2</sub>,  $\lambda = 405$  nm).

**HPLC** (Daicel chiralcel ADH, hexane/*i*-PrOH = 90/10, flow rate 1.0 mL/min,  $\lambda = 254$  nm)  $t_r$  (major-major) = 15.52 min,  $t_r$  (major-minor) = 28.01 min,  $t_r$  (minor-major) = 23.88 min,  $t_r$  (minor-minor) = 31.70 min.

**<sup>1</sup>H NMR** (400 MHz, Chloroform-*d*)  $\delta$  7.66 – 7.42 (m, 5H), 7.38 (dd,  $J = 14.0, 7.6$  Hz, 4H), 7.33 – 7.27 (m, 3H), 7.25 – 7.18 (m, 2H), 7.14 (t,  $J = 7.6$  Hz, 2H), 7.07 (t,  $J = 8.0$  Hz, 2H), 5.75 (d,  $J = 9.6$  Hz, 1H), 4.92 – 4.82 (m, 2H), 4.34 (dtq,  $J = 18.0, 10.8, 7.2$  Hz, 3H), 4.12 – 3.95 (m, 1H), 3.44 (dd,  $J = 13.6, 10.8$  Hz, 1H), 2.25 (dd,  $J = 13.6, 1.6$  Hz, 1H), 1.32 (t,  $J = 7.2$  Hz, 3H), 1.01 (t,  $J = 7.2$  Hz, 3H).

**<sup>13</sup>C{<sup>1</sup>H} NMR** (101 MHz, Chloroform-*d*)  $\delta$  167.73, 165.85, 140.72, 140.67, 140.45, 139.82, 136.75, 131.98, 129.10, 128.76, 128.74, 128.69, 127.61, 127.49, 127.16, 127.00, 126.61, 122.27, 120.59, 99.81, 73.20, 64.21, 62.58, 61.66, 47.79, 13.93, 13.75.

**HRMS** (ESI) calcd for C<sub>35</sub>H<sub>33</sub>NNaO<sub>7</sub>S<sup>+</sup> ([M]<sup>+</sup>+Na<sup>+</sup>) = 634.1870, Found 634.1875.

**IR** (neat)  $\nu$  (cm<sup>-1</sup>): 2984, 1755, 1725, 1484, 1447, 1340, 1293, 1231, 1158, 1118, 1092, 1064, 1024, 899, 843, 762, 729, 692, 608, 576, 520.

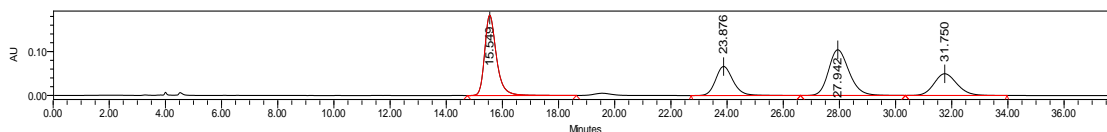

|   | Retention Time | % Area |
|---|----------------|--------|
| 1 | 15.549         | 32.64  |
| 2 | 23.876         | 17.56  |
| 3 | 27.942         | 32.47  |
| 4 | 31.750         | 17.33  |

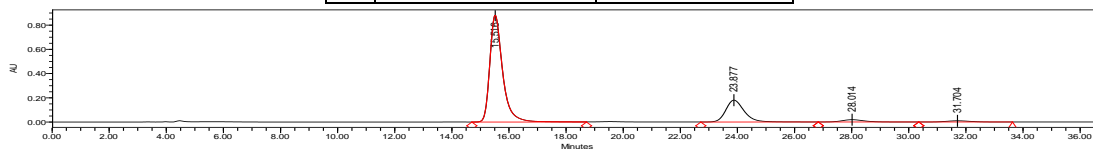

|   | Retention Time | % Area |
|---|----------------|--------|
| 1 | 15.516         | 73.94  |
| 2 | 23.877         | 21.75  |
| 3 | 28.014         | 2.79   |
| 4 | 31.704         | 1.53   |

**Diethyl (1*S*,5'*R*)-5'-(naphthalen-1-yl)-1'-(phenylsulfonyl)-3*H*-spiro[isobenzofuran-1,3'-pyrrolidine]-2',2'-dicarboxylate (3i)**

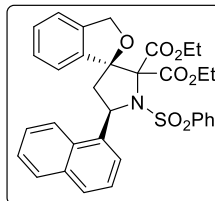

0.1 mmol scale reaction, 18h, 38.7 mg, 51% yield, white foam. Melting point: 123 – 125 °C. 95:5 dr, 94% ee for the major isomer and 77% ee for the minor isomer.  $[\alpha]_{\lambda}^{17} = +25.7$  ( $c = 0.66$  in  $\text{CH}_2\text{Cl}_2$ ,  $\lambda = 405$  nm).

**HPLC** (Daicel chiralcel ADH, hexane/*i*-PrOH = 90/10, flow rate 1.0 mL/min,  $\lambda = 254$  nm)  $t_r$  (major-major) = 11.23 min,  $t_r$  (major-minor) = 9.32 min,  $t_r$  (minor-major) = 20.63 min,  $t_r$  (minor-major) = 32.48 min.

**$^1\text{H}$  NMR** (400 MHz, Chloroform-*d*)  $\delta$  8.04 – 7.56 (m, 3H), 7.48 (t,  $J = 7.6$  Hz, 3H), 7.34 (dq,  $J = 15.6, 8.0, 7.6$  Hz, 2H), 7.22 – 6.95 (m, 6H), 6.94 – 6.51 (m, 2H), 6.47 – 6.30 (m, 1H), 5.26 – 4.77 (m, 1H), 4.71 – 4.53 (m, 1H), 4.48 – 4.22 (m, 3H), 4.11 – 3.72 (m, 1H), 3.62 – 3.24 (m, 1H), 2.20 (d,  $J = 13.2$  Hz, 1H), 1.34 (t,  $J = 7.2$  Hz, 3H), 0.91 (t,  $J = 7.2$  Hz, 3H).

**$^{13}\text{C}\{^1\text{H}\}$  NMR** (101 MHz, Chloroform-*d*)  $\delta$  167.75, 166.31, 133.40, 132.44, 129.43, 129.19, 128.25, 127.91, 127.74, 127.22, 126.89, 126.36, 126.01, 125.28, 125.01, 124.37, 123.34, 122.79, 122.27, 120.54, 100.05, 85.52, 73.18, 62.68, 62.25, 61.88, 61.18, 59.71, 48.91, 47.27, 14.14, 13.87, 13.51.

**HRMS** (ESI) calcd for  $\text{C}_{33}\text{H}_{31}\text{NNaO}_7\text{S}^+$  ( $[\text{M}]+\text{Na}^+$ ) = 608.1713, Found 608.1710.

**IR** (neat)  $\nu$  ( $\text{cm}^{-1}$ ): 3063, 2983, 1754, 1511, 1447, 1342, 1297, 1231, 1158, 1120, 1066, 1023, 900, 857, 802, 761, 728, 689, 606, 575, 499.

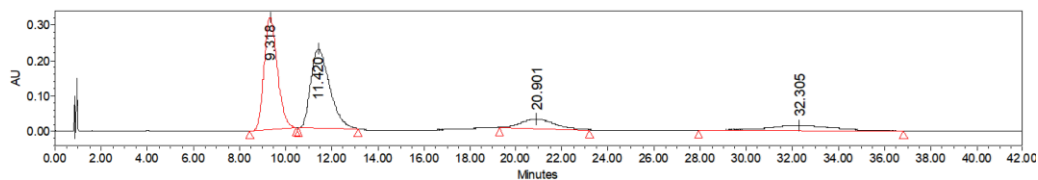

|   | Retention Time | % Area |
|---|----------------|--------|
| 1 | 9.318          | 41.64  |
| 2 | 11.420         | 41.52  |
| 3 | 20.901         | 8.45   |
| 4 | 32.305         | 8.39   |

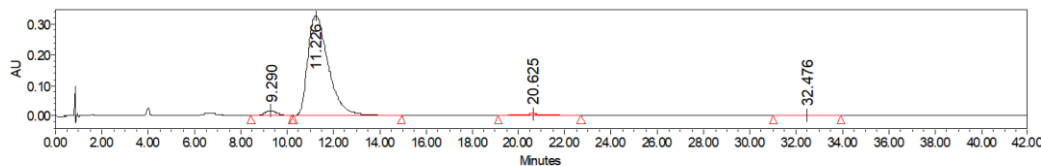

|   | Retention Time | % Area |
|---|----------------|--------|
| 1 | 9.290          | 2.97   |
| 2 | 11.226         | 94.78  |
| 3 | 20.625         | 2.01   |
| 4 | 32.476         | 0.24   |

**Diethyl (1*S*,5'*R*)-5'-(3-chlorophenyl)-1'-(phenylsulfonyl)-3*H*-spiro[isobenzofuran-1,3'-pyrrolidine]-2',2'-dicarboxylate (3j)**

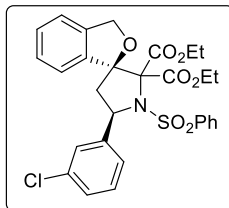

0.1 mmol scale reaction, 36 h, 43.9 mg, 77% yield, white foam. Melting point: 141 – 144 °C. 72:28 dr., 88% ee for the major isomer and 84% ee for the minor isomer.  $[\alpha]_D^{17} = +14.7$  ( $c = 1.18$  in  $\text{CH}_2\text{Cl}_2$ ).

**HPLC** (Daicel chiralcel ADH, hexane/*i*-PrOH = 85/15, flow rate 1.0 mL/min,  $\lambda = 254$  nm)  $t_r$  (major-major) = 11.97 min,  $t_r$  (major-minor) = 14.71 min,  $t_r$  (minor-major) = 19.75 min,  $t_r$  (minor-minor) = 16.41 min.

**$^1\text{H}$  NMR** (400 MHz, Chloroform-*d*)  $\delta$  7.71 (d,  $J = 8.0$  Hz, 1H), 7.56 (d,  $J = 8.0$  Hz, 1H), 7.51 – 7.33 (m, 4H), 7.32 – 7.28 (m, 2H), 7.24 (s, 3H), 7.19 – 7.02 (m, 2H), 5.78 (d,  $J = 10.4$  Hz, 1H), 4.95 (s, 2H), 4.45 (td,  $J = 7.2, 2.4$  Hz, 3H), 4.23 – 4.07 (m, 1H), 3.54 (dd,  $J = 13.2, 10.4$  Hz, 1H), 2.27 (d,  $J = 13.6$  Hz, 1H), 1.42 (t,  $J = 7.2$  Hz, 3H), 1.17 (t,  $J = 7.2$  Hz, 3H).

**$^{13}\text{C}\{^1\text{H}\}$  NMR** (101 MHz, Chloroform-*d*)  $\delta$  166.49, 164.61, 142.36, 139.66, 132.63, 131.40, 128.11, 127.97, 127.60, 127.42, 127.18, 126.84, 126.61, 125.92, 125.01, 121.18, 119.60, 98.85, 84.09, 72.19, 62.71, 61.58, 60.67, 49.18, 46.64, 12.92.

**HRMS** (ESI) calcd for  $\text{C}_{29}\text{H}_{28}^{35}\text{ClINNaO}_7\text{S}^+$  ( $[\text{M}]+\text{Na}^+$ ) = 592.1167, found 592.1168.

**HRMS** (ESI) calcd for  $\text{C}_{29}\text{H}_{28}^{37}\text{ClINNaO}_7\text{S}^+$  ( $[\text{M}]+\text{Na}^+$ ) = 594.1138, found 594.1138.

**IR** (neat)  $\nu$  ( $\text{cm}^{-1}$ ): 2984, 2361, 1754, 1725, 1587, 146, 1445, 1342, 1264, 1228, 1158, 1118, 1090, 1063, 1023, 900, 790, 759, 729, 688, 612, 579, 440.

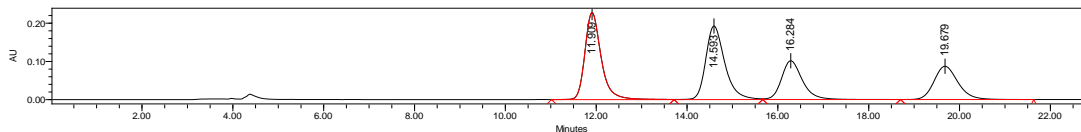

|   | Retention Time | % Area |
|---|----------------|--------|
| 1 | 11.909         | 31.85  |
| 2 | 14.593         | 31.66  |
| 3 | 16.284         | 18.41  |
| 4 | 19.679         | 18.08  |

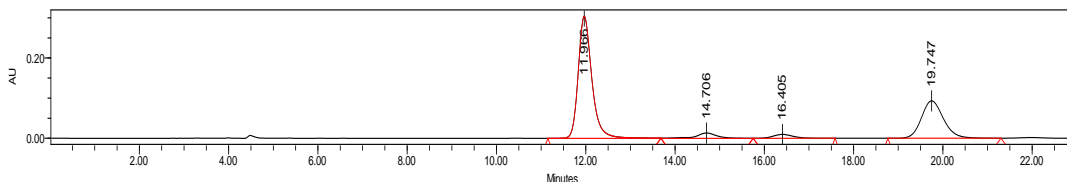

|   | Retention Time | % Area |
|---|----------------|--------|
| 1 | 11.966         | 62.10  |
| 2 | 14.706         | 4.11   |
| 3 | 16.405         | 2.91   |
| 4 | 19.747         | 30.88  |

**Diethyl (1*S*,5'*R*)-5'-(3-bromophenyl)-1'-(phenylsulfonyl)-3*H*-spiro[isobenzofuran-1,3'-pyrrolidine]-2',2'-dicarboxylate (3k)**

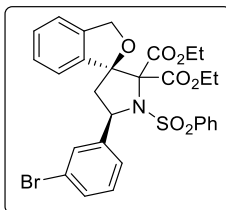

0.1 mmol scale reaction, 36 h, 45.4mg, 74% yield, white foam. Melting point: 149 – 152 °C. 70:30 dr., 92% ee for the major isomer and 66% ee for the minor isomer.  $[\alpha]_D^{17} = +19.0$  ( $c = 1.14$  in  $\text{CH}_2\text{Cl}_2$ ).

**HPLC** (Daicel chiralcel ADH, hexane/*i*-PrOH = 90/10, flow rate 1.0 mL/min,  $\lambda = 254$  nm)  $t_r$  (major-major) = 18.02 min,  $t_r$  (major-minor) = 20.09 min,  $t_r$  (minor-major) = 35.01 min,  $t_r$  (minor-minor) = 40.35 min.

**$^1\text{H}$  NMR** (400 MHz, Chloroform-*d*)  $\delta$  7.59 (d,  $J = 7.6$  Hz, 2H), 7.44 (d,  $J = 7.6$  Hz, 1H), 7.41 – 7.31 (m, 1H), 7.29 (d,  $J = 7.2$  Hz, 1H), 7.16 (dq,  $J = 15.4, 8.0, 8.0$  Hz, 7H), 6.89 (q,  $J = 8.0$  Hz, 1H), 5.65 (d,  $J = 10.4$  Hz, 1H), 4.83 (s, 1H), 4.43 – 4.22 (m, 3H), 4.03 (tq,  $J = 14.4, 7.6$  Hz, 1H), 3.41 (dd,  $J = 13.6, 10.8$  Hz, 1H), 2.19 – 2.09 (m, 1H), 1.30 (t,  $J = 7.2$  Hz, 3H), 1.06 (t,  $J = 7.2$  Hz, 3H).

**$^{13}\text{C}\{^1\text{H}\}$  NMR** (101 MHz, Chloroform-*d*)  $\delta$  166.47, 164.59, 142.62, 139.66, 139.20, 135.36, 130.73, 130.05, 128.86, 128.48, 128.28, 127.59, 127.40, 126.89, 126.65, 125.48, 121.66, 121.20, 120.89, 119.60, 98.87, 84.07, 72.19, 62.66, 62.03, 60.67, 46.65, 12.93, 12.78.

**HRMS** (ESI) calcd for  $\text{C}_{29}\text{H}_{28}^{79}\text{BrNNaO}_7\text{S}^+$  ( $[\text{M}]+\text{Na}^+$ ) = 636.0662, found 636.0660.

**HRMS** (ESI) calcd for  $\text{C}_{29}\text{H}_{28}^{81}\text{BrNNaO}_7\text{S}^+$  ( $[\text{M}]+\text{Na}^+$ ) = 638.0642, found 636.0645.

**IR** (neat)  $\nu$  ( $\text{cm}^{-1}$ ): 2983, 1754, 1726, 1570, 1475, 1446, 1342, 1263, 1229, 1157, 1091, 1063, 1023, 898, 860, 788, 759, 730, 688, 610, 577, 437.

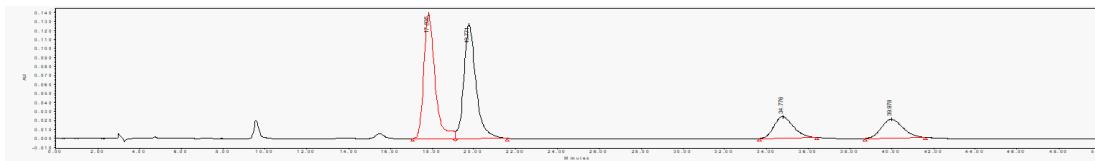

|   | Retention Time | % Area |
|---|----------------|--------|
| 1 | 17.835         | 38.71  |
| 2 | 19.771         | 38.43  |
| 3 | 34.776         | 11.63  |
| 4 | 39.978         | 11.23  |

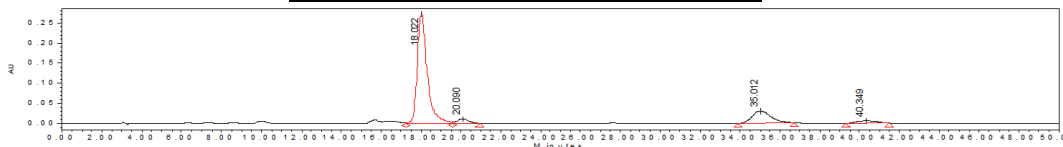

|   | Retention Time | % Area |
|---|----------------|--------|
| 1 | 18.022         | 77.57  |
| 2 | 20.090         | 3.23   |
| 3 | 35.012         | 15.91  |
| 4 | 40.349         | 3.29   |



**Diethyl (1*S*,5'*R*)-5'-(2-fluorophenyl)-1'-(phenylsulfonyl)-3*H*-spiro[isobenzofuran-1,3'-pyrrolidine]-2',2'-dicarboxylate (3l)**

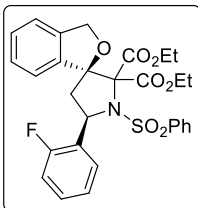

0.1 mmol scale reaction, 40 h, 43.1 mg, 76% yield, white foam. Melting point: 125 – 127 °C. 82:18 dr., 94% ee for the major isomer and 88% ee for the minor isomer.  $[\alpha]_D^{17} = +15.5$  (c = 1.18 in CH<sub>2</sub>Cl<sub>2</sub>).

**HPLC** (Daicel chiralcel ADH, hexane/*i*-PrOH = 90/10, flow rate 1.0 mL/min,  $\lambda = 254$  nm)  $t_r$  (major-major) = 17.73 min,  $t_r$  (major-minor) = 8.71 min,  $t_r$  (minor-major) = 16.46 min,  $t_r$  (minor-minor) = 10.44 min.

**<sup>1</sup>H NMR** (400 MHz, Chloroform-*d*)  $\delta$  7.65 (d,  $J = 7.2$  Hz, 2H), 7.51 (d,  $J = 7.6$  Hz, 1H), 7.33 – 7.28 (m, 1H), 7.23 – 7.16 (m, 2H), 7.09 (s, 2H), 7.07 – 6.98 (m, 2H), 6.96 – 6.72 (m, 2H), 6.48 (t,  $J = 7.6$  Hz, 1H), 5.92 (d,  $J = 10.4$  Hz, 1H), 4.77 – 4.66 (m, 2H), 4.26 (dddd,  $J = 27.2, 11.2, 8.8, 5.6$  Hz, 3H), 4.03 – 3.88 (m, 1H), 3.38 (dd,  $J = 13.4, 10.2$  Hz, 1H), 2.08 (d,  $J = 13.2$  Hz, 1H), 1.25 (t,  $J = 7.2$  Hz, 3H), 0.99 (t,  $J = 7.2$  Hz, 3H).

**<sup>13</sup>C{<sup>1</sup>H} NMR** (101 MHz, Chloroform-*d*)  $\delta$  167.38, 166.14, 160.91, 158.47 (d,  $J = 244.0$  Hz), 140.94, 140.67 (d,  $J = 15.0$  Hz), 140.12, 136.45, 132.43, 130.35 (d,  $J = 3.6$  Hz), 129.12, 128.84 (d,  $J = 5.6$  Hz), 128.09, 128.01, 127.58, 123.07 (d,  $J = 3.4$  Hz), 122.25, 120.56, 114.27, 114.06, 100.02, 73.21, 62.66, 61.76 (d,  $J = 4.6$  Hz), 57.60, 46.96, 13.89, 13.76.

**<sup>19</sup>F{<sup>1</sup>H} NMR** (376 MHz, CDCl<sub>3</sub>)  $\delta = -119.26$ .

**HRMS** (ESI) calcd for C<sub>29</sub>H<sub>28</sub>FNNaO<sub>7</sub>S<sup>+</sup> ([M]<sup>+</sup>+Na<sup>+</sup>) = 576.1463, Found 567.1467.

**IR** (neat)  $\nu$  (cm<sup>-1</sup>): 2984, 1753, 1726, 1616, 1587, 1486, 1453, 1342, 1293, 1233, 1158, 1092, 1065, 1044, 1023, 901, 861, 815, 758, 730, 689, 608, 575, 555, 513.

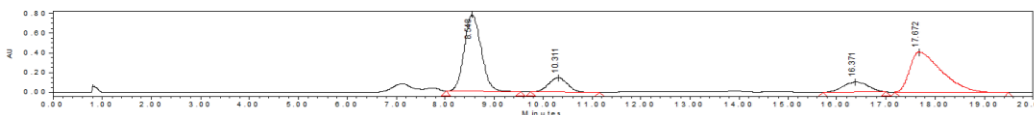

|   | Retention Time | % Area |
|---|----------------|--------|
| 1 | 8.548          | 42.39  |
| 2 | 10.311         | 8.53   |
| 3 | 16.371         | 7.91   |
| 4 | 17.672         | 41.17  |

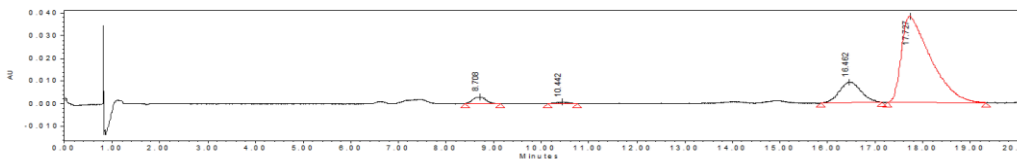

|   | Retention Time | % Area |
|---|----------------|--------|
| 1 | 8.708          | 2.65   |
| 2 | 10.442         | 0.42   |
| 3 | 16.462         | 14.16  |
| 4 | 17.727         | 82.77  |

**Diethyl (1*S*,5'*R*)-5'-(2-chlorophenyl)-1'-(phenylsulfonyl)-3*H*-spiro[isobenzofuran-1,3'-pyrrolidine]-2',2'-dicarboxylate (3m)**

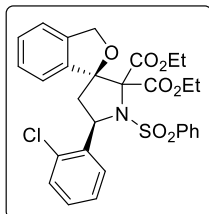

0.1 mmol scale reaction, 40 h, 46.2 mg, 81% yield, white foam. Melting point: 152 – 153 °C. 56:43 dr., 93% ee for the major isomer and 87% ee for the minor isomer.  $[\alpha]_D^{26} = +31.7$  ( $c = 1.17$  in  $\text{CH}_2\text{Cl}_2$ ,  $\lambda = 405$  nm).

**HPLC** (Daicel chiralcel ASH, hexane/*i*-PrOH = 85/15, flow rate 1.0 mL/min,  $\lambda = 254$  nm)  $t_r$  (major-major) = 9.74 min,  $t_r$  (major-minor) = 8.42 min,  $t_r$  (minor-major) = 10.58 min,  $t_r$  (minor-minor) = 7.21 min.

**$^1\text{H}$  NMR** (400 MHz, Chloroform-*d*)  $\delta$  7.73 (d,  $J = 9.6$  Hz, 2H), 7.46 – 7.27 (m, 4H), 7.25 – 7.04 (m, 5H), 6.96 (td,  $J = 7.6, 1.6$  Hz, 1H), 6.77 – 6.65 (m, 1H), 6.02 (d,  $J = 10$  Hz, 1H), 4.79 (q,  $J = 12.4$  Hz, 2H), 4.49 – 4.32 (m, 3H), 4.15 – 3.93 (m, 1H), 3.60 – 3.39 (m, 1H), 2.19 (d,  $J = 12.4$  Hz, 1H), 1.35 (t,  $J = 7.2$  Hz, 3H), 1.10 (t,  $J = 7.2$  Hz, 3H).

**$^{13}\text{C}\{^1\text{H}\}$  NMR** (101 MHz, Chloroform-*d*)  $\delta$  167.37, 166.20, 140.68, 138.14, 132.46, 130.45, 129.10, 128.89, 128.42, 127.79, 127.72, 127.55, 125.66, 122.28, 120.54, 99.97, 85.49, 73.18, 62.65, 61.75, 61.39, 46.70, 13.88, 13.76.

**HRMS** (ESI) calcd for  $\text{C}_{29}\text{H}_{28}^{35}\text{ClNNaO}_7\text{S}^+$  ( $[\text{M}] + \text{Na}^+$ ) = 592.1167, found 592.1169.

**HRMS** (ESI) calcd for  $\text{C}_{29}\text{H}_{28}^{37}\text{ClNNaO}_7\text{S}^+$  ( $[\text{M}] + \text{Na}^+$ ) = 594.1138, found 594.1141.

**IR** (neat)  $\nu$  ( $\text{cm}^{-1}$ ): 2984, 1753, 1726, 1472, 1446, 1342, 1293, 1232, 1158, 1092, 1052, 1024, 957, 901, 859, 757, 730, 689, 608, 576, 549, 494, 459.

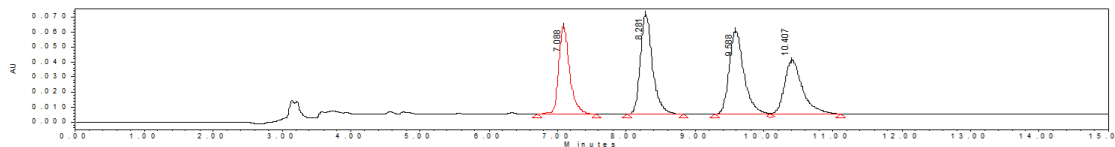

|   | Retention Time | % Area |
|---|----------------|--------|
| 1 | 7.088          | 21.99  |
| 2 | 8.281          | 27.90  |
| 3 | 9.588          | 28.15  |
| 4 | 10.407         | 21.97  |

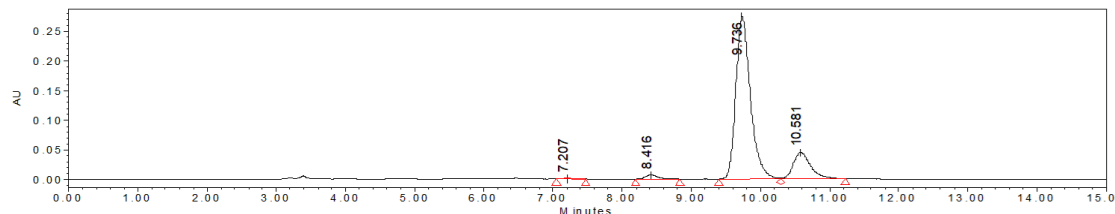

|   | Retention Time | % Area |
|---|----------------|--------|
| 1 | 7.207          | 1.86   |
| 2 | 8.416          | 2.07   |
| 3 | 9.736          | 84.53  |
| 4 | 10.581         | 11.54  |

**Diethyl (1*S*,5'*R*)-5'-(2-bromophenyl)-1'-(phenylsulfonyl)-3*H*-spiro[isobenzofuran-1,3'-pyrrolidine]-2',2'-dicarboxylate (3n)**

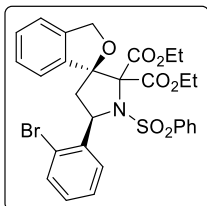

0.1 mmol scale reaction, 40 h, 46.0 mg, 75% yield, white foam. Melting point: 142 – 144 °C. 53:47 dr., 95% ee for the major isomer and 67% ee for the minor isomer.  $[\alpha]_{\lambda}^{26} = +42.3$  ( $c = 1.01$  in  $\text{CH}_2\text{Cl}_2$ ,  $\lambda = 405$  nm).

**HPLC** (Daicel chiralcel ASH, hexane/*i*-PrOH = 80/20, flow rate 1.0 mL/min,  $\lambda = 254$  nm)  $t_r$  (major-major) = 8.18 min,  $t_r$  (major-minor) = 7.19 min,  $t_r$  (minor-major) = 8.78 min,  $t_r$  (minor-minor) = 6.36 min.

**$^1\text{H}$  NMR** (400 MHz, Chloroform-*d*)  $\delta$  7.76 – 7.61 (m, 2H), 7.49 – 7.29 (m, 4H), 7.25 – 7.11 (m, 4H), 7.01 (t,  $J = 7.6$  Hz, 1H), 6.89 (td,  $J = 7.6, 1.6$  Hz, 1H), 6.76 (dt,  $J = 22.2, 7.2$  Hz, 1H), 5.96 (d,  $J = 10.0$  Hz, 1H), 4.79 (q,  $J = 12.4$  Hz, 2H), 4.48 – 4.33 (m, 3H), 4.09 (dq,  $J = 10.8, 7.2$  Hz, 1H), 3.56 – 3.39 (m, 1H), 2.20 (d,  $J = 14.4$  Hz, 1H), 1.34 (t,  $J = 7.2$  Hz, 3H), 1.10 (t,  $J = 7.2$  Hz, 3H).

**$^{13}\text{C}\{^1\text{H}\}$  NMR** (101 MHz, Chloroform-*d*)  $\delta$  167.38, 166.20, 136.46, 132.45, 131.72, 130.78, 129.10, 128.90, 128.05, 127.79, 127.55, 126.26, 122.29, 120.54, 99.89, 73.19, 63.67, 62.66, 61.76, 46.83, 13.88, 13.76.

**HR-MS** (ESI) calcd for  $\text{C}_{29}\text{H}_{28}^{79}\text{BrNNaO}_7\text{S}^+$  ( $[\text{M}]+\text{Na}^+$ ) = 636.0662, found 636.0662.

**HR-MS** (ESI) calcd for  $\text{C}_{29}\text{H}_{28}^{81}\text{BrNNaO}_7\text{S}^+$  ( $[\text{M}]+\text{Na}^+$ ) = 638.0642, found 638.0645.

**IR** (neat)  $\nu$  ( $\text{cm}^{-1}$ ): 2983, 1753, 1726, 1466, 1444, 1342, 1293, 1231, 1158, 1021, 900, 858, 802, 730, 607, 574, 548, 489, 443.

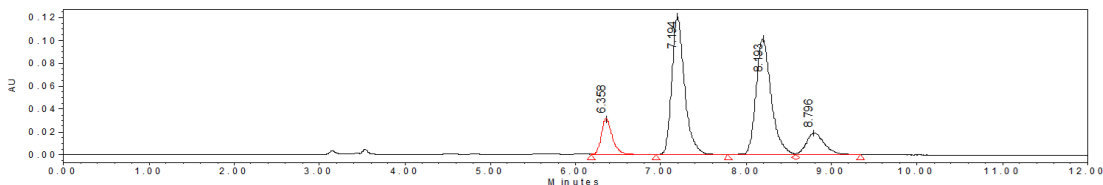

|   | Retention Time | % Area |
|---|----------------|--------|
| 1 | 6.358          | 9.11   |
| 2 | 7.194          | 40.80  |
| 3 | 8.193          | 40.72  |
| 4 | 8.796          | 9.37   |

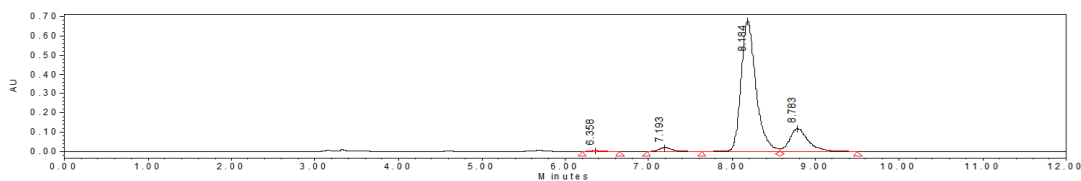

|   | Retention Time | % Area |
|---|----------------|--------|
| 1 | 6.358          | 0.36   |
| 2 | 7.193          | 1.85   |
| 3 | 8.184          | 80.60  |
| 4 | 8.783          | 17.19  |

**Diethyl (1*S*,5'*R*)-1'-(phenylsulfonyl)-5'-(*o*-tolyl)-3*H*-spiro[isobenzofuran-1,3'-pyrrolidine]-2',2'-dicarboxylate (3o)**

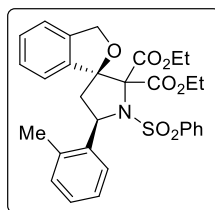

0.1 mmol scale reaction, 28 h, 36.8 mg, 67% yield, white foam. Melting point: 121 – 123 °C. 61:39 dr., 90% ee for the major isomer and 83% ee for the minor isomer.  $[\alpha]_D^{17} = +14.8$  (c = 0.51 in CH<sub>2</sub>Cl<sub>2</sub>).

**HPLC** (Daicel chiralcel ASH, hexane/*i*-PrOH = 80/20, flow rate 1.0 mL/min,  $\lambda = 254$  nm)  $t_r$  (major-major) = 4.52 min,  $t_r$  (major-minor) = 3.29 min,  $t_r$  (minor-major) = 7.07 min,  $t_r$  (minor-minor) = 8.93 min.

**<sup>1</sup>H NMR** (400 MHz, Chloroform-*d*)  $\delta$  7.57 (d,  $J = 7.6$  Hz, 2H), 7.42 (d,  $J = 7.6$  Hz, 1H), 7.38 – 7.27 (m, 3H), 7.18 (dd,  $J = 11.6, 7.2$  Hz, 5H), 7.13 – 7.07 (m, 1H), 7.06 – 6.92 (m, 2H), 6.62 (t,  $J = 7.6$  Hz, 1H), 5.95 (d,  $J = 10.4$  Hz, 1H), 4.84 (s, 1H), 4.40 (dt,  $J = 14.4, 11.2, 7.2$  Hz, 3H), 4.05 (ddd,  $J = 12.6, 10.8, 7.2$  Hz, 1H), 3.60 – 3.42 (m, 1H), 2.42 (m, 3H), 2.13 (d,  $J = 13.2$  Hz, 1H), 1.41 (t,  $J = 7.2$  Hz, 3H), 1.03 (t,  $J = 7.2$  Hz, 3H).

**<sup>13</sup>C{<sup>1</sup>H} NMR** (101 MHz, Chloroform-*d*)  $\delta$  140.75, 138.87, 134.09, 132.14, 130.21, 129.41, 129.03, 128.80, 127.50, 126.50, 125.35, 122.85, 122.28, 120.55, 100.09, 73.17, 62.56, 62.00, 60.97, 59.39, 49.72, 46.72, 13.98, 13.75.

**HR-MS** (ESI) calcd for C<sub>29</sub>H<sub>29</sub>NNaO<sub>7</sub>S<sup>+</sup> ([M]<sup>+</sup>+Na<sup>+</sup>) = 572.1713; found 572.1717.

**IR** (neat)  $\nu$  (cm<sup>-1</sup>): 2982, 1753, 1725, 1446, 1365, 1339, 1263, 1228, 1156, 1092, 1064, 1023, 898, 860, 803, 757, 728, 688, 607, 574, 551, 460.

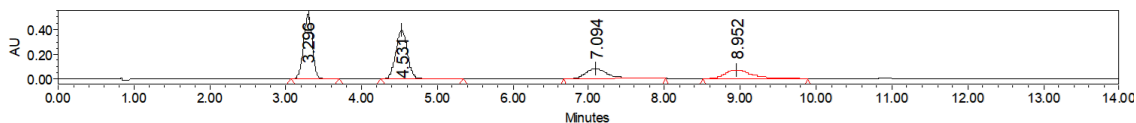

|   | Retention Time | % Area |
|---|----------------|--------|
| 1 | 3.296          | 35.45  |
| 2 | 4.531          | 35.26  |
| 3 | 7.094          | 14.28  |
| 4 | 8.952          | 15.02  |

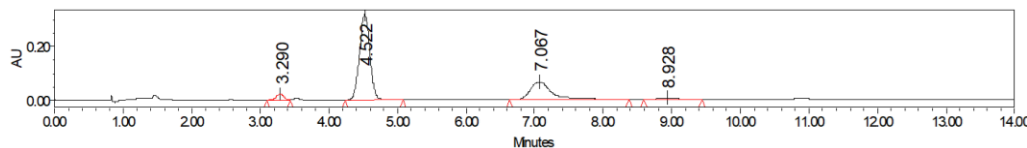

|   | Retention Time | % Area |
|---|----------------|--------|
| 1 | 3.290          | 3.42   |
| 2 | 4.522          | 64.99  |
| 3 | 7.067          | 29.04  |
| 4 | 8.928          | 2.55   |

**Diethyl (1*S*,5'*R*)-5'-phenyl-1'-tosyl-3*H*-spiro[isobenzofuran-1,3'-pyrrolidine]-2',2'-dicarboxylate (3p)**

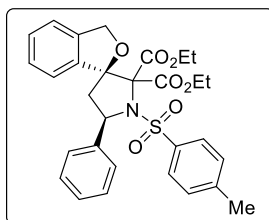

0.1 mmol scale reaction, 18 h, 33.5 mg, 61% yield; white foam. Melting point: 157 – 160 °C. 79:21 d.r., 93% ee for the major isomer and 46% ee for the minor isomer.  $[\alpha]_D^{17} = +47.7$  ( $c = 0.77$  in  $\text{CH}_2\text{Cl}_2$ ,  $\lambda = 405$  nm).

**HPLC** (Daicel chiralcel ADH, hexane/*i*-PrOH = 90/10, flow rate 1.0 mL/min,  $\lambda = 254$  nm)  $t_r$  (major -major) = 14.94 min,  $t_r$  (major-minor) = 23.82 min,  $t_r$  (minor-major) = 17.57 min,  $t_r$  (minor-minor) = 20.94 min.

**$^1\text{H}$  NMR** (400 MHz, Chloroform-*d*)  $\delta$  7.40 – 7.33 (m, 4H), 7.32 – 7.27 (m, 2H), 7.20 – 7.15 (d,  $J = 8.0$  Hz, 2H), 7.11 – 7.00 (m, 3H), 6.93 (t,  $J = 8.0$  Hz, 2H), 5.72 (d,  $J = 9.2$  Hz, 1H), 4.89 (s, 2H), 4.47 – 4.23 (m, 3H), 4.11 – 3.99 (m, 1H), 3.44 (dd,  $J = 13.6, 10.8$  Hz, 1H), 2.32 (s, 1H), 2.30 – 2.21 (m, 3H), 1.35 (t,  $J = 7.2$  Hz, 3H), 1.05 (t,  $J = 7.2$  Hz, 3H).

**$^{13}\text{C}\{^1\text{H}\}$  NMR** (101 MHz, Chloroform-*d*)  $\delta$  167.80, 165.91, 142.61, 141.49, 140.69, 137.91, 136.84, 129.00, 128.89, 128.64, 128.34, 128.24, 128.07, 127.89, 127.77, 127.52, 126.78, 122.27, 120.52, 99.76, 73.09, 64.40, 62.47, 61.56, 47.85, 21.40, 13.89, 13.69.

**HR-MS** (ESI) calcd for  $\text{C}_{30}\text{H}_{31}\text{NNaO}_7\text{S}^+$  ( $[\text{M}] + \text{Na}^+$ ) = 572.1713, found 572.1715.

**IR** (neat)  $\nu$  ( $\text{cm}^{-1}$ ): 2983, 1753, 1723, 1451, 1361, 1351, 11264 1211, 1021, 755, 728, 689, 605, 571, 545, 471.

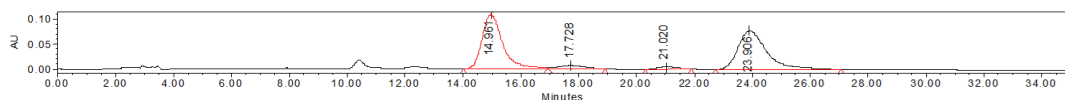

|   | Retention Time | % Area |
|---|----------------|--------|
| 1 | 14.961         | 47.47  |
| 2 | 17.728         | 3.62   |
| 3 | 21.020         | 1.81   |
| 4 | 23.906         | 47.10  |

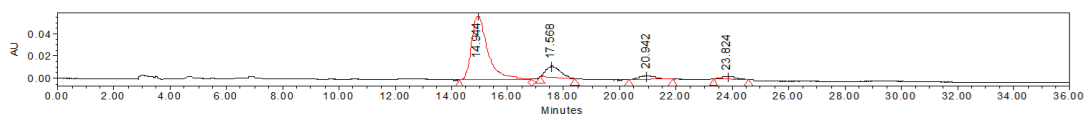

|   | Retention Time | % Area |
|---|----------------|--------|
| 1 | 14.944         | 80.28  |
| 2 | 17.568         | 12.22  |
| 3 | 20.942         | 4.59   |
| 4 | 23.824         | 2.91   |

**ent-L<sub>3</sub>-RaEt<sub>2</sub>** was used. 67% yield, 14:86 d.r., -93/-43% ee.  $[\alpha]_D^{17} = -34.2$  ( $c = 0.56$  in  $\text{CH}_2\text{Cl}_2$ ,  $\lambda = 405$  nm).

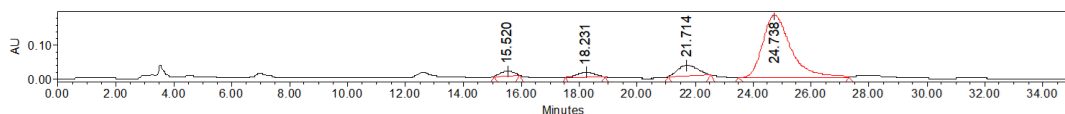

|   | Retention Time | % Area |
|---|----------------|--------|
| 1 | 15.520         | 2.80   |
| 2 | 18.231         | 3.86   |
| 3 | 21.714         | 9.69   |

|   |        |       |
|---|--------|-------|
| 4 | 24.738 | 83.66 |
|---|--------|-------|

**Diethyl (1*S*,5'*R*)-5'-phenyl-1'-(*o*-tolylsulfonyl)-3*H*-spiro[isobenzofuran-1,3'-pyrrolidine]-2',2'-dicarboxylate (3q)**

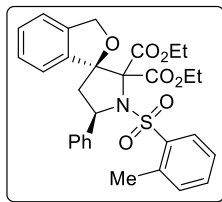

0.1 mmol scale reaction, 18 h, 33.5 mg, 77% yield; white foam. Melting point: 132 – 135 °C. >19:1 dr., 95% ee.  $[\alpha]_D^{25} = +41.4$  ( $c = 0.38$  in  $\text{CH}_2\text{Cl}_2$ ,  $\lambda = 405$  nm).

**HPLC** (Daicel chiralcel ASH, hexane/*i*-PrOH = 85/15, flow rate 1.0 mL/min,  $\lambda = 254$  nm)  $t_r$  (major- major) = 12.43 min,  $t_r$  (major-minor) = 14.07 min.

**$^1\text{H}$  NMR** (400 MHz, Chloroform-*d*)  $\delta$  7.77 (d,  $J = 8.0$  Hz, 1H), 7.51 (d,  $J = 5.4$  Hz, 2H), 7.33 (dt,  $J = 21.6$ , 7.2 Hz, 2H), 7.18 (dd,  $J = 15.2$ , 7.6 Hz, 3H), 7.11 (d,  $J = 5.6$  Hz, 3H), 7.00 – 6.91 (m, 2H), 5.78 (d,  $J = 10.8$  Hz, 1H), 5.00 (q,  $J = 12.0$  Hz, 2H), 4.38 (q,  $J = 7.2$  Hz, 2H), 4.25 – 4.14 (m, 1H), 4.04 – 3.93 (m, 1H), 3.60 – 3.46 (m, 1H), 2.43 (d,  $J = 13.2$  Hz, 1H), 2.38 (s, 3H), 1.34 (t,  $J = 7.2$  Hz, 3H), 0.95 (t,  $J = 7.2$  Hz, 3H).

**$^{13}\text{C}\{^1\text{H}\}$  NMR** (101 MHz, Chloroform-*d*)  $\delta$  167.77, 165.56, 141.16, 140.78, 137.06, 131.53, 131.43, 129.86, 129.06, 128.73, 127.81, 127.54, 127.12, 124.80, 122.33, 120.61, 99.55, 73.25, 64.23, 62.50, 61.55, 47.42, 20.82, 13.90, 13.56.

**HR-MS** (ESI) calcd for  $\text{C}_{30}\text{H}_{31}\text{NNaO}_7\text{S}^+$  ( $[\text{M}] + \text{Na}^+$ ) = 572.1713, found 572.1715.

**IR** (neat)  $\nu$  ( $\text{cm}^{-1}$ ): 2983, 1757, 1727, 1459, 1366, 1333, 1233, 1159, 1063, 1025, 898, 758, 734, 704, 608.6, 585, 550, 493.

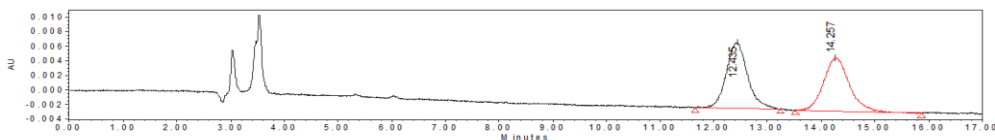

|   | Retention Time | % Area |
|---|----------------|--------|
| 2 | 14.257         | 49.72  |
| 1 | 12.435         | 50.28  |

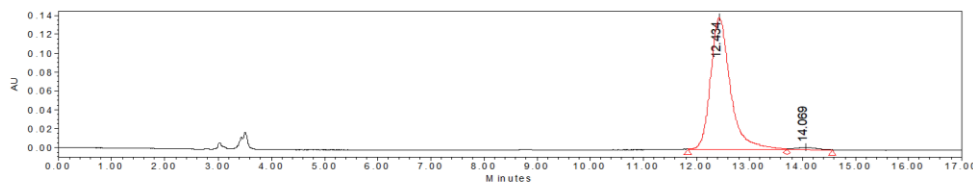

|   | Retention Time | % Area |
|---|----------------|--------|
| 1 | 12.434         | 97.63  |
| 2 | 14.069         | 2.37   |

**Diethyl (1*S*,5'*R*)-1'-((4-chlorophenyl)sulfonyl)-5'-phenyl-3*H*-spiro[isobenzofuran-1,3'-pyrrolidine]-2',2'-dicarboxylate (3r)**

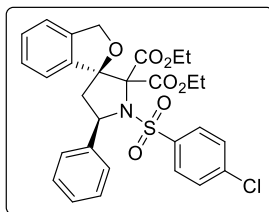

0.1 mmol scale reaction, 36 h, 38.8 mg, 68% yield; white foam. Melting point: 172 – 174 °C. 67:23 dr, 88% ee for the major isomer and 82% ee for the minor isomer.  $[\alpha]_D^{17} = +17.8$  (c = 0.67 in CH<sub>2</sub>Cl<sub>2</sub>, λ = 405 nm).

**HPLC** (Daicel chiralcel ADH, hexane/*i*-PrOH = 90/10, flow rate 1.0 mL/min, λ = 254 nm)  $t_r$  (major-major) = 11.97 min,  $t_r$  (major-minor) = 14.71 min,  $t_r$  (minor-major) = 19.75 min,  $t_r$  (minor-minor) = 16.41 min.

**<sup>1</sup>H NMR** (400 MHz, Chloroform-*d*) δ 7.70 – 7.50 (m, 2H), 7.48 – 7.38 (m, 2H), 7.37 – 7.28 (m, 2H), 7.23 (d, *J* = 10.5 Hz, 1H), 7.18 (t, *J* = 8.8 Hz, 5H), 7.10 (s, 1H), 5.68 (d, *J* = 9.6 Hz, 1H), 4.87 (s, 1H), 4.50 – 4.23 (m, 3H), 4.07 (ddt, *J* = 25.0, 10.8, 7.2 Hz, 1H), 3.45 (dd, *J* = 13.2, 10.8 Hz, 1H), 2.81 – 2.59 (m, 1H), 2.17 (d, *J* = 13.2 Hz, 1H), 1.34 (t, *J* = 7.2 Hz, 3H), 1.09 – 1.00 (t, *J* = 7.2 Hz, 3H).

**<sup>13</sup>C{<sup>1</sup>H} NMR** (101 MHz, Chloroform-*d*) δ 140.59, 140.43, 136.49, 132.27, 130.98, 130.79, 129.85, 129.13, 128.69, 128.46, 127.90, 127.64, 127.60, 99.77, 63.73, 62.61, 61.69, 47.70, 13.87, 13.71.

**HR-MS** (ESI) calcd for C<sub>29</sub>H<sub>28</sub><sup>35</sup>CINNaO<sub>7</sub>S<sup>+</sup> ([M]+Na<sup>+</sup>) = 592.1167, found 592.1167.

**HR-MS** (ESI) calcd for C<sub>29</sub>H<sub>28</sub><sup>37</sup>CINNaO<sub>7</sub>S<sup>+</sup> ([M]+Na<sup>+</sup>) = 594.1138, found 592.1140.

**IR** (neat) ν (cm<sup>-1</sup>): 3273, 2984, 1735, 1583, 1474, 1494, 1370, 1225, 1163, 1090, 1025, 856, 754, 620, 552, 481.

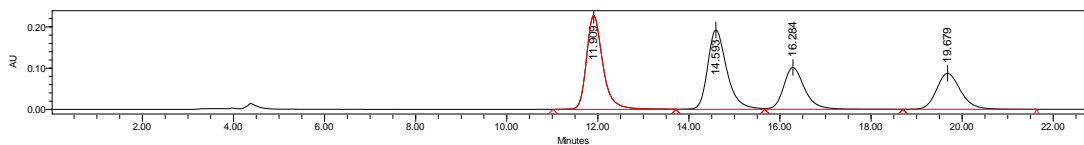

|   | Retention Time | % Area |
|---|----------------|--------|
| 1 | 11.909         | 31.85  |
| 2 | 14.593         | 31.66  |
| 3 | 16.284         | 18.41  |
| 4 | 19.679         | 18.08  |

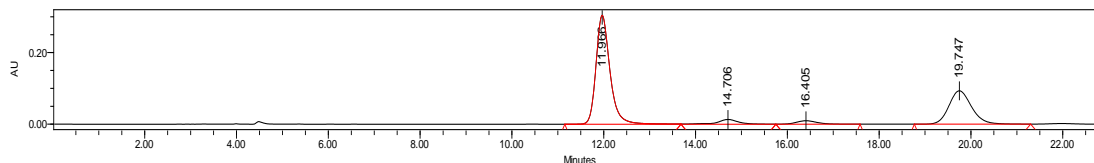

|   | Retention Time | % Area |
|---|----------------|--------|
| 1 | 11.966         | 62.10  |
| 2 | 14.706         | 4.11   |
| 3 | 16.405         | 2.91   |
| 4 | 19.747         | 30.88  |

Diethyl (1*S*,5'*R*)-5-fluoro-5'-phenyl-1'-(*o*-tolylsulfonyl)-3*H*-spiro[isobenzofuran-1,3'-pyrrolidine]-2',2'-dicarboxylate (3s)

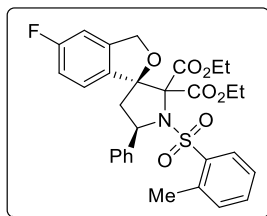

0.1 mmol scale reaction, 36 h, 32.3 mg, 57% yield, white foam. Melting point: 128 – 130 °C. >19:1 dr., 95% ee.  $[\alpha]_D^{26} = +27.33$  (c = 0.75 in CH<sub>2</sub>Cl<sub>2</sub>,  $\lambda = 405$  nm).

HPLC (Daicel chiralcel IF, hexane/i-PrOH = 90/10, flow rate 1.0 mL/min,  $\lambda = 254$  nm)  $t_r$  (major) = 3.53 min,  $t_r$  (minor) = 6.05 min.

<sup>1</sup>H NMR (400 MHz, Chloroform-*d*)  $\delta$  7.75 (d,  $J = 8.0$  Hz, 1H), 7.55 – 7.42 (m, 3H), 7.21 – 7.10 (m, 4H), 7.02 – 6.88 (m, 4H), 5.78 (d,  $J = 9.2$  Hz, 1H), 4.95 (q,  $J = 12.8$  Hz, 2H), 4.37 (q,  $J = 7.2$  Hz, 2H), 4.26 – 4.15 (m, 1H), 4.02 (dt,  $J = 10.8, 7.2$  Hz, 1H), 3.51 (dd,  $J = 13.6, 10.8$  Hz, 1H), 2.48 – 2.31 (m, 4H), 1.34 (t,  $J = 7.2$  Hz, 3H), 0.99 (t,  $J = 7.2$  Hz, 3H).

<sup>13</sup>C{<sup>1</sup>H} NMR (101 MHz, Chloroform-*d*) 167.83, 165.54, 164.83 (d,  $J = 246.2$  Hz), 162.37, 143.30 (d,  $J = 8.8$  Hz), 141.04, 139.74, 137.15, 132.44 (d,  $J = 2.4$  Hz), 131.50, 129.87, 128.59, 127.84, 127.16, 123.90 (d,  $J = 9.4$  Hz), 123.81, 115.06 (d,  $J = 23.2$  Hz), 114.83, 108.12 (d,  $J = 23.8$  Hz), 107.88, 99.22, 85.23, 72.74, 64.09, 62.64, 61.67, 47.46, 20.80, 13.91, 13.63.

<sup>19</sup>F{<sup>1</sup>H} NMR (376 MHz, Chloroform-*d*)  $\delta = -113.08$ .

HR-MS (ESI) calcd for C<sub>30</sub>H<sub>30</sub>FNNaO<sub>7</sub>S<sup>+</sup> ([M]<sup>+</sup>+Na<sup>+</sup>) = 590.1619; found 590.1620.

IR (neat)  $\nu$  (cm<sup>-1</sup>): 3061, 2982, 2448, 1750, 1487, 1452, 1340, 1257, 1160, 1036, 941, 870, 757, 700, 608, 579, 464.

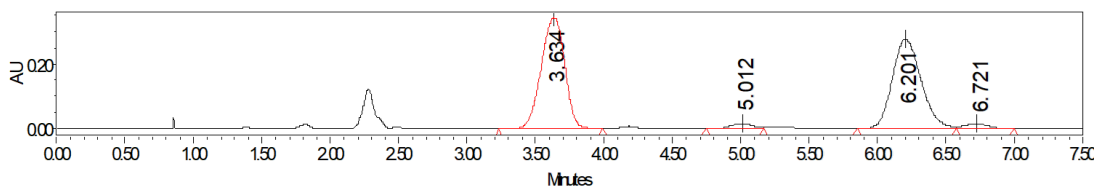

|   | Retention Time | % Area |
|---|----------------|--------|
| 1 | 3.634          | 47.82  |
| 2 | 5.012          | 2.36   |
| 3 | 6.201          | 47.41  |
| 4 | 6.721          | 2.40   |

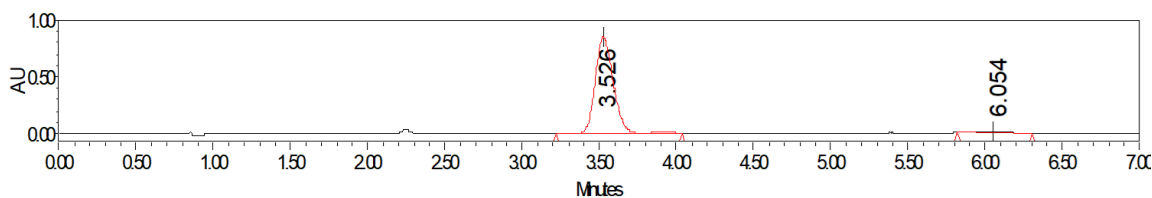

|   | Retention Time | % Area |
|---|----------------|--------|
| 1 | 3.526          | 97.46  |
| 2 | 6.054          | 2.54   |

**Diethyl (1*S*,5'*R*)-6-methyl-5'-phenyl-1'-(*o*-tolylsulfonyl)-3*H*-spiro[isobenzofuran-1,3'-pyrrolidine]-2',2'-dicarboxylate (3t)**



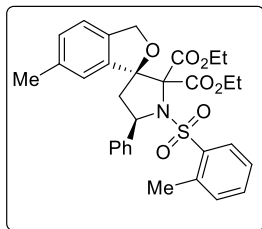

0.1 mmol scale reaction, 36 h, 41.0 mg, 73 % yield, white foam. Melting point: 118 – 120 °C. 55:45 dr., 93% ee for the major isomer and 88% ee for the minor isomer.  $[\alpha]_D^{26} = +32.1$  (c = 1.42 in CH<sub>2</sub>Cl<sub>2</sub>, λ = 405 nm).

**HPLC** (Daicel chiralcel ADH, hexane/*i*-PrOH = 85/15, flow rate 1.0 mL/min, λ = 254 nm)  $t_r$  (major -major) = 12.93 min,  $t_r$  (major-minor) = 19.67 min,  $t_r$  (minor-major) = 16.08 min,  $t_r$  (minor-minor) = 12.27 min.

**<sup>1</sup>H NMR** (400 MHz, Chloroform-*d*) δ 7.97 (dd, *J* = 8.0, 1.2 Hz, 1H), 7.72 (dd, *J* = 5.6, 3.2 Hz, 1H), 7.53 (dd, *J* = 5.6, 3.2 Hz, 1H), 7.29 (d, *J* = 7.0 Hz, 3H), 7.25 – 7.21 (m, 1H), 7.16 (s, 1H), 7.12 (dd, *J* = 7.8, 1.8 Hz, 2H), 7.06 (t, *J* = 7.2 Hz, 2H), 7.01 (s, 1H), 6.94 (d, *J* = 7.2 Hz, 2H), 5.56 (t, *J* = 7.6 Hz, 1H), 5.09 (d, *J* = 12.4 Hz, 1H), 4.99 (d, *J* = 12.4 Hz, 1H), 4.39 – 4.25 (m, 3H), 4.12 (dq, *J* = 10.8, 7.2 Hz, 1H), 3.84 (dq, *J* = 10.8, 7.2 Hz, 1H), 2.99 (dd, *J* = 13.2, 7.6 Hz, 1H), 2.81 – 2.76 (m, 1H), 2.19 (s, 3H), 1.30 (t, *J* = 7.2 Hz, 4H), 1.10 (t, *J* = 7.2 Hz, 3H), 0.96 (t, *J* = 7.2 Hz, 2H).

**<sup>13</sup>C{<sup>1</sup>H} NMR** (101 MHz, Chloroform-*d*) δ 167.80, 165.84, 142.87, 140.32, 138.83, 137.00, 134.98, 132.04, 132.00, 130.94, 130.11, 128.85, 128.12, 127.95, 127.79, 127.74, 125.63, 124.21, 120.97, 97.03, 84.41, 72.52, 64.04, 62.33, 61.99, 49.63, 30.58, 20.95, 19.20, 13.88, 13.73.

**HR-MS** (ESI) calcd for C<sub>31</sub>H<sub>33</sub>NNaO<sub>7</sub>S<sup>+</sup> ([M]<sup>+</sup>+Na<sup>+</sup>) = 585.1870; found 585.1870.

**IR** (neat) ν (cm<sup>-1</sup>): 3267, 2982, 2932, 1753, 1597, 1454, 1338, 1292, 1159, 1036, 816, 699, 608, 556.

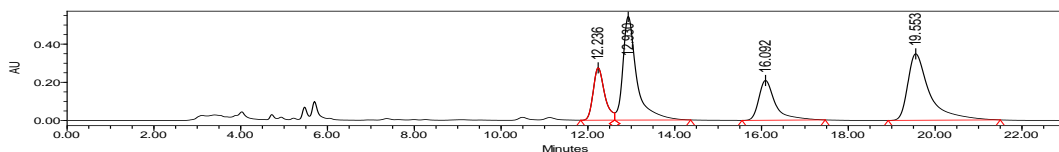

|   | Retention Time | % Area |
|---|----------------|--------|
| 1 | 12.236         | 14.49  |
| 2 | 12.930         | 34.75  |
| 3 | 16.092         | 15.91  |
| 4 | 19.553         | 34.85  |

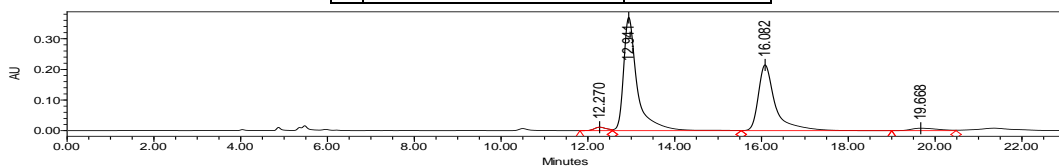

|   | Retention Time | % Area |
|---|----------------|--------|
| 1 | 12.270         | 1.53   |
| 2 | 12.941         | 55.83  |
| 3 | 16.082         | 40.27  |
| 4 | 19.668         | 2.37   |

**Diethyl (1*S*,5'*R*)-5-chloro-5'-phenyl-1'-(*o*-tolylsulfonyl)-3*H*-spiro[isobenzofuran-1,3'-pyrrolidine]-2',2'-dicarboxylate (3u)**

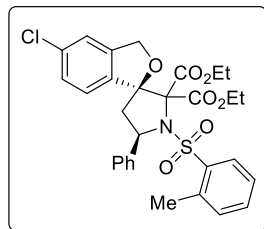

0.1 mmol scale reaction, 36 h, 47.8 mg, 82% yield, white foam. Melting point: 133 – 135 °C. 56: 44 dr., 86% ee for the major isomer and 82% ee for the minor isomer.  $[\alpha]_D^{26} = +28.1.1$  ( $c = 0.87$  in  $\text{CH}_2\text{Cl}_2$ ,  $\lambda = 405$  nm). **HPLC** (Daicel chiralcel ADH, hexane/*i*-PrOH = 85/15, flow rate 1.0 mL/min,  $\lambda = 254$  nm)  $t_r$  (major -major) = 24.45 min,  $t_r$  (major-minor) = 15.52 min,  $t_r$  (minor-major) = 19.55 min,  $t_r$  (minor-minor) = 8.89 min.

**$^1\text{H}$  NMR** (400 MHz, Chloroform-*d*)  $\delta$  7.98 (dd,  $J = 8.0, 1.2$  Hz, 1H), 7.34 – 7.28 (m, 3H), 7.24 – 7.15 (m, 3H), 7.14 – 7.08 (m, 3H), 7.07 – 7.01 (m, 2H), 6.95 (d,  $J = 7.6$  Hz, 1H), 5.56 (t,  $J = 7.6$  Hz, 1H), 5.11 (d,  $J = 12.4$  Hz, 1H), 5.01 (d,  $J = 12.4$  Hz, 1H), 4.45 – 4.20 (m, 3H), 4.15 – 4.06 (m, 1H), 3.83 (dt,  $J = 10.8, 7.2$  Hz, 1H), 2.99 (dd,  $J = 13.2, 8.0$  Hz, 1H), 2.78 (dd,  $J = 13.2, 8.0$  Hz, 1H), 2.19 (s, 3H), 1.30 (t,  $J = 7.2$  Hz, 3H), 1.10 (t,  $J = 7.2$  Hz, 3H).

**$^{13}\text{C}\{^1\text{H}\}$  NMR** (101 MHz, Chloroform-*d*)  $\delta$  167.80, 165.83, 142.87, 138.84, 138.24, 137.01, 134.98, 132.04, 132.00, 130.11, 128.13, 127.96, 127.79, 127.74, 125.63, 124.21, 120.97, 97.03, 84.41, 72.53, 64.04, 62.33, 61.99, 49.63, 20.94, 13.89.

**HR-MS** (ESI) calcd for  $\text{C}_{30}\text{H}_{30}^{35}\text{ClINNaO}_7\text{S}^+$  ( $[\text{M}]+\text{Na}^+$ ) = 606.1324, found 606.1326.

**HR-MS** (ESI) calcd for  $\text{C}_{30}\text{H}_{30}^{37}\text{ClINNaO}_7\text{S}^+$  ( $[\text{M}]+\text{Na}^+$ ) = 608.1294, found 608.1292.

**IR** (neat)  $\nu$  ( $\text{cm}^{-1}$ ): 2983, 2933, 1750, 1601, 1465, 1337, 1227, 1158, 1038, 906, 731, 699, 611, 585.

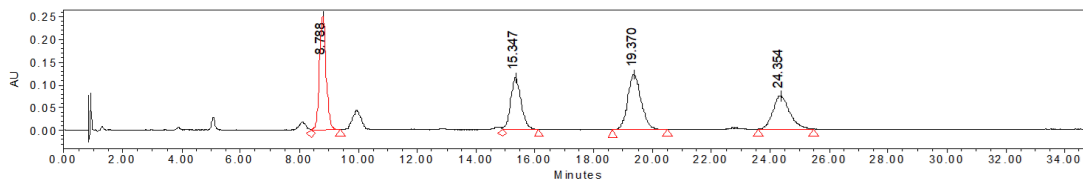

|   | Retention Time | % Area |
|---|----------------|--------|
| 1 | 8.788          | 28.98  |
| 2 | 15.347         | 21.07  |
| 3 | 19.370         | 28.45  |
| 4 | 24.354         | 21.50  |

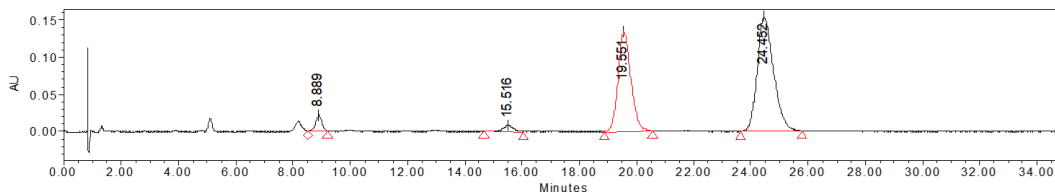

|   | Retention Time | % Area |
|---|----------------|--------|
| 1 | 8.889          | 3.09   |
| 2 | 15.516         | 1.98   |
| 3 | 19.551         | 38.49  |
| 4 | 24.452         | 56.44  |

(K) Copies of NMR spectra for the products

Diethyl (1*S*,5'*R*)-5'-phenyl-1'-(phenylsulfonyl)-3*H*-spiro[isobenzofuran-1,3'-pyrrolidine]-2',2'-dicarboxylate (3a)

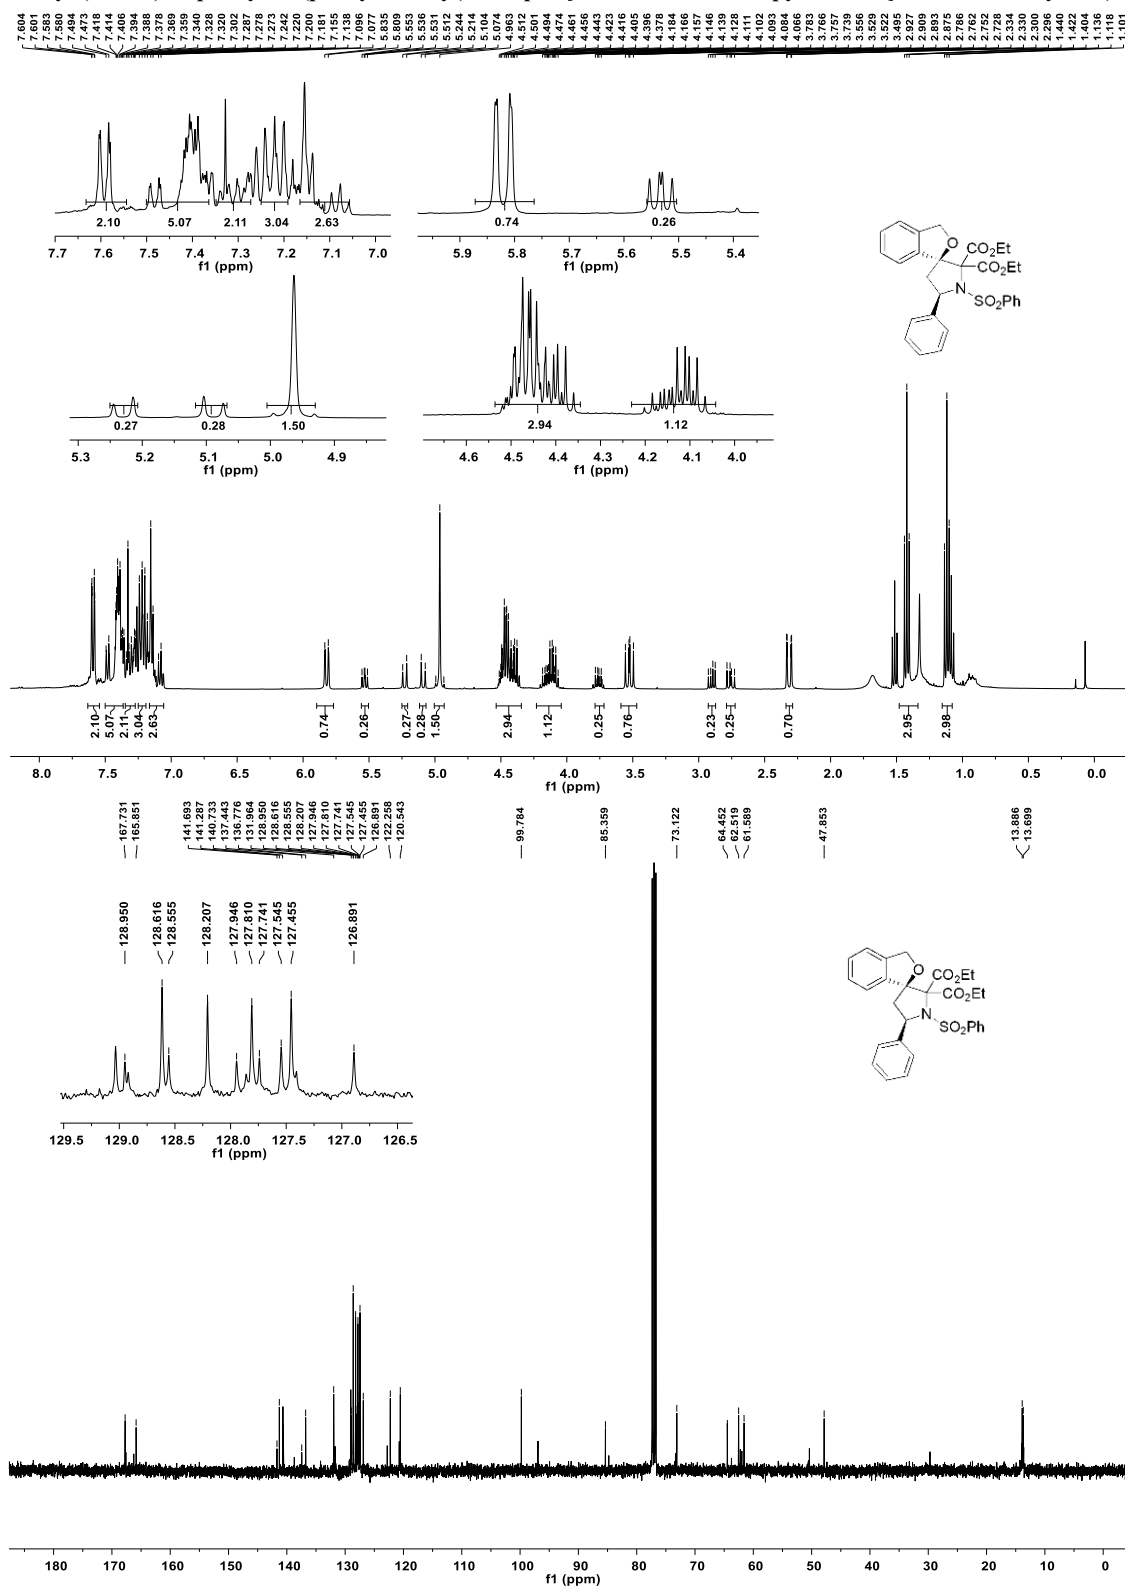

Diethyl (1*S*,5'*R*)-1'-(phenylsulfonyl)-5'-(*p*-tolyl)-3*H*-spiro[isobenzofuran-1,3'-pyrrolidine]-2',2'-dicarboxylate(3b)

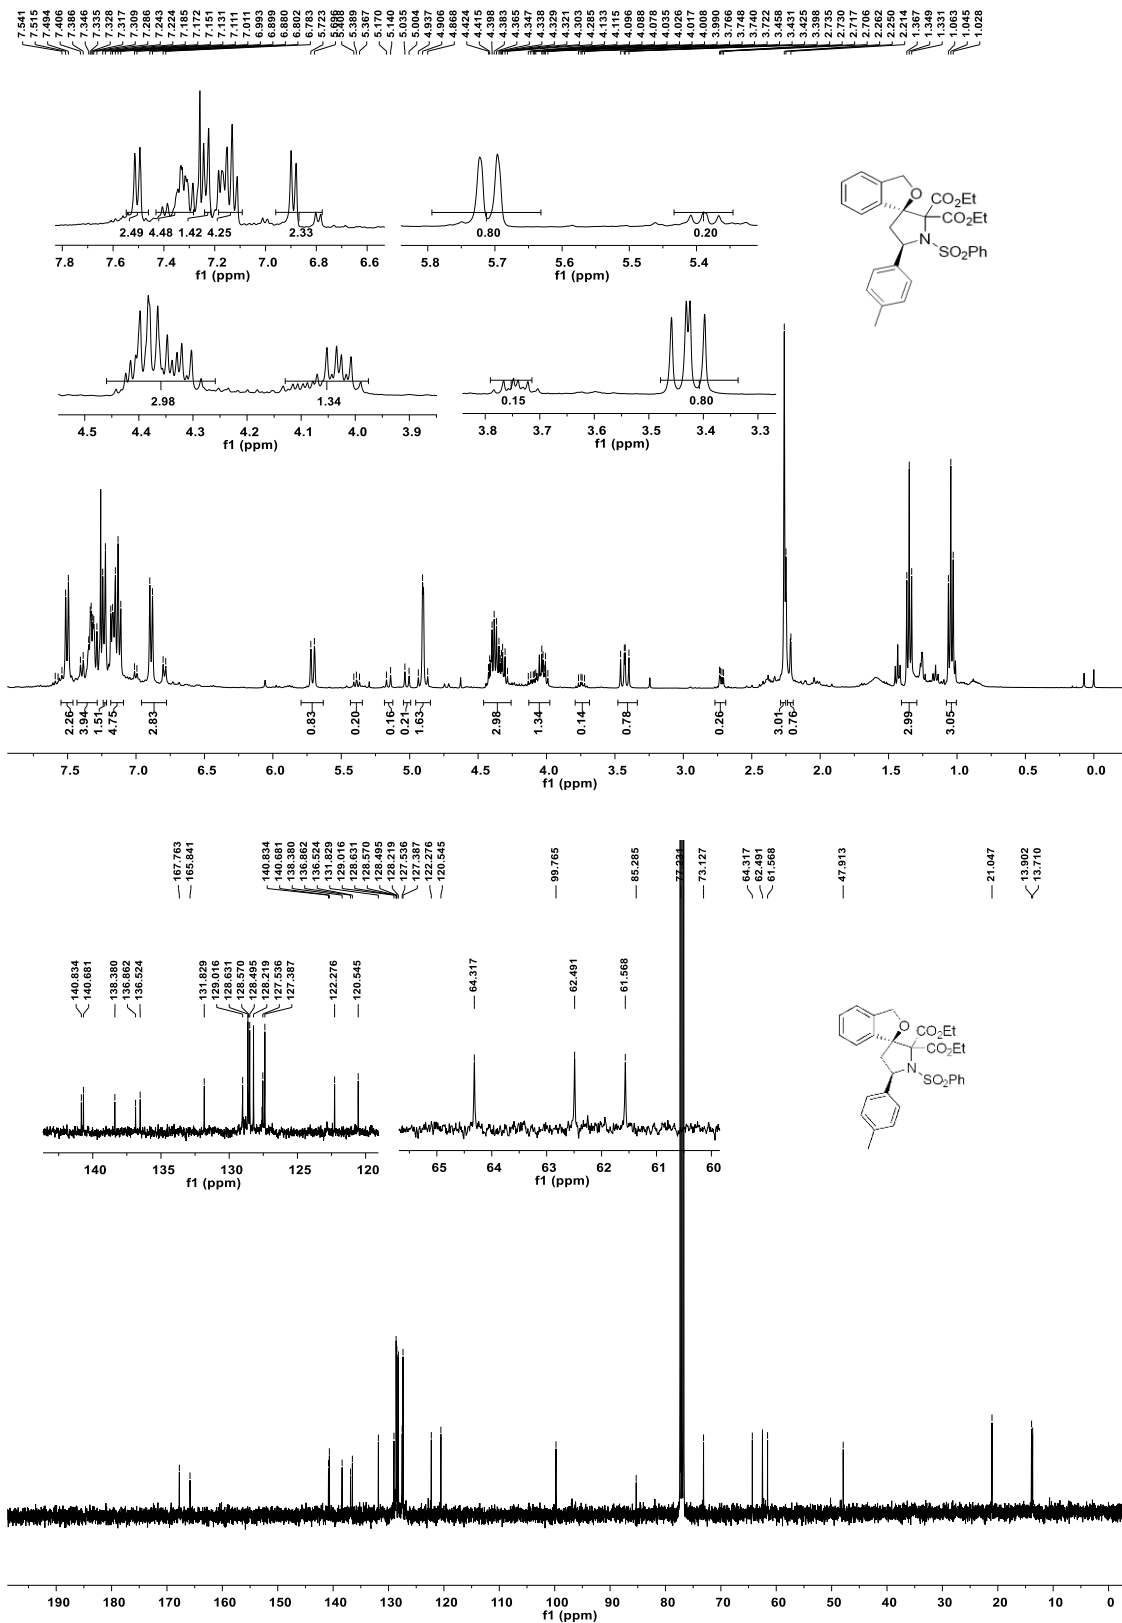

**Diethyl (1*S*,5'*R*)-5'-(4-fluorophenyl)-1'-(phenylsulfonyl)-3*H*-spiro[isobenzofuran-1,3'-pyrrolidine]-2',2'-dicarboxylate (3c)**

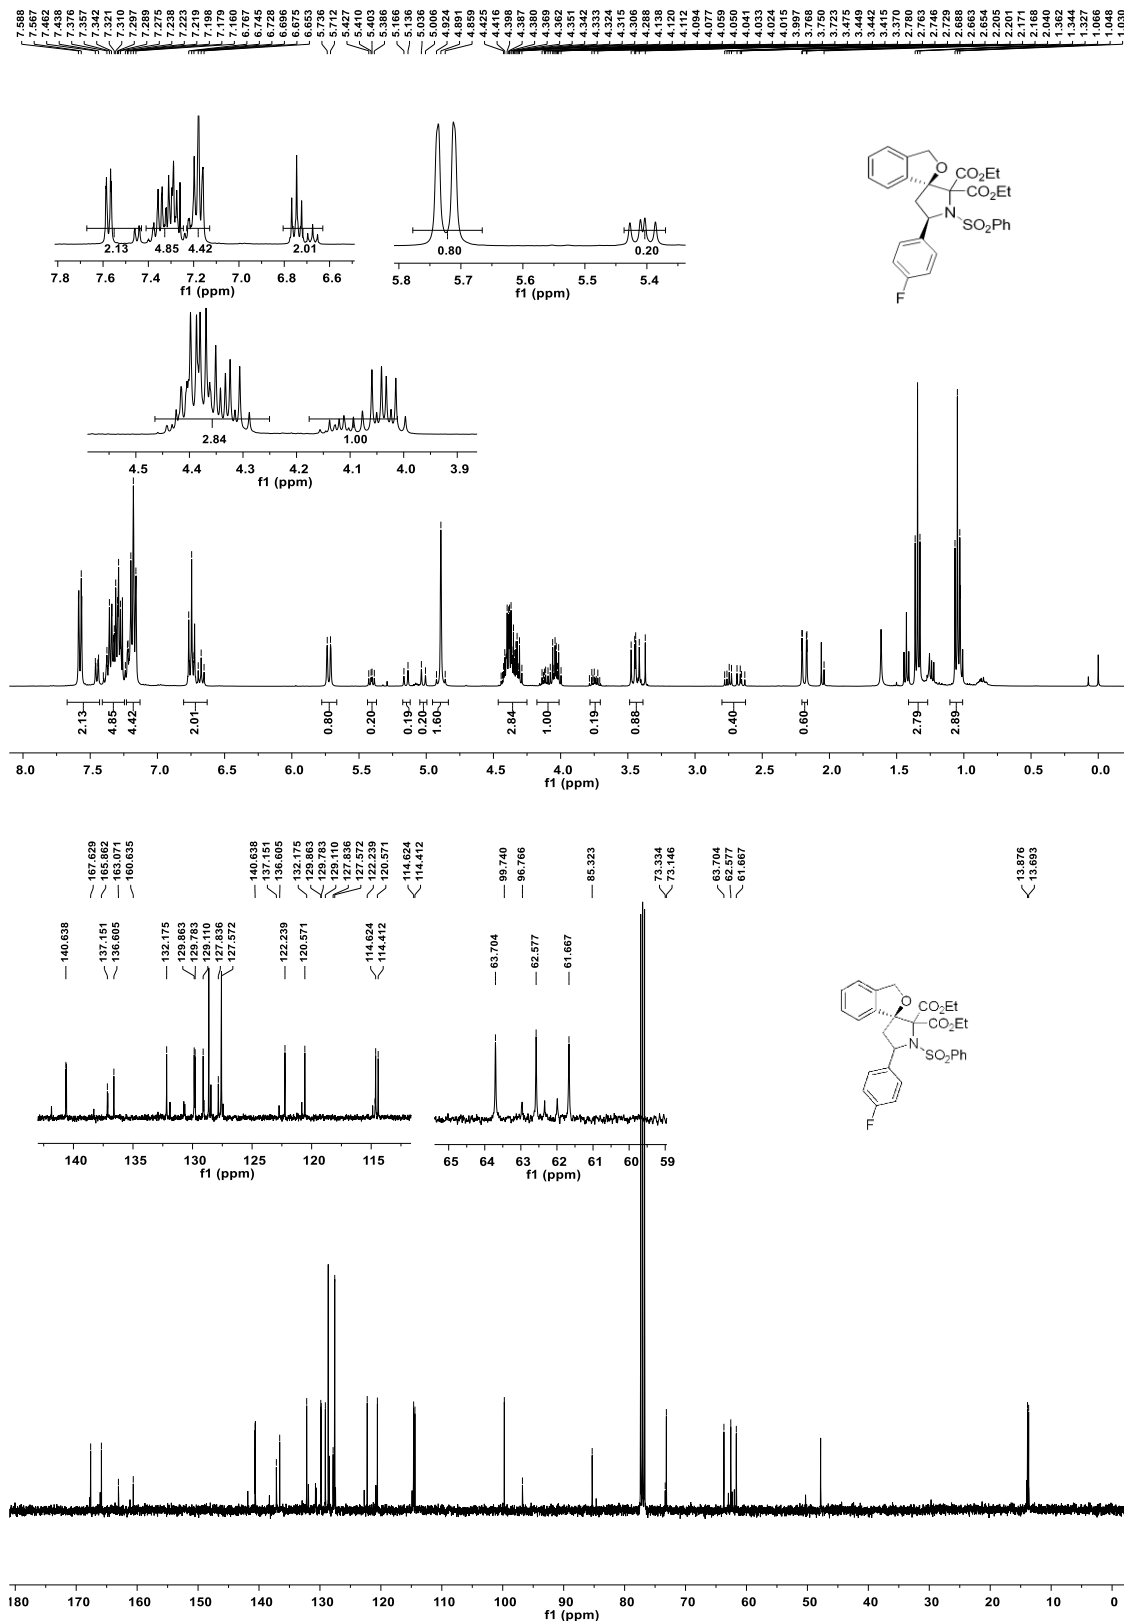

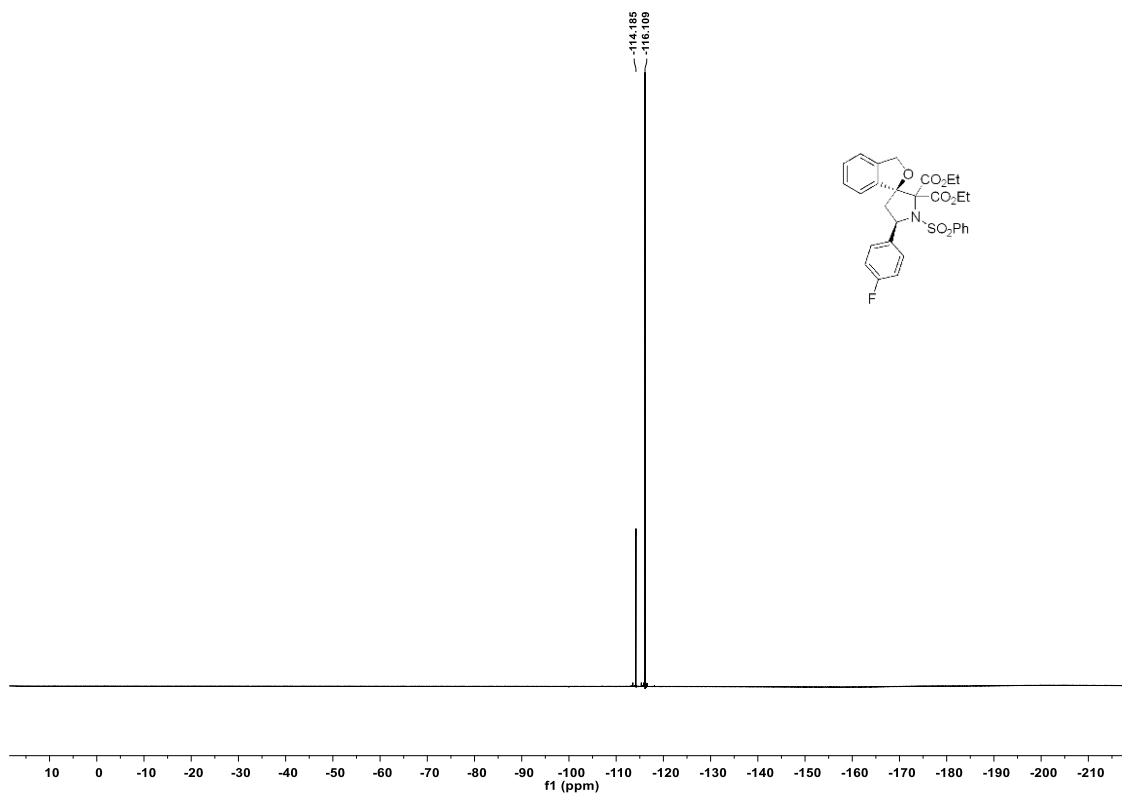

**Diethyl (1*S*,5'*R*)-5'-(4-chlorophenyl)-1'-(phenylsulfonyl)-3*H*-spiro[isobenzofuran-1,3'-pyrrolidine]-2',2'-dicarboxylate (3d)**

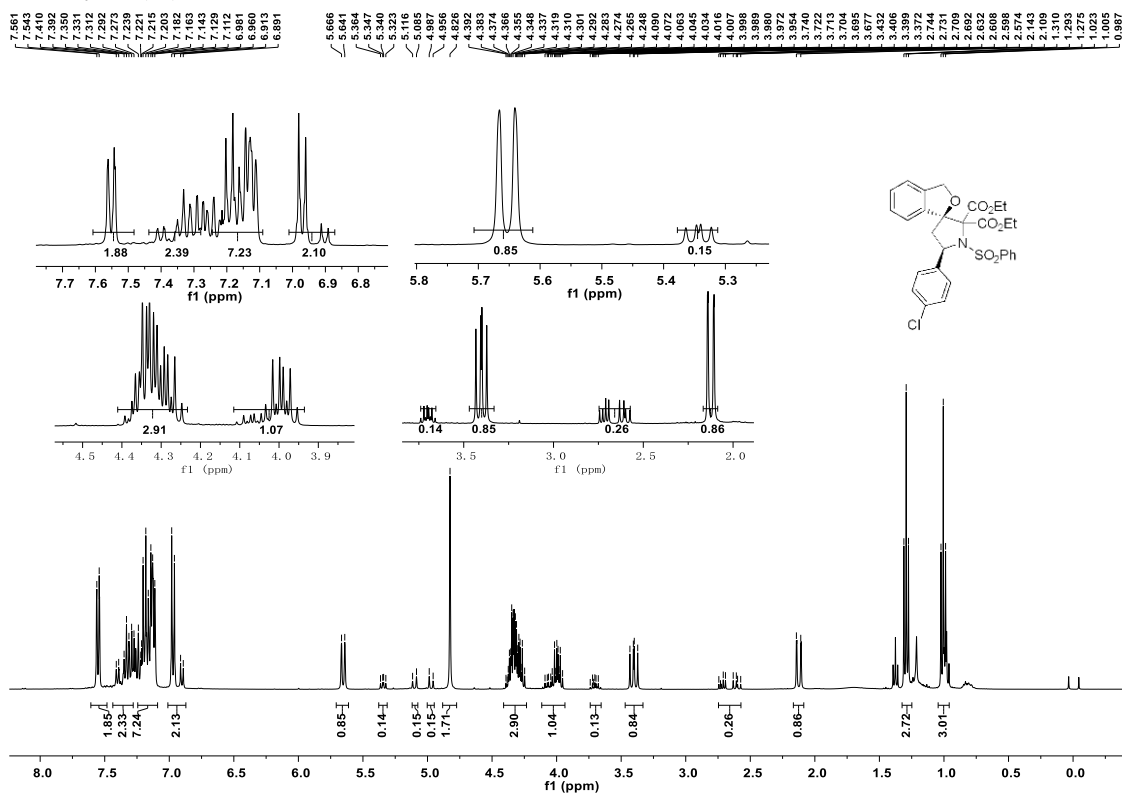

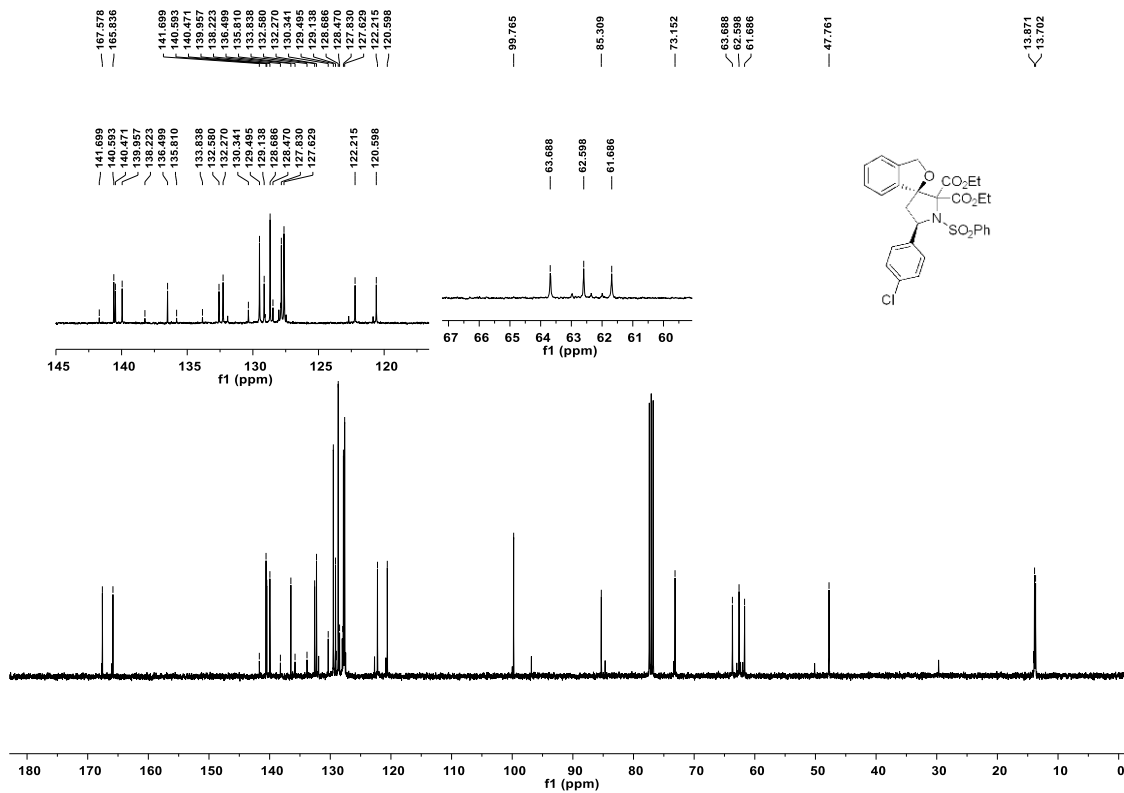

**Diethyl (1*S*,5'*R*)-5'-(4-bromophenyl)-1'-(phenylsulfonyl)-3*H*-spiro[isobenzofuran-1,3'-pyrrolidine]-2',2'-dicarboxylate (3e)**

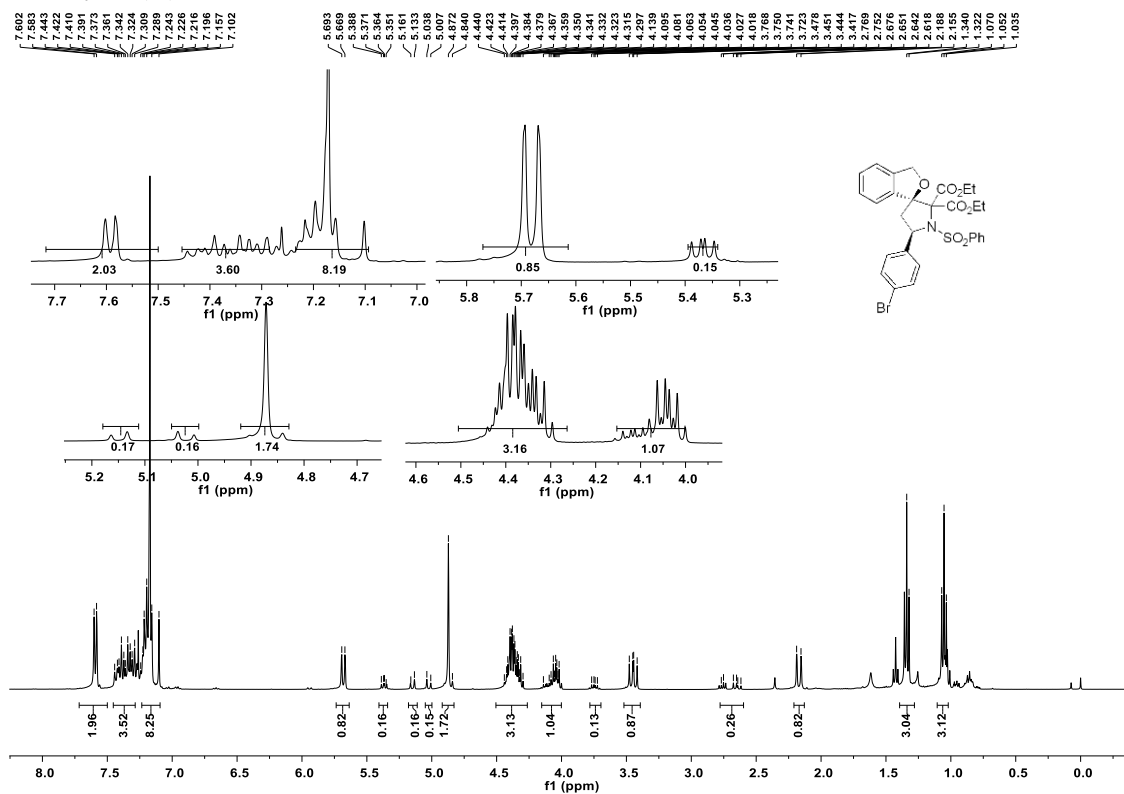

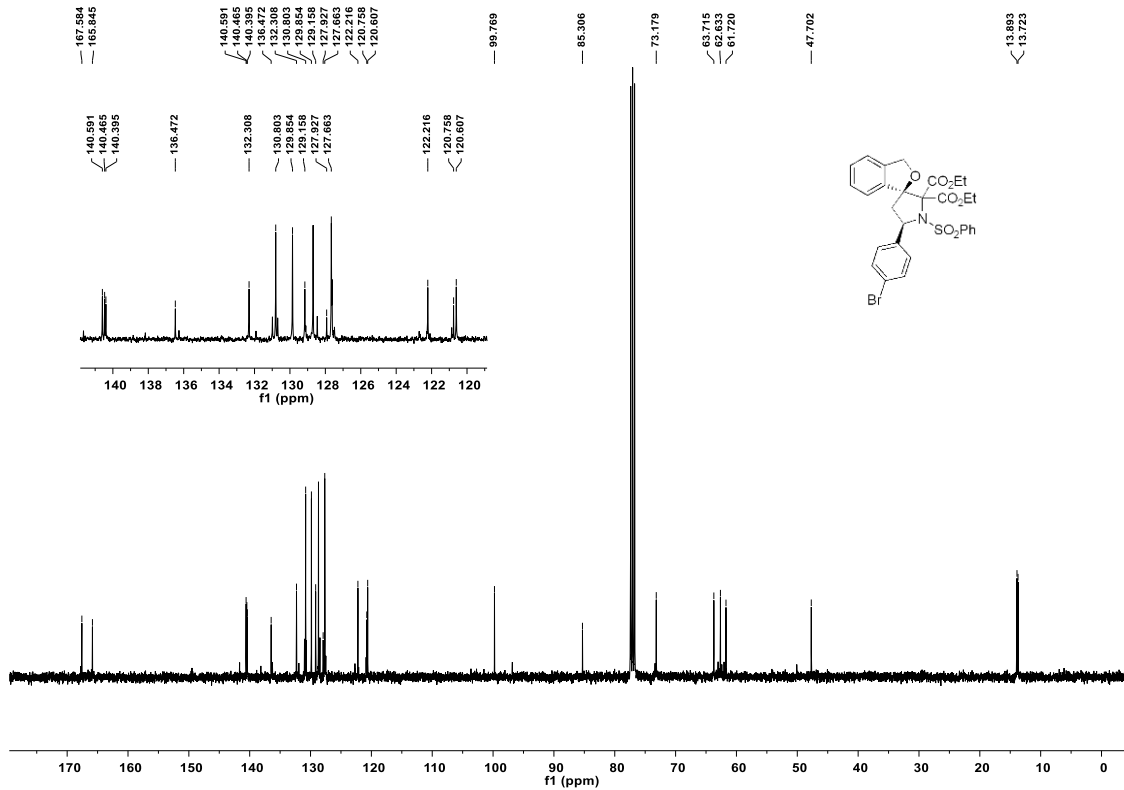

**Diethyl (1*S*,5'*R*)-5'-(4-nitrophenyl)-1'-(phenylsulfonyl)-3*H*-spiro[isobenzofuran-1,3'-pyrrolidine]-2',2'-dicarboxylate (3f)**

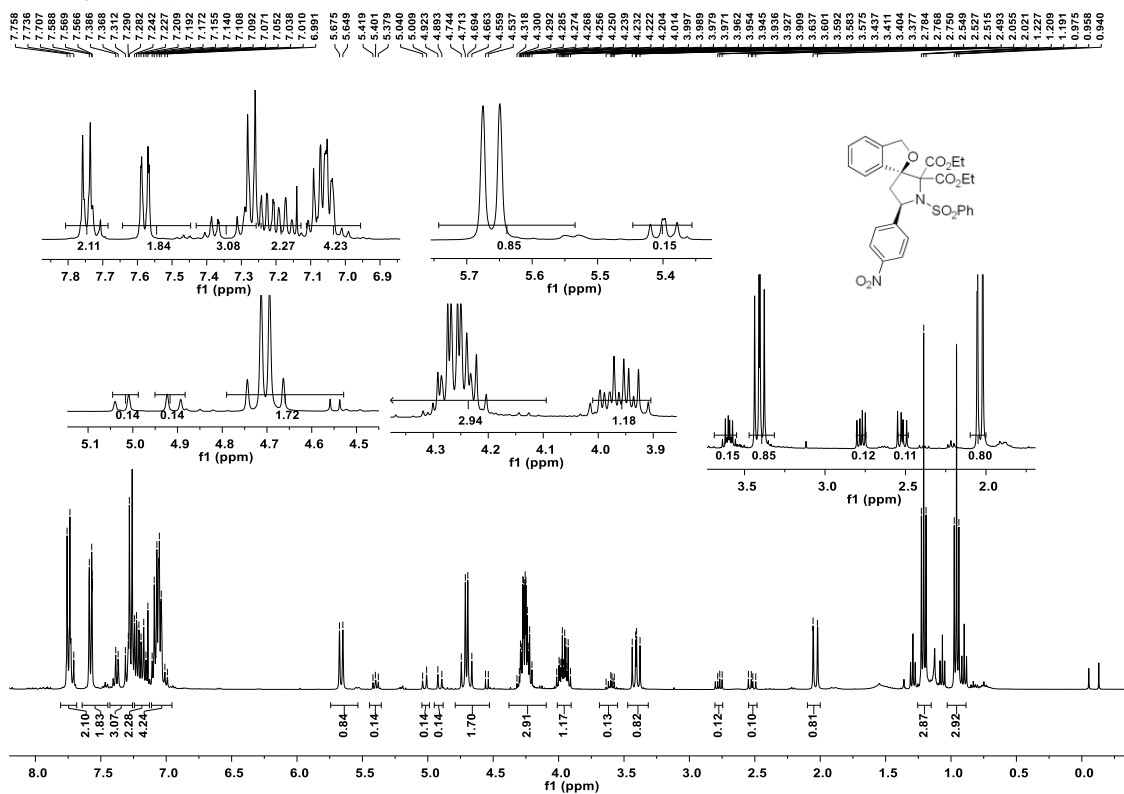



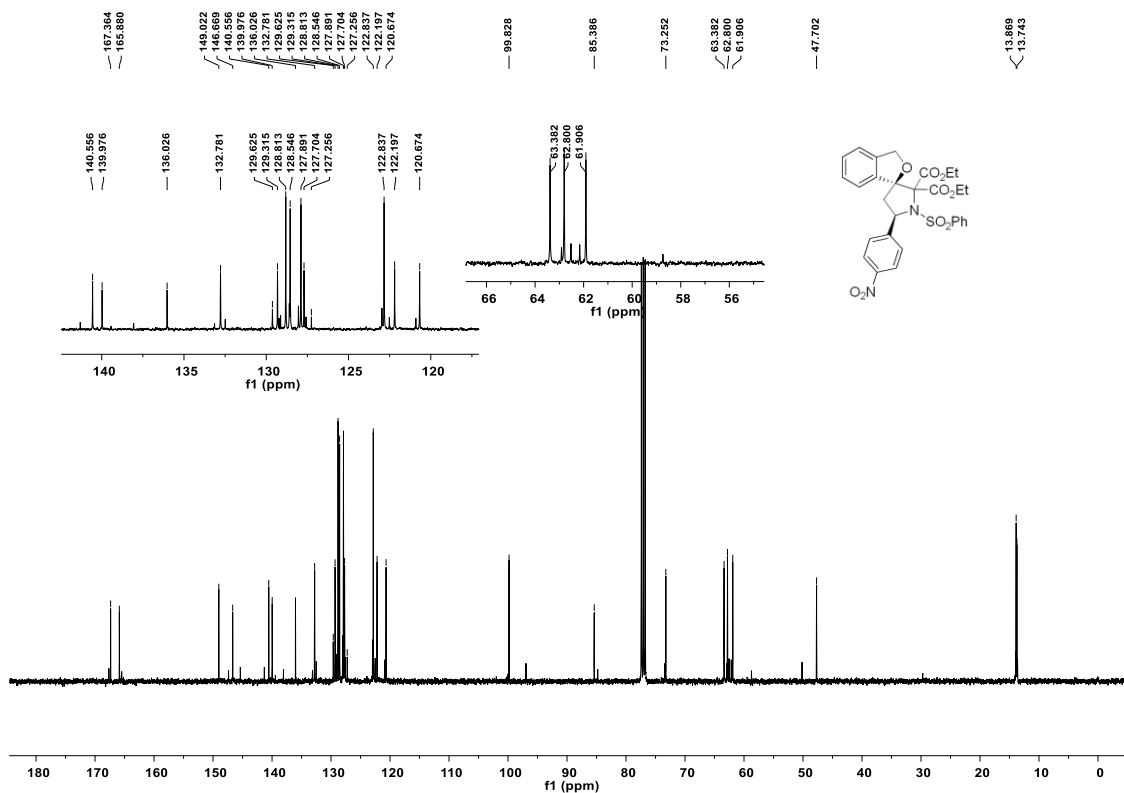

**Diethyl (1*S*,5'*R*)-1'-(phenylsulfonyl)-5'-(4-(trifluoromethyl)phenyl)-3*H*-spiro[isobenzofuran-1,3'-pyrrolidine]-2',2'-dicarboxylate (3g)**

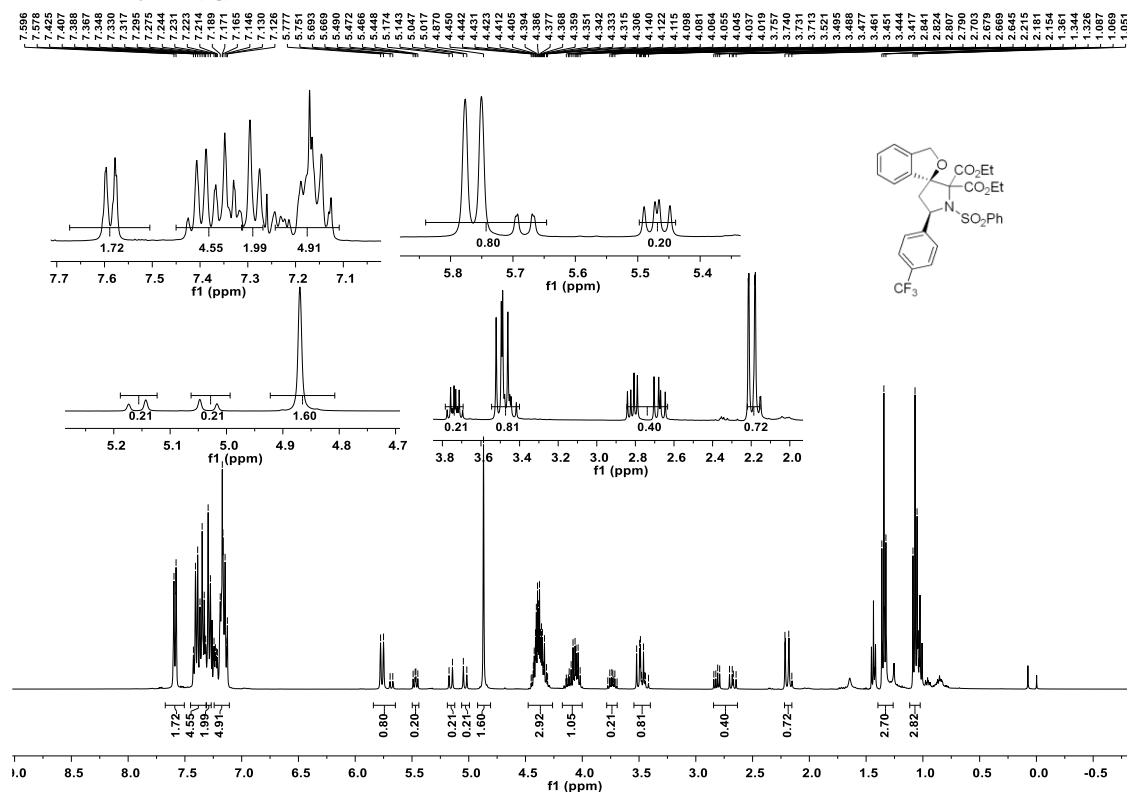

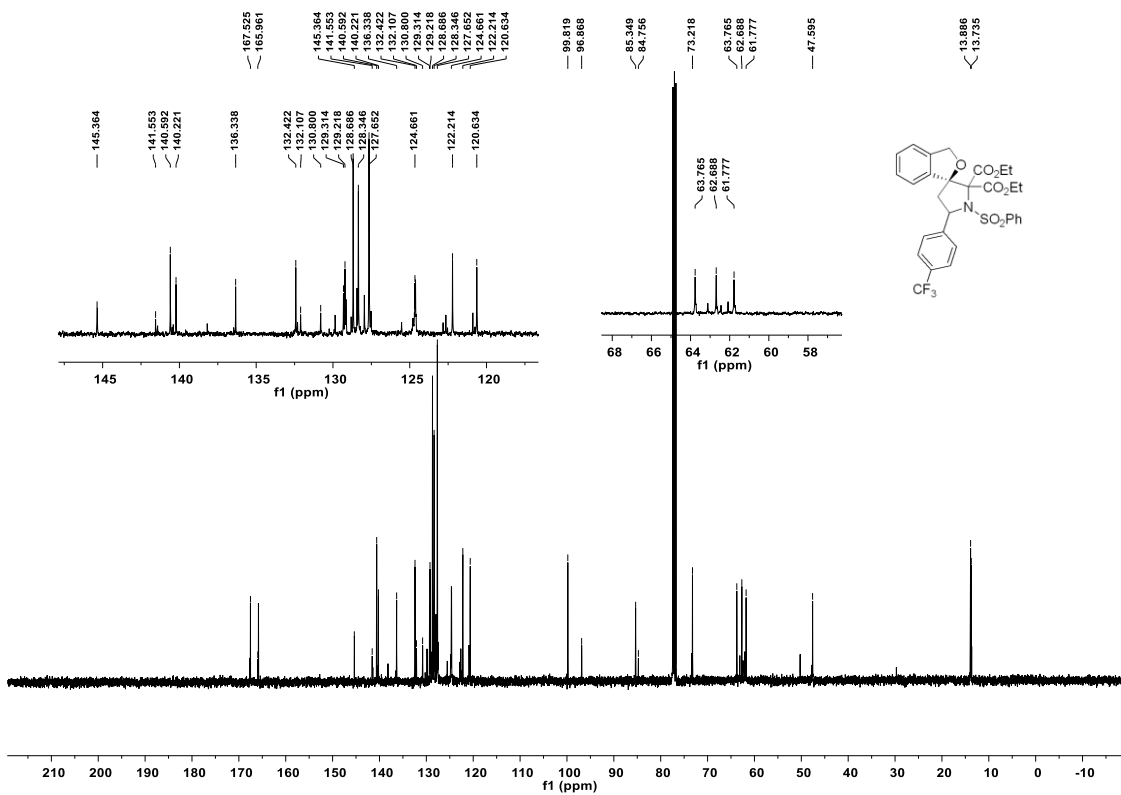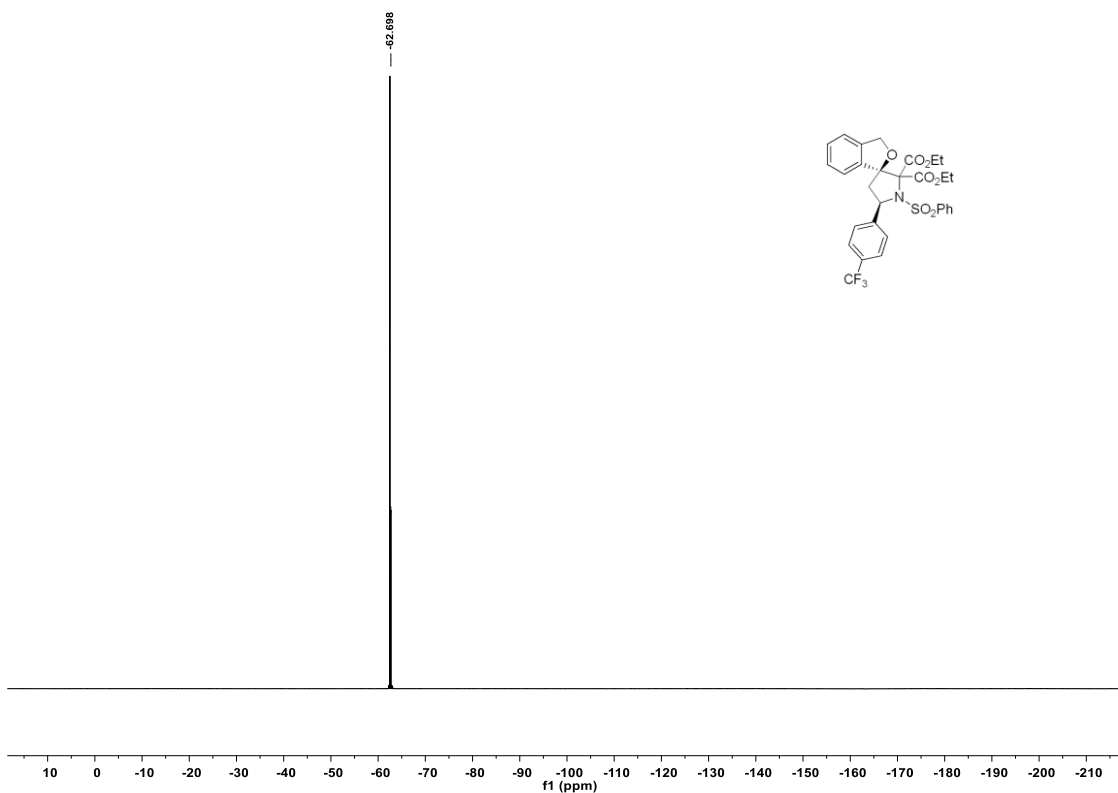

Diethyl (1*S*,5'*R*)-5'-([1,1'-biphenyl]-4-yl)-1'-(phenylsulfonyl)-3*H*-spiro[isobenzofuran-1,3'-pyrrolidine]-2',2'-dicarboxylate (**3h**)

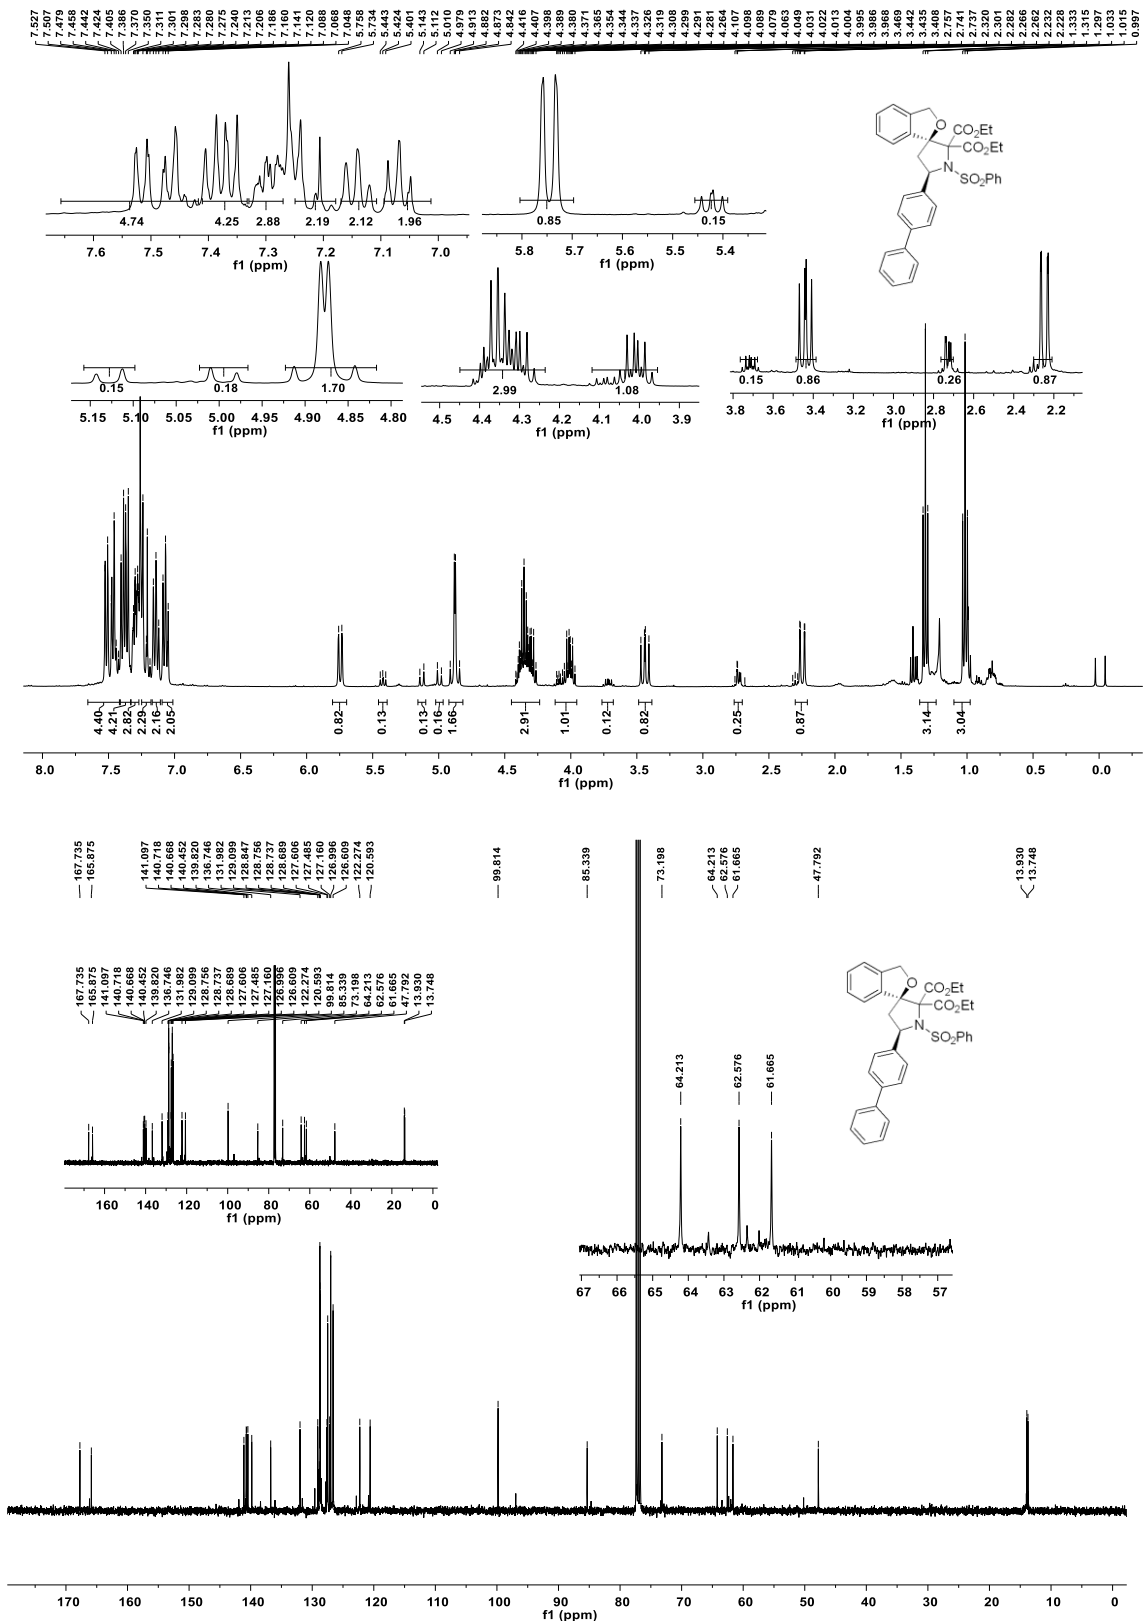

**Diethyl (1*S*,5'*R*)-5'-(naphthalen-1-yl)-1'-(phenylsulfonyl)-3*H*-spiro[isobenzofuran-1,3'-pyrrolidine]-2',2'-dicarboxylate (3i)**

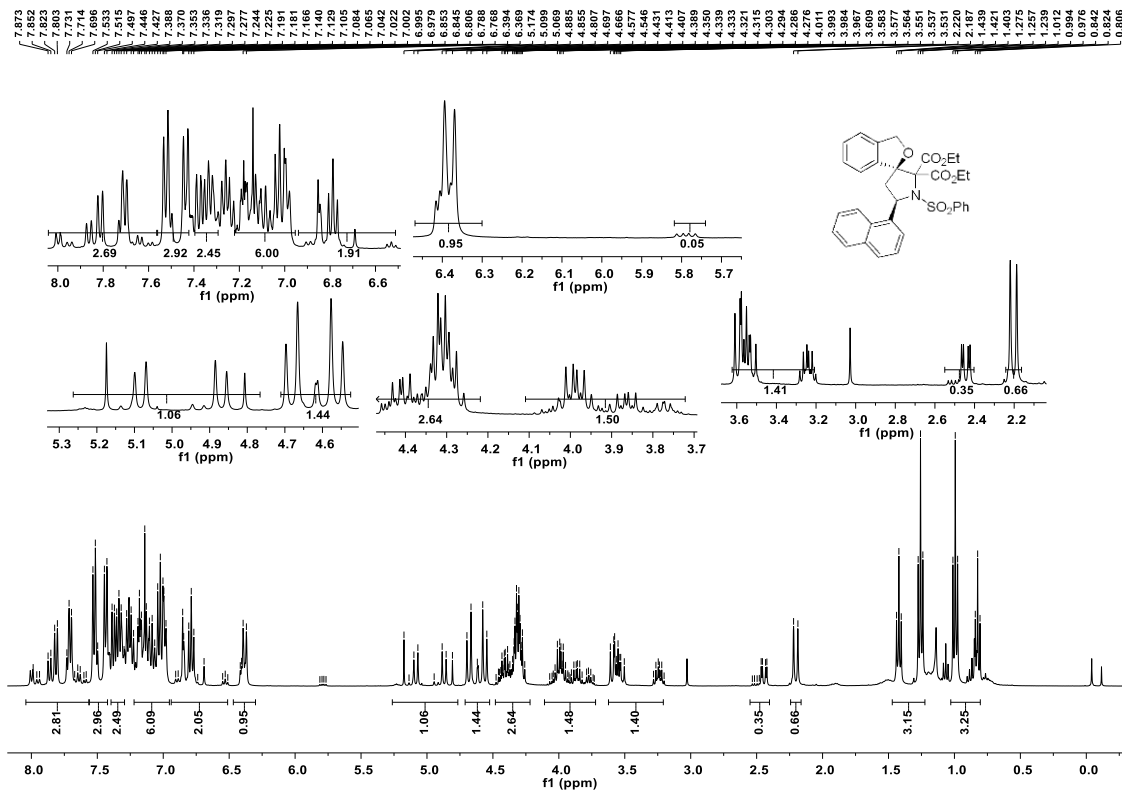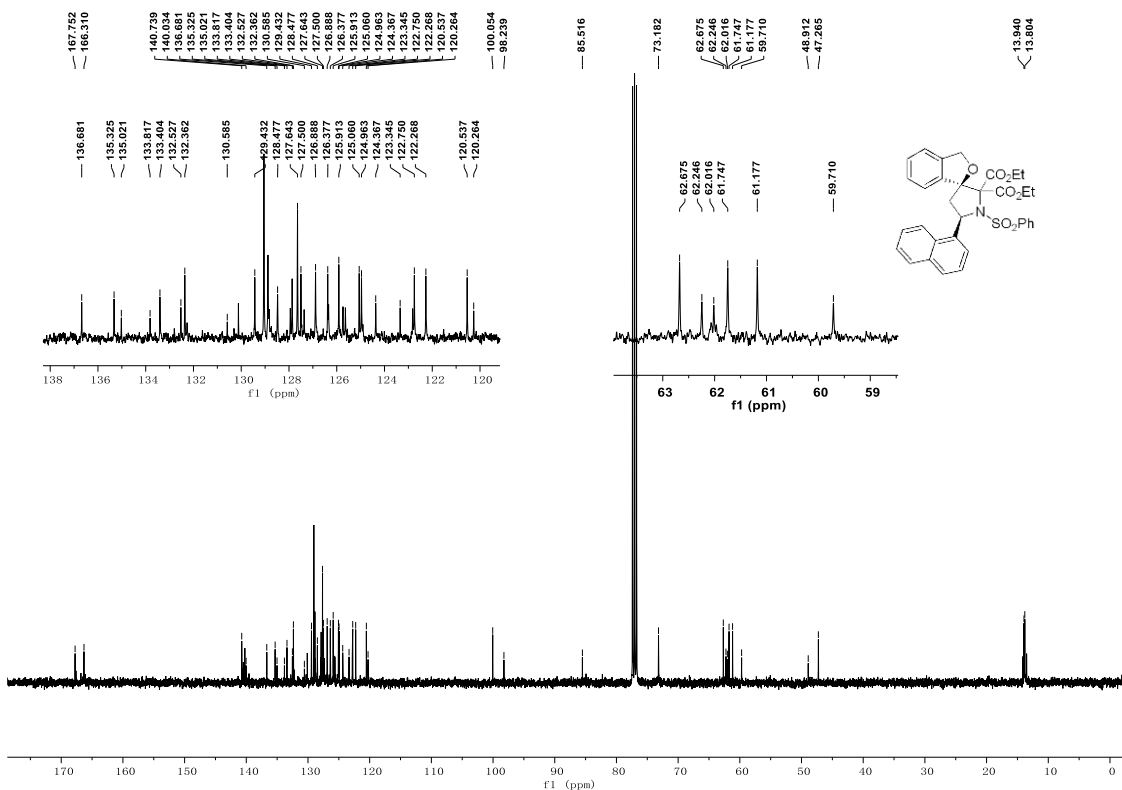

**Diethyl (1*S*,5'*R*)-5'-(3-chlorophenyl)-1'-(phenylsulfonyl)-3*H*-spiro[isobenzofuran-1,3'-pyrrolidine]-2',2'-dicarboxylate (3j)**

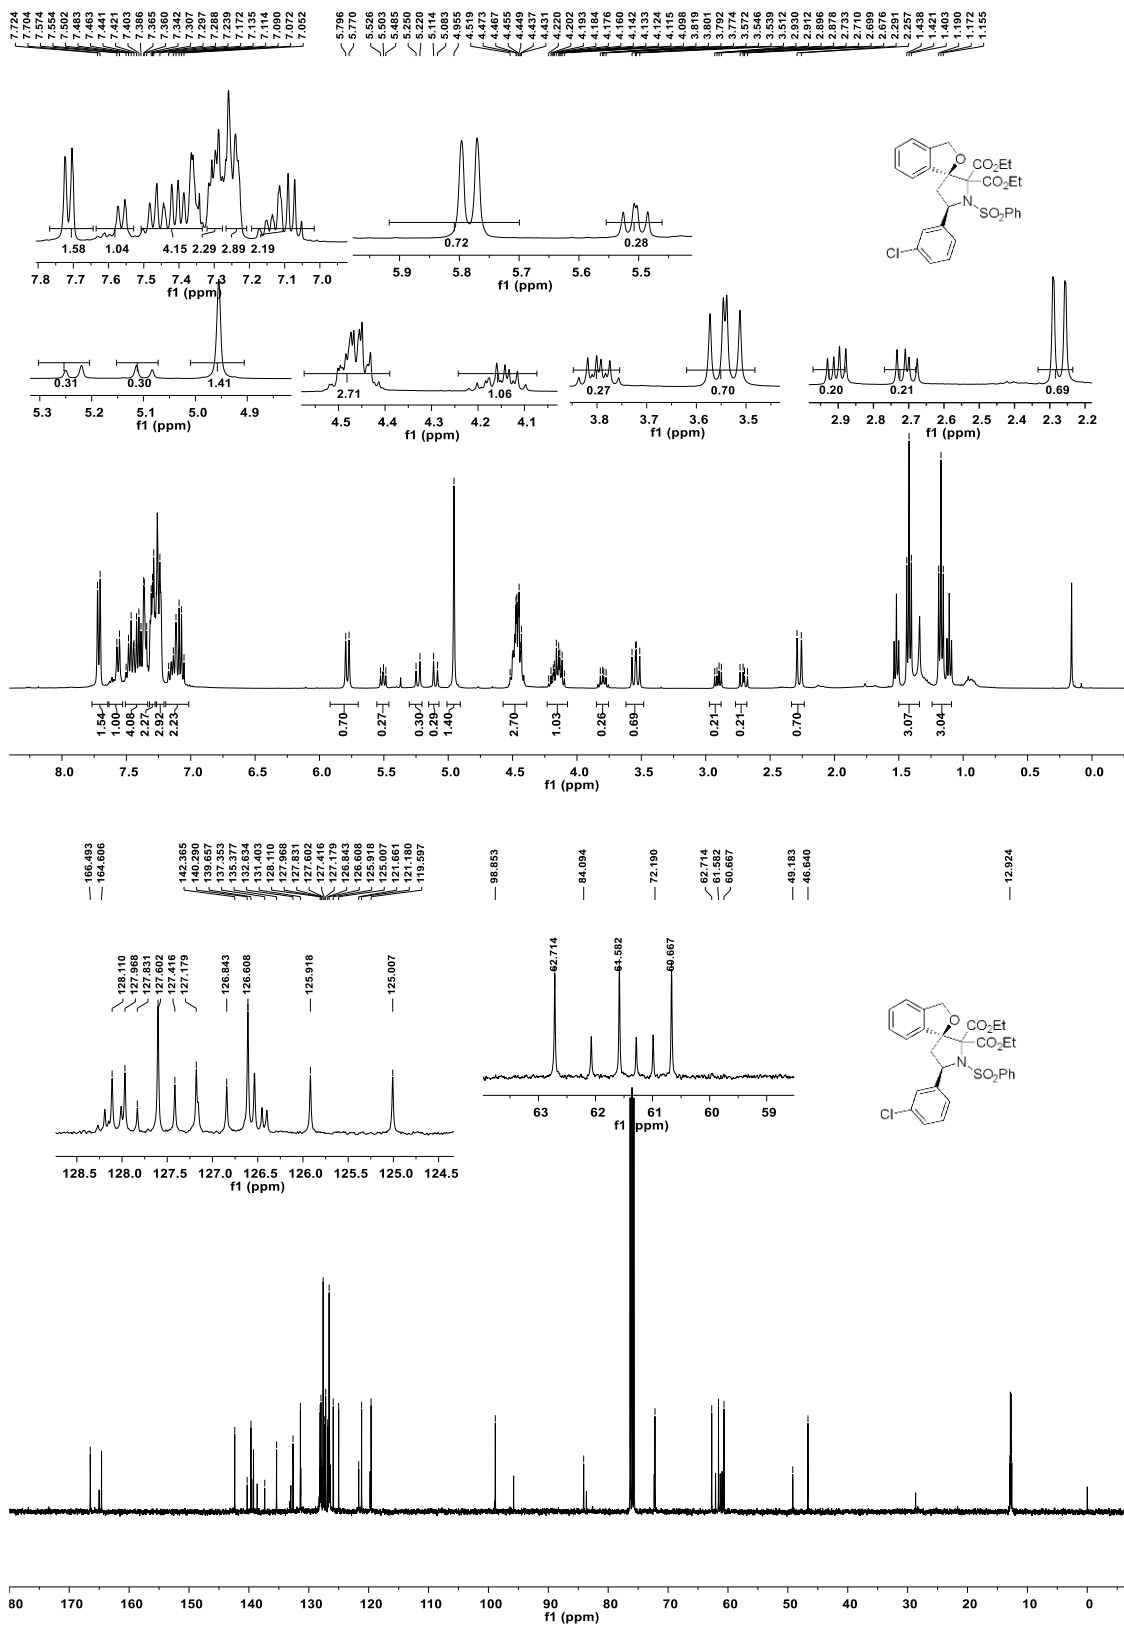

**Diethyl (1*S*,5'*R*)-5'-(3-bromophenyl)-1'-(phenylsulfonyl)-3*H*-spiro[isobenzofuran-1,3'-pyrrolidine]-2',2'-dicarboxylate (3k)**

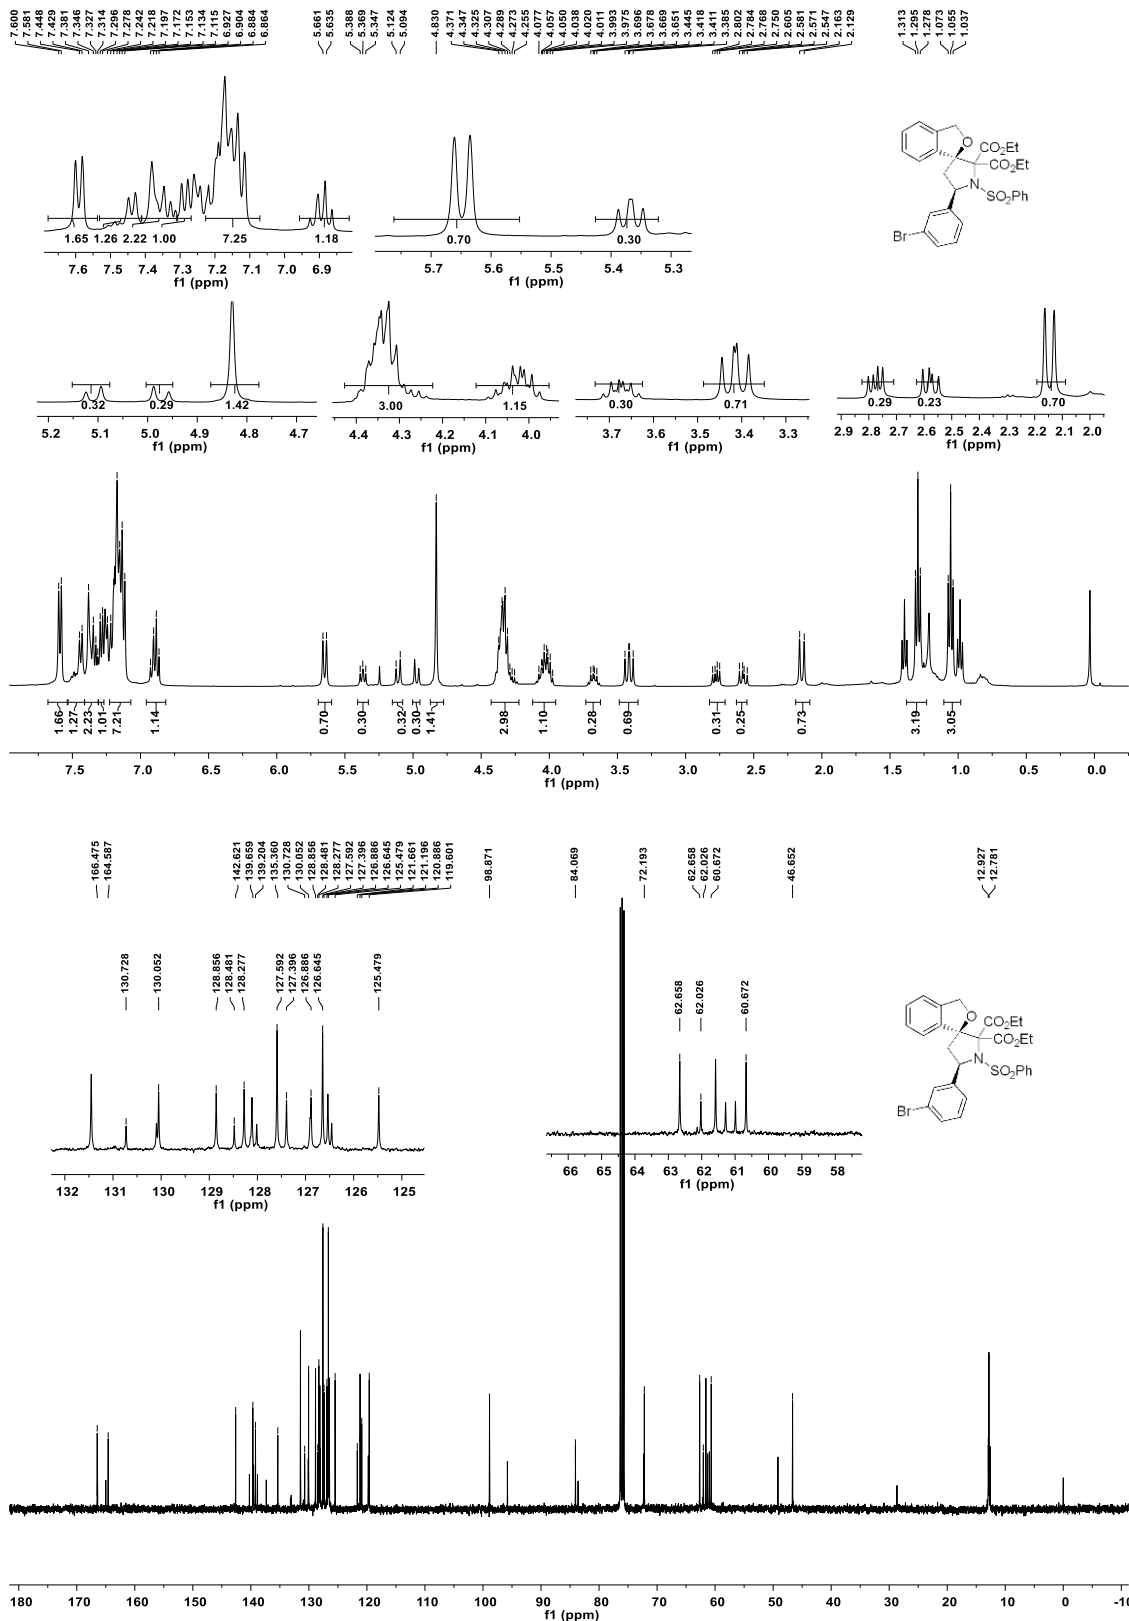

**Diethyl (1*S*,5'*R*)-5'-(2-fluorophenyl)-1'-(phenylsulfonyl)-3*H*-spiro[isobenzofuran-1,3'-pyrrolidine]-2',2'-dicarboxylate (3i)**

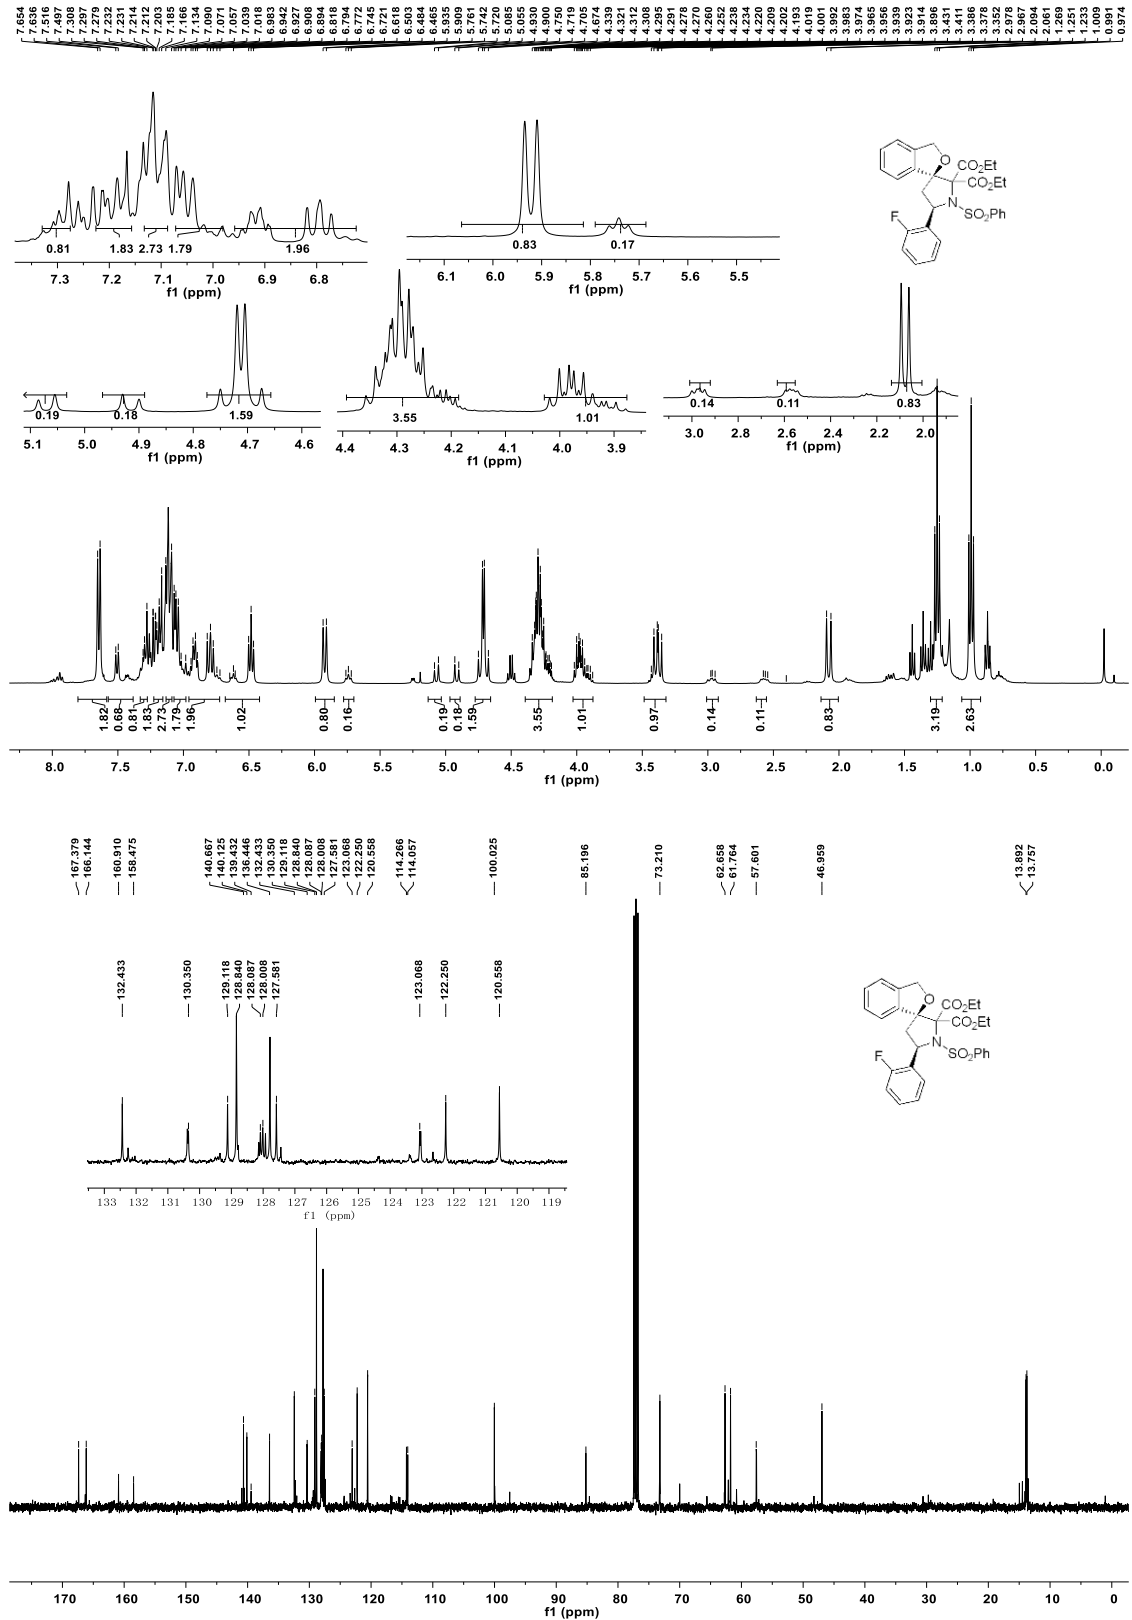

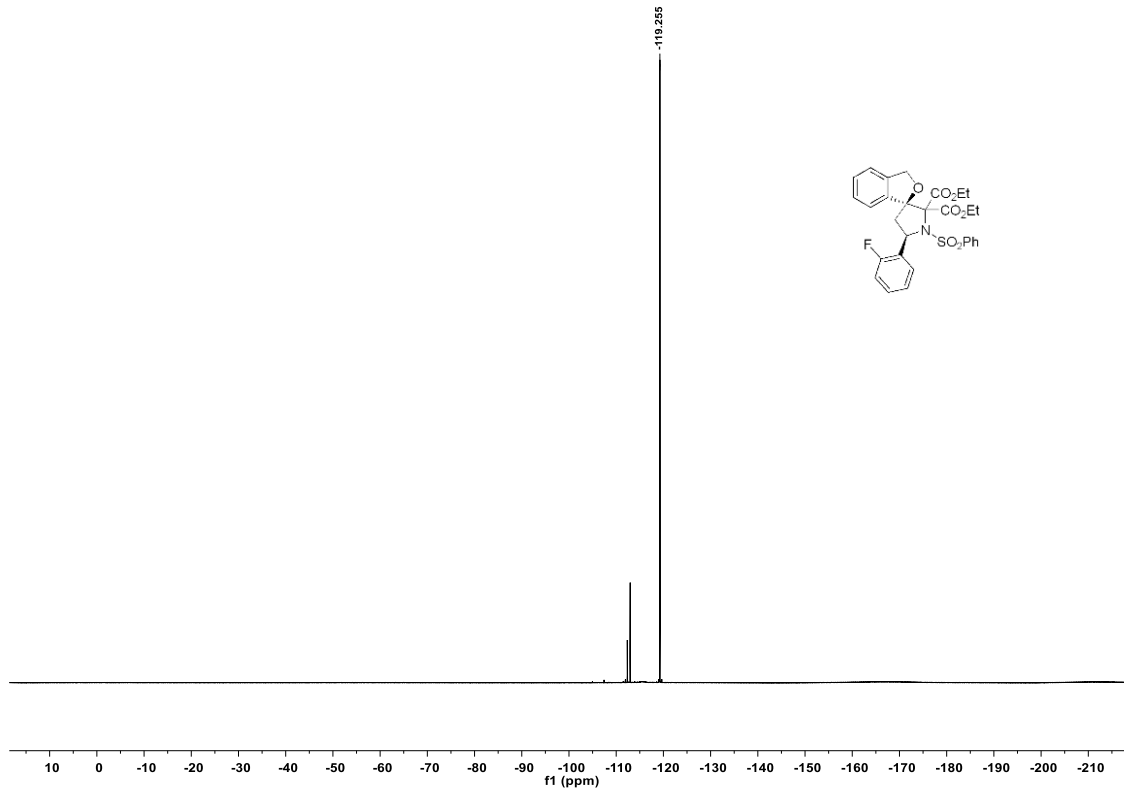

**Diethyl (1*S*,5'*R*)-5'-(2-chlorophenyl)-1'-(phenylsulfonyl)-3*H*-spiro[isobenzofuran-1,3'-pyrrolidine]-2',2'-dicarboxylate (3m)**

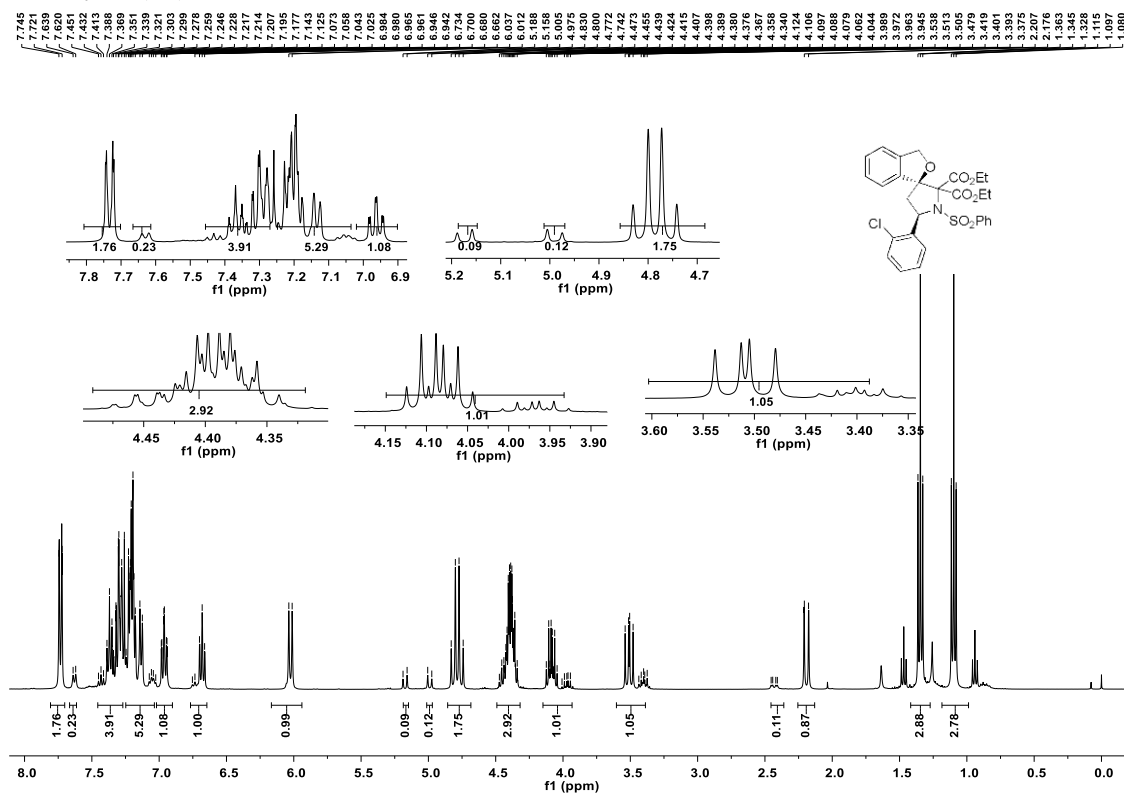



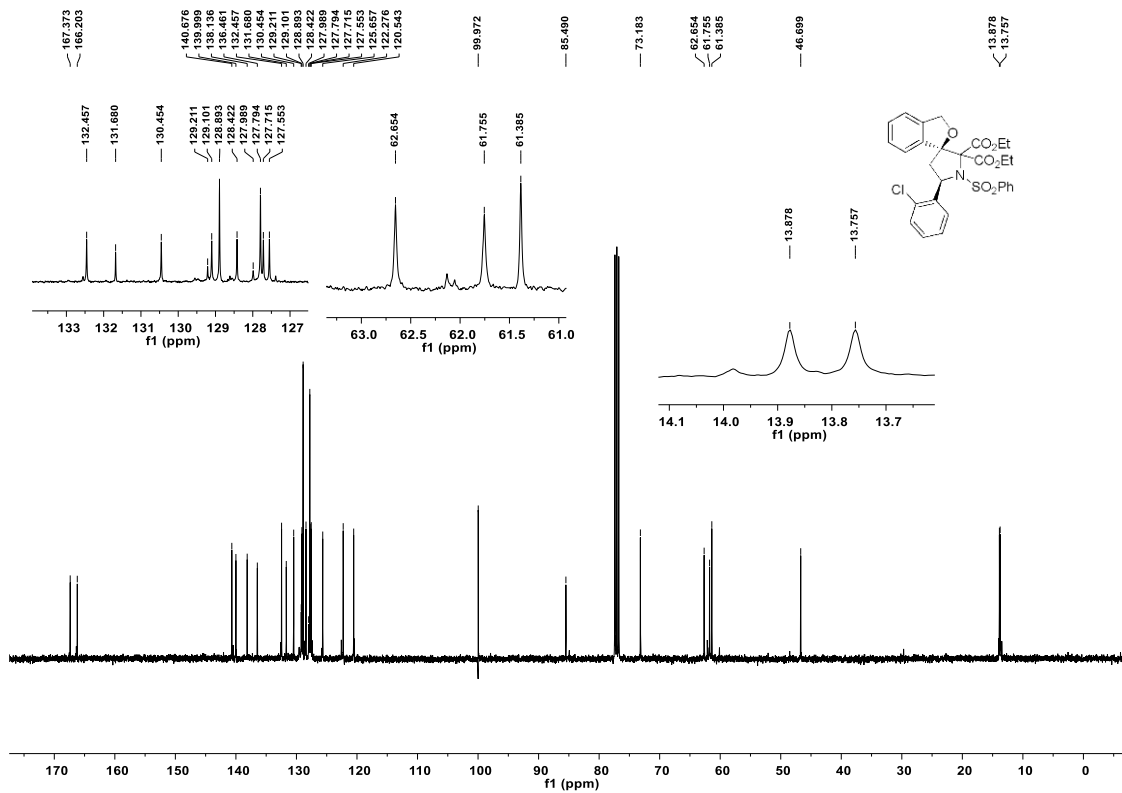

**Diethyl (1S,5'R)-5'-(2-bromophenyl)-1'-(phenylsulfonyl)-3H-spiro[isobenzofuran-1,3'-pyrrolidine]-2',2'-dicarboxylate (3n)**

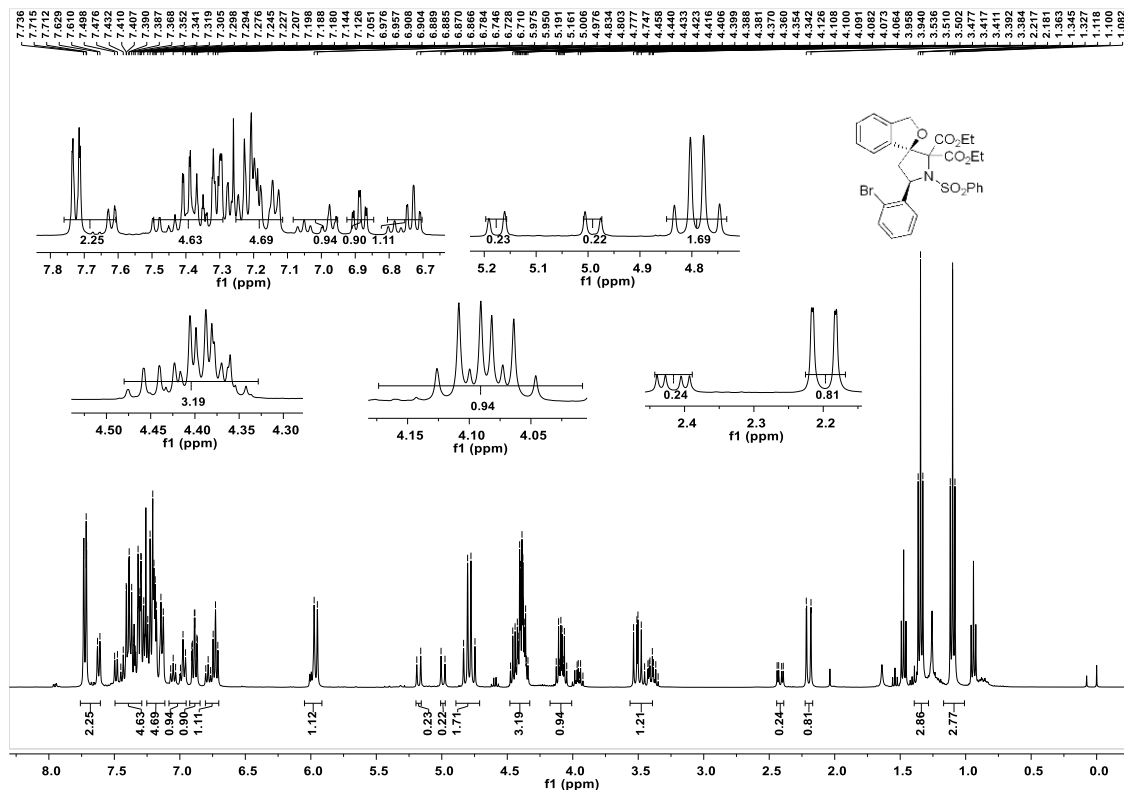

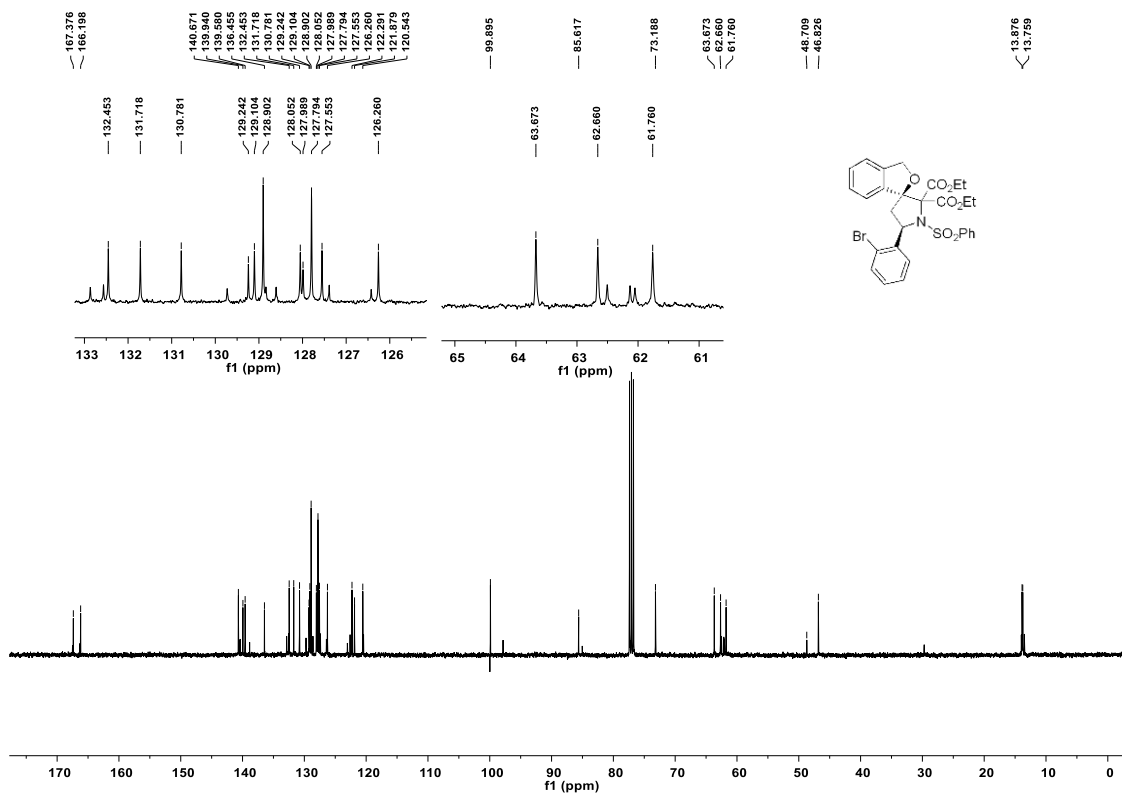

**Diethyl (1*S*,5'*R*)-1'-(phenylsulfonyl)-5'-(*o*-tolyl)-3*H*-spiro[isobenzofuran-1,3'-pyrrolidine]-2',2'-dicarboxylate (3o)**

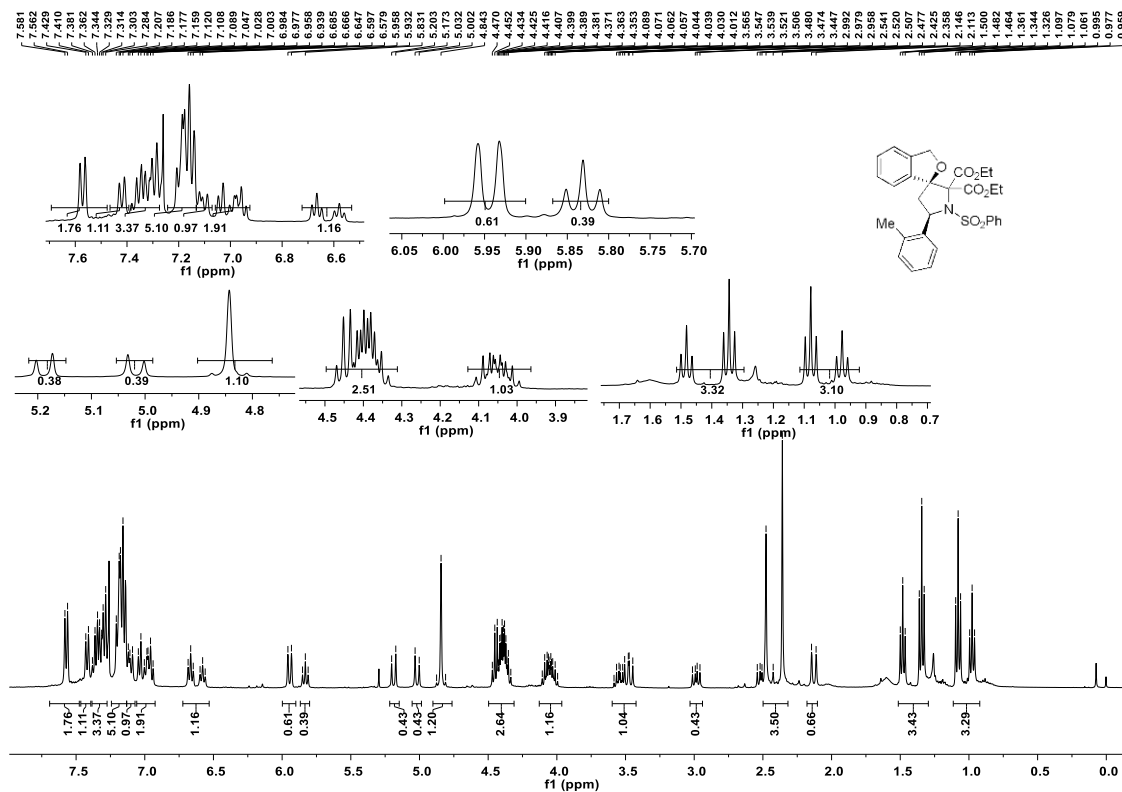

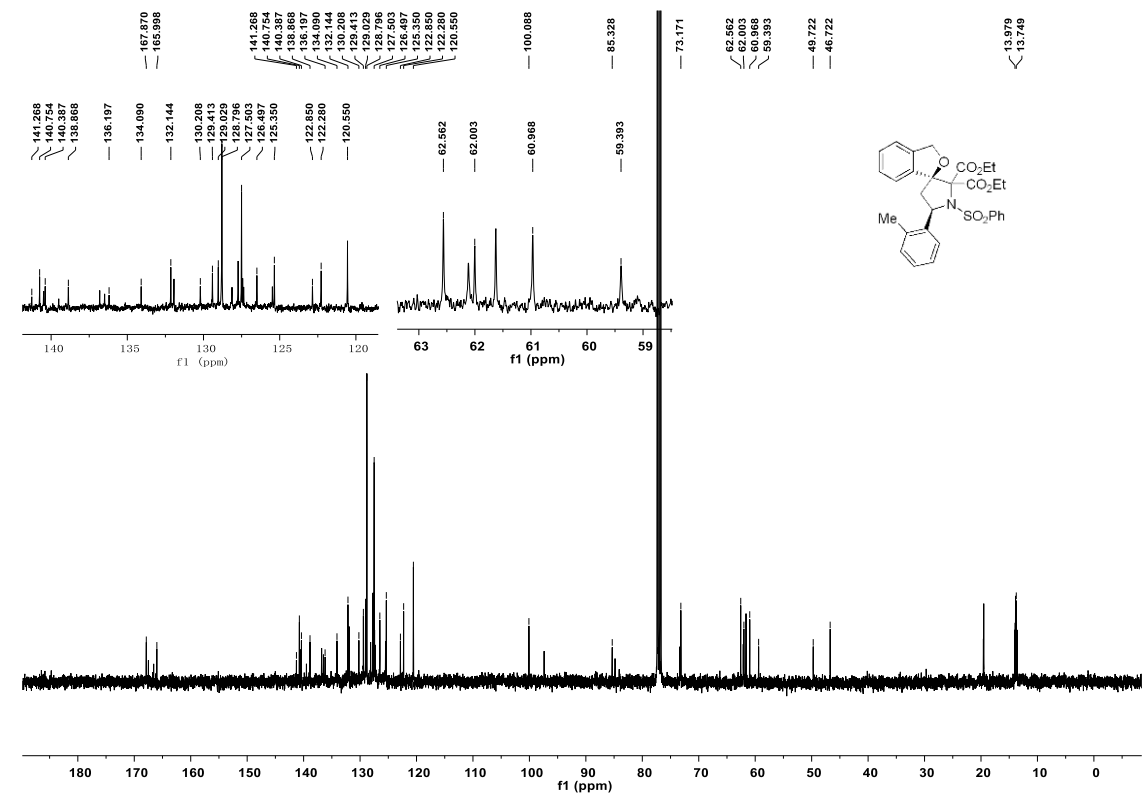

Diethyl (1*S*,5'*R*)-5'-phenyl-1'-(*o*-tolylsulfonyl)-3*H*-spiro[isobenzofuran-1,3'-pyrrolidine]-2',2'-dicarboxylate (3*p*)

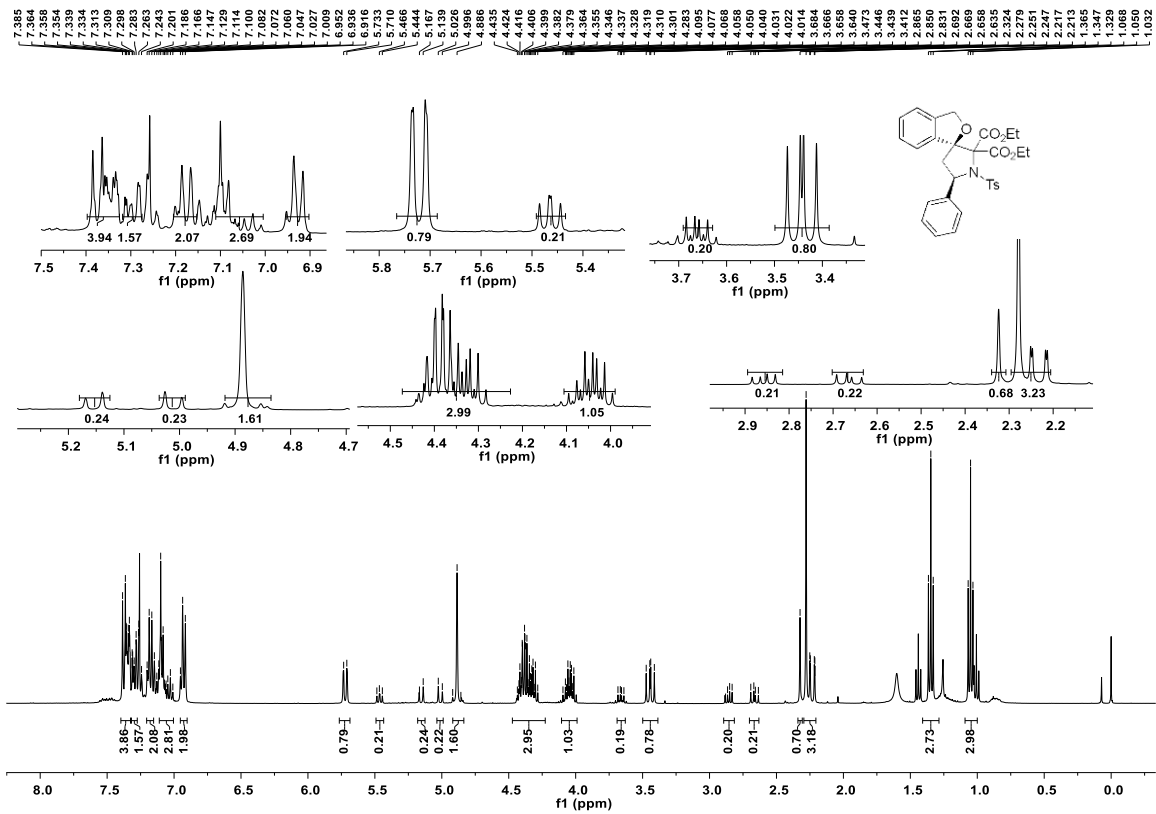

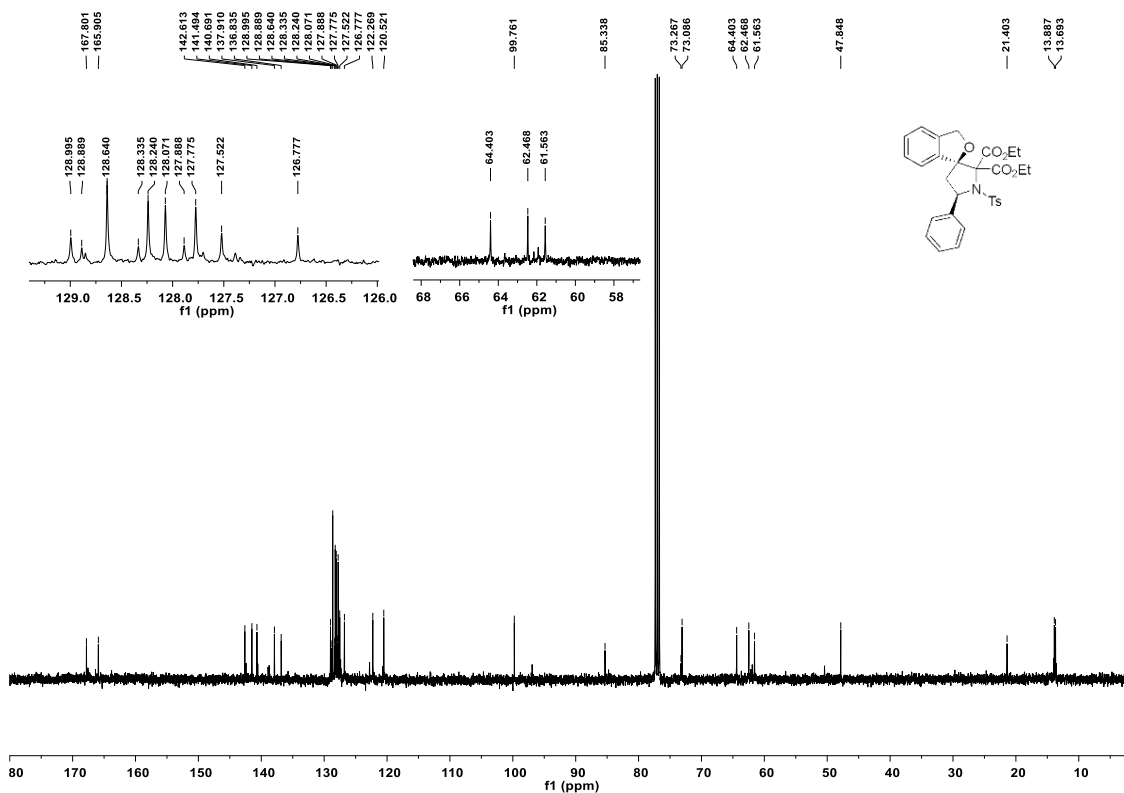

Diethyl (1*S*,5'*R*)-5'-phenyl-1'-(*o*-tolylsulfonyl)-3*H*-spiro[isobenzofuran-1,3'-pyrrolidine]-2',2'-dicarboxylate (3q)

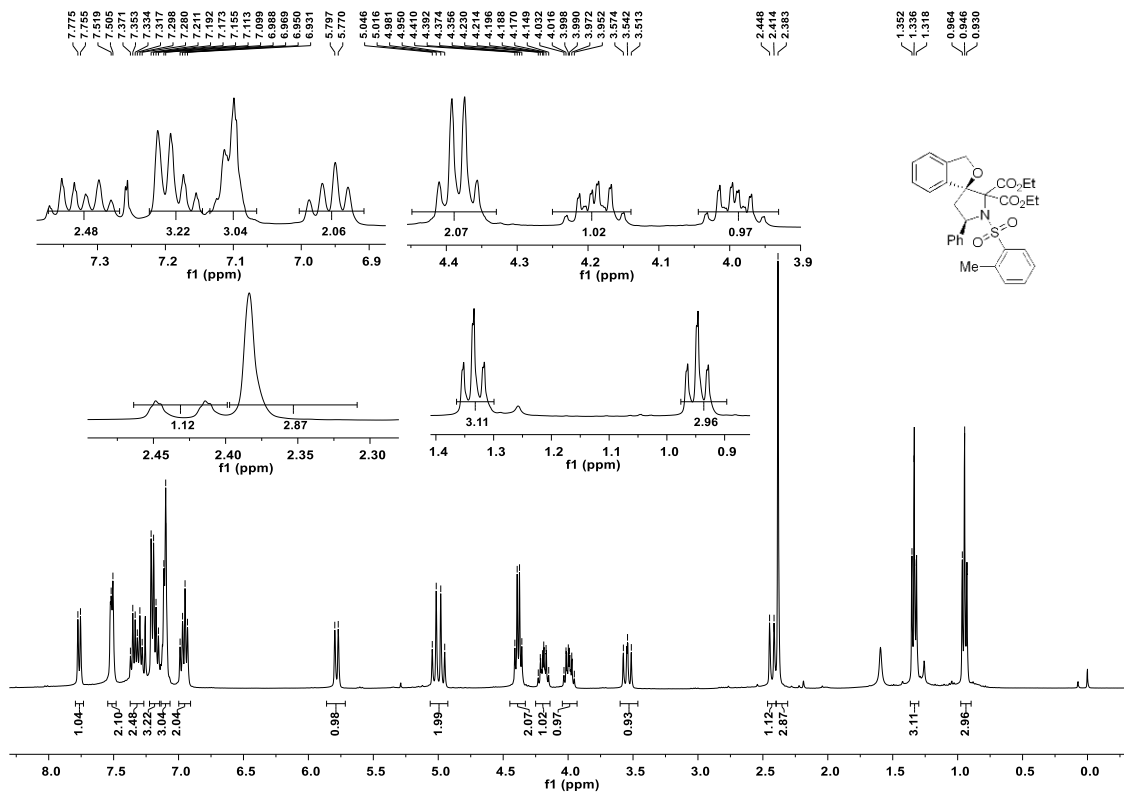

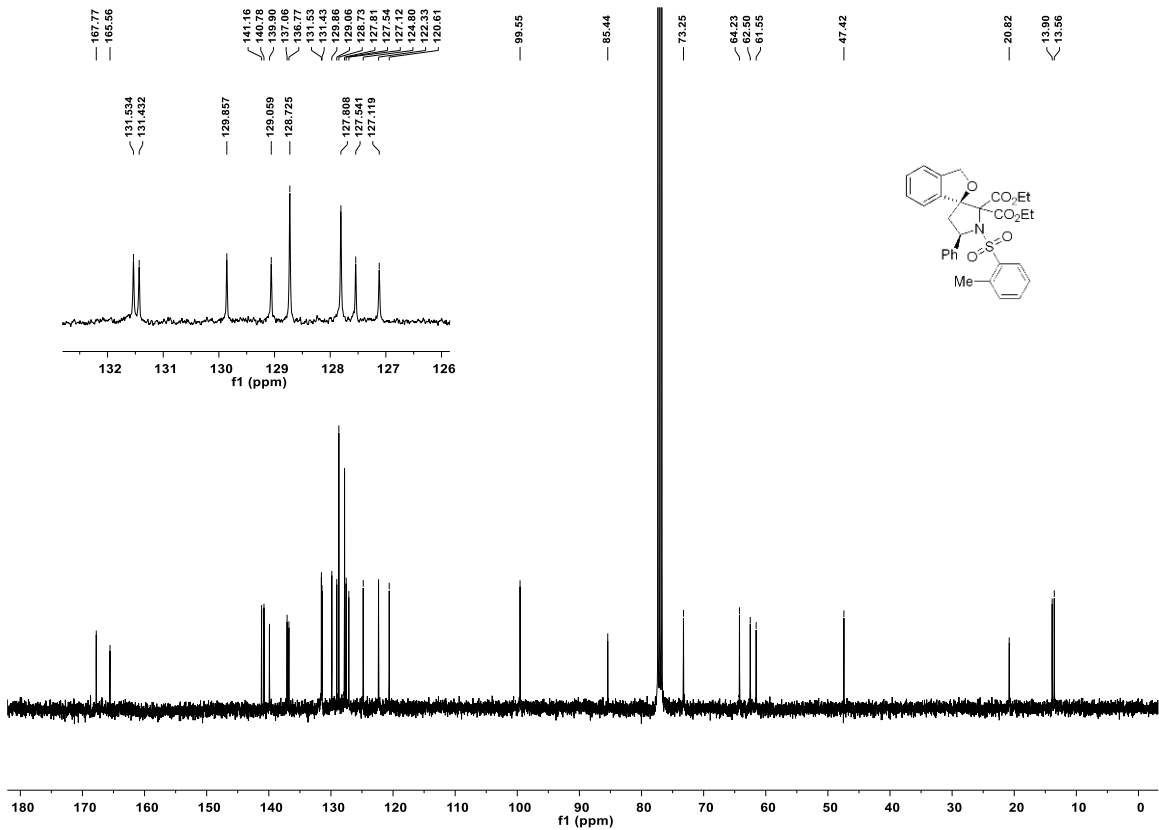

**Diethyl (1S,5'R)-1'-((4-chlorophenyl)sulfonyl)-5'-phenyl-3H-spiro[isobenzofuran-1,3'-pyrrolidine]-2',2'-dicarboxylate(3r)**

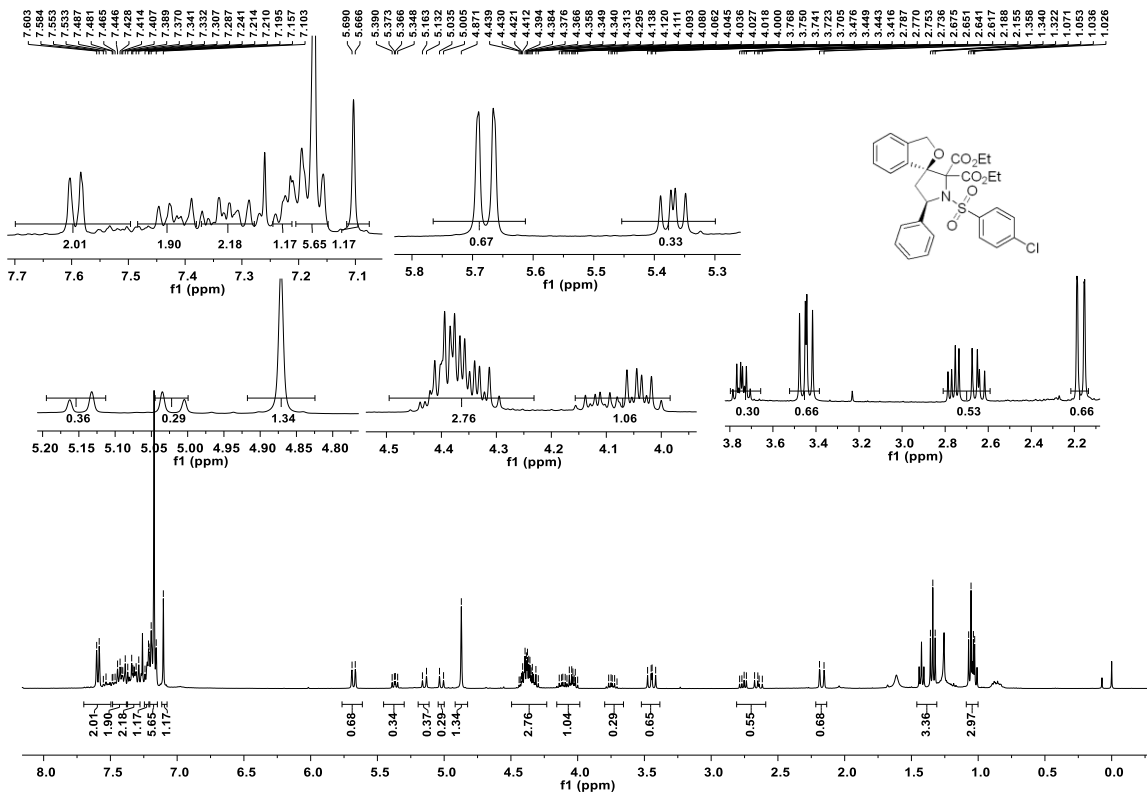

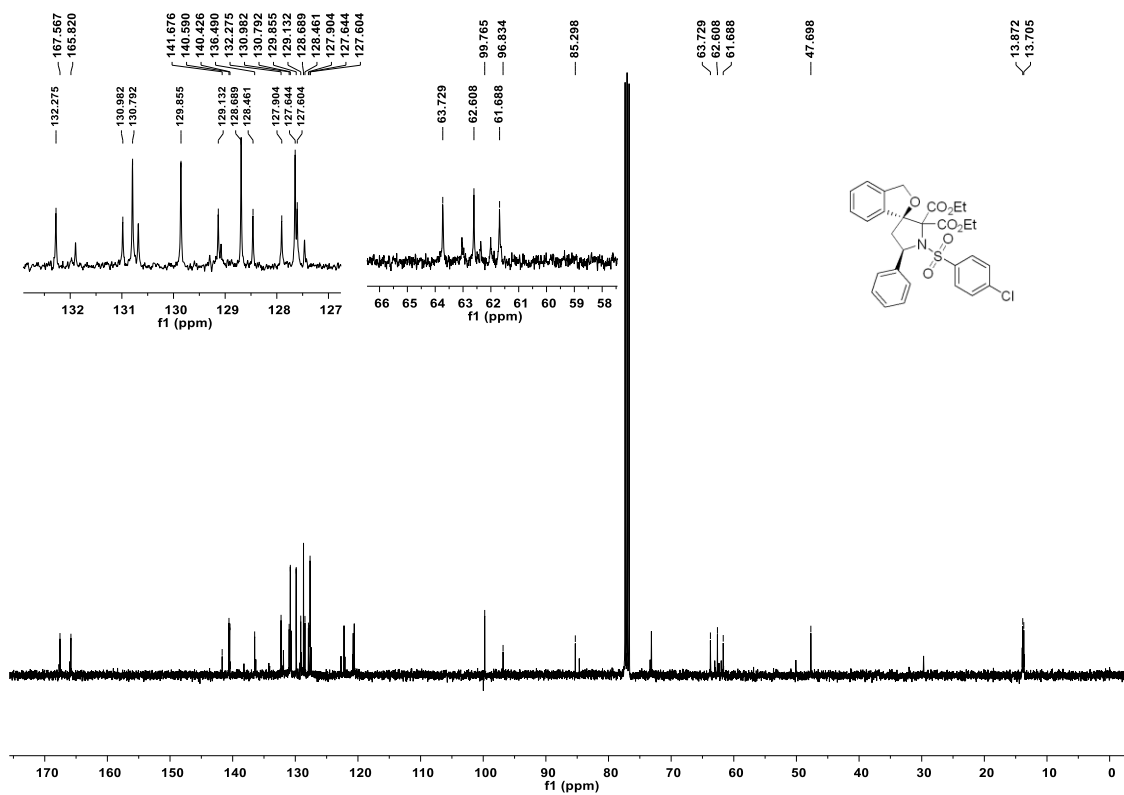

**Diethyl (1*S*,5'*R*)-5-fluoro-5'-phenyl-1'-(*o*-tolysulfonyl)-3*H*-spiro[isobenzofuran-1,3'-pyrrolidine]-2',2'-dicarboxylate (3s)**

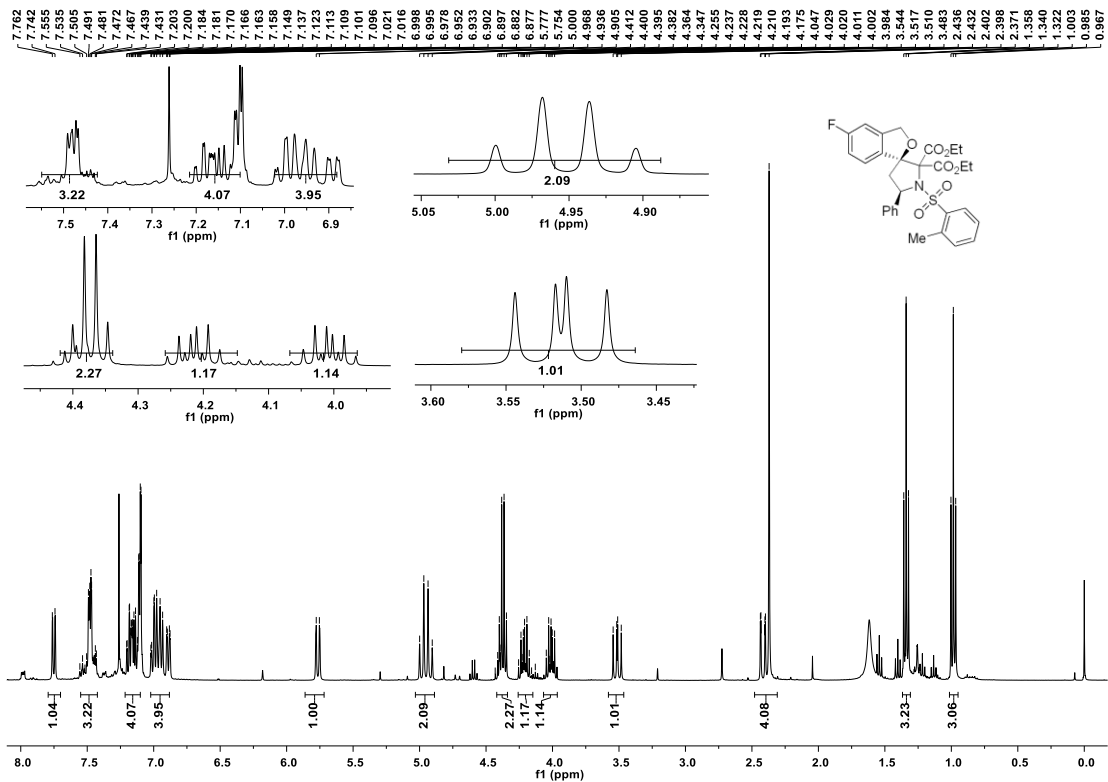

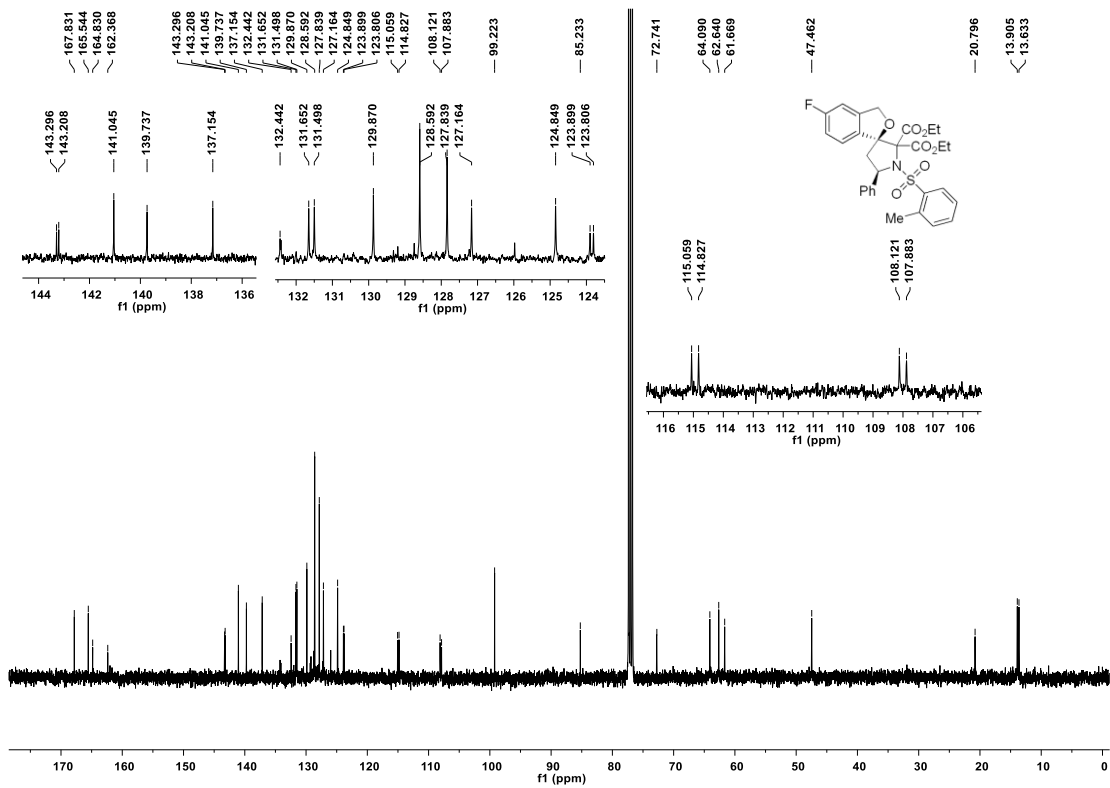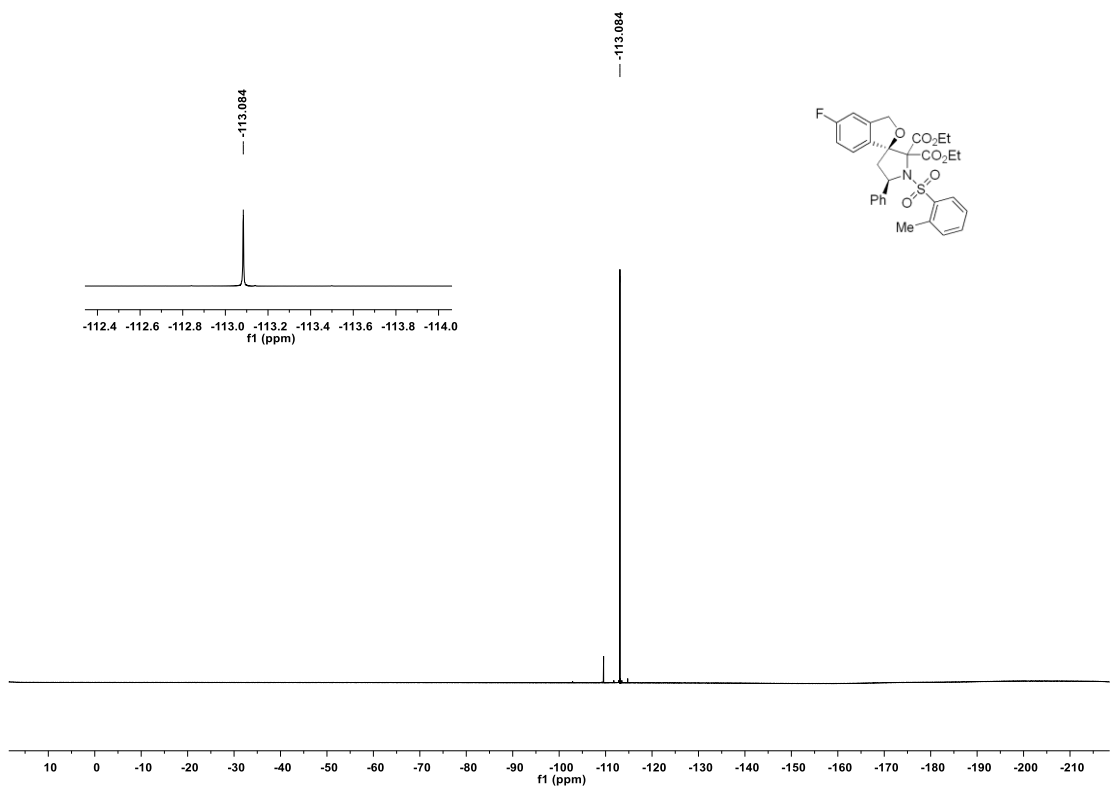

**Diethyl (1*S*,5'*R*)-6-methyl-5'-phenyl-1'-(*o*-tolylsulfonyl)-3*H*-spiro[isobenzofuran-1,3'-pyrrolidine]-2',2'-dicarboxylate (3t)**

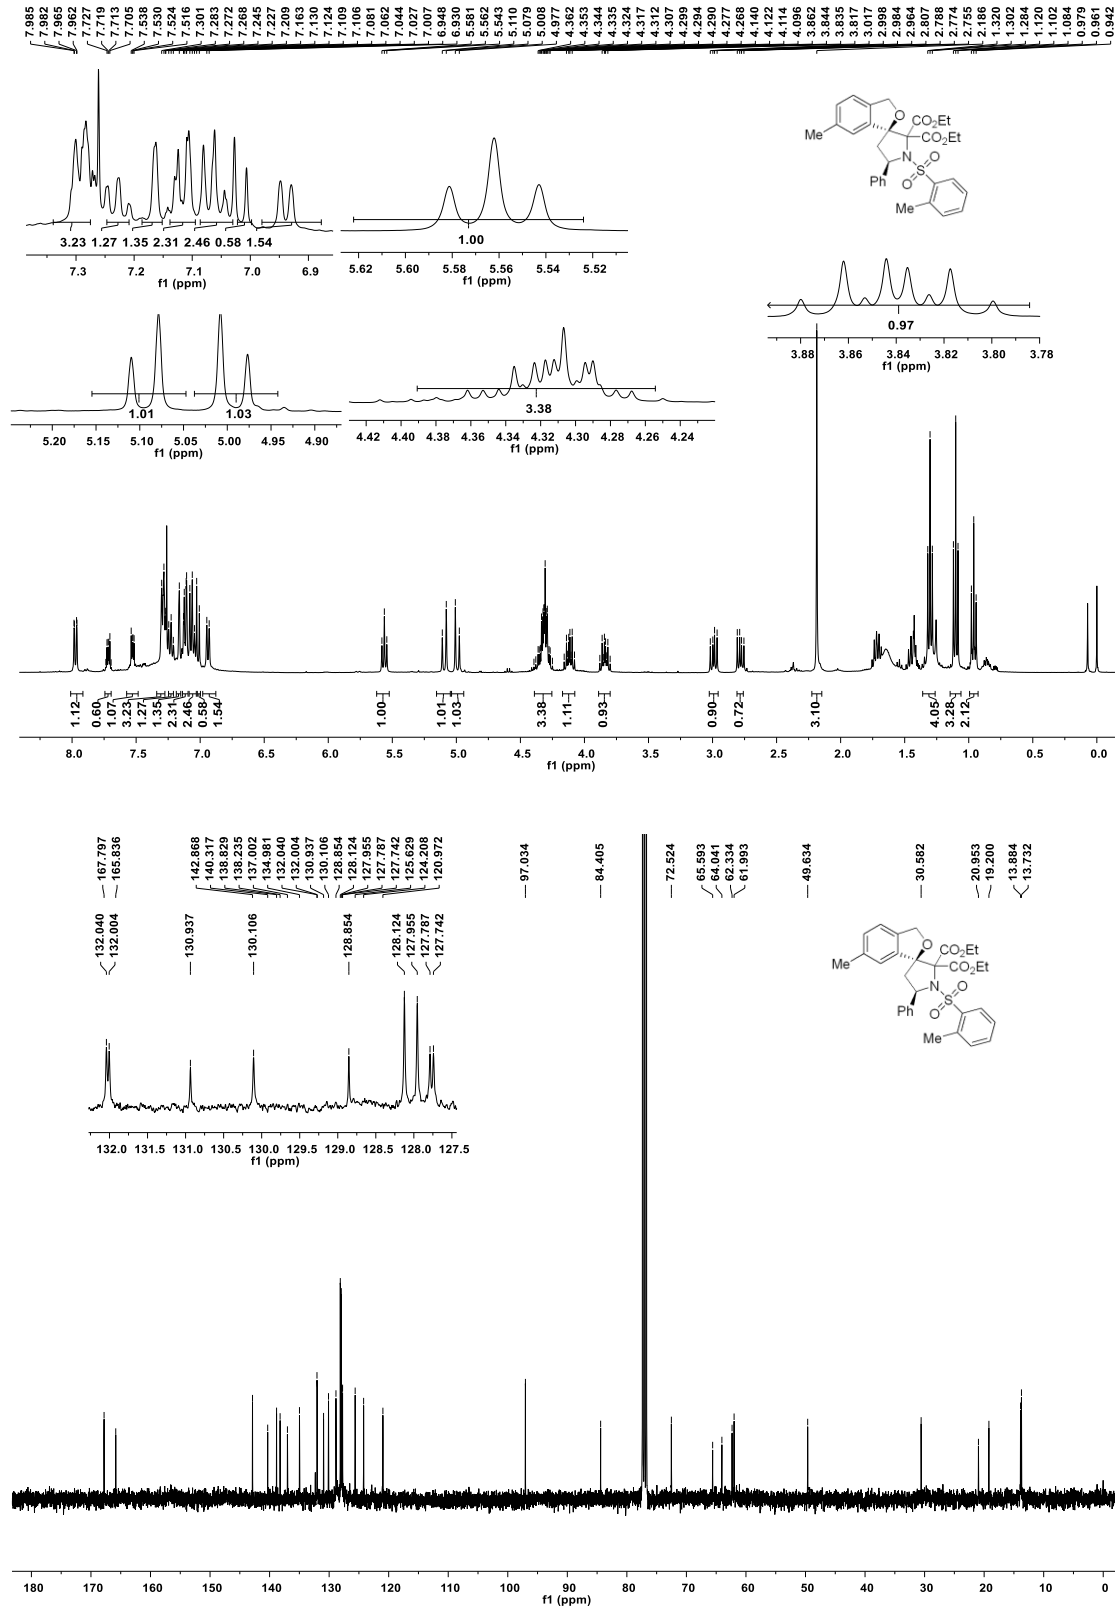



**Diethyl (1*S*,5'*R*)-5-chloro-5'-phenyl-1'-(*o*-tolylsulfonyl)-3*H*-spiro[isobenzofuran-1,3'-pyrrolidine]-2',2'-dicarboxylate (3u)**

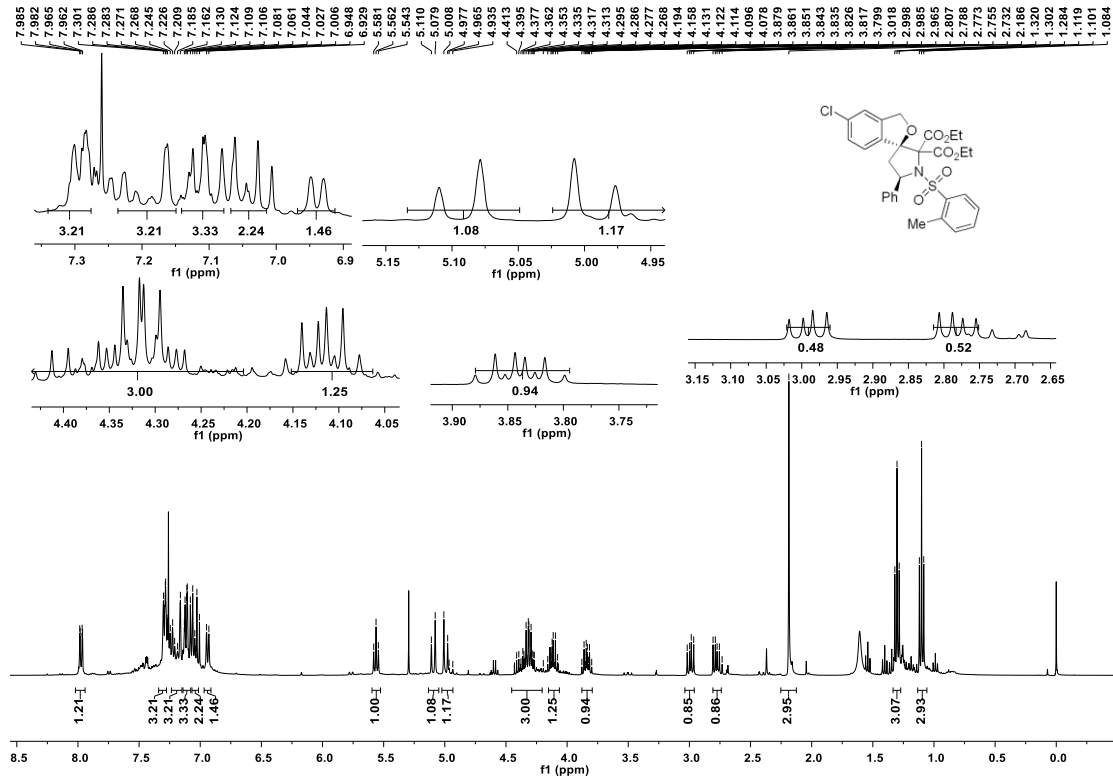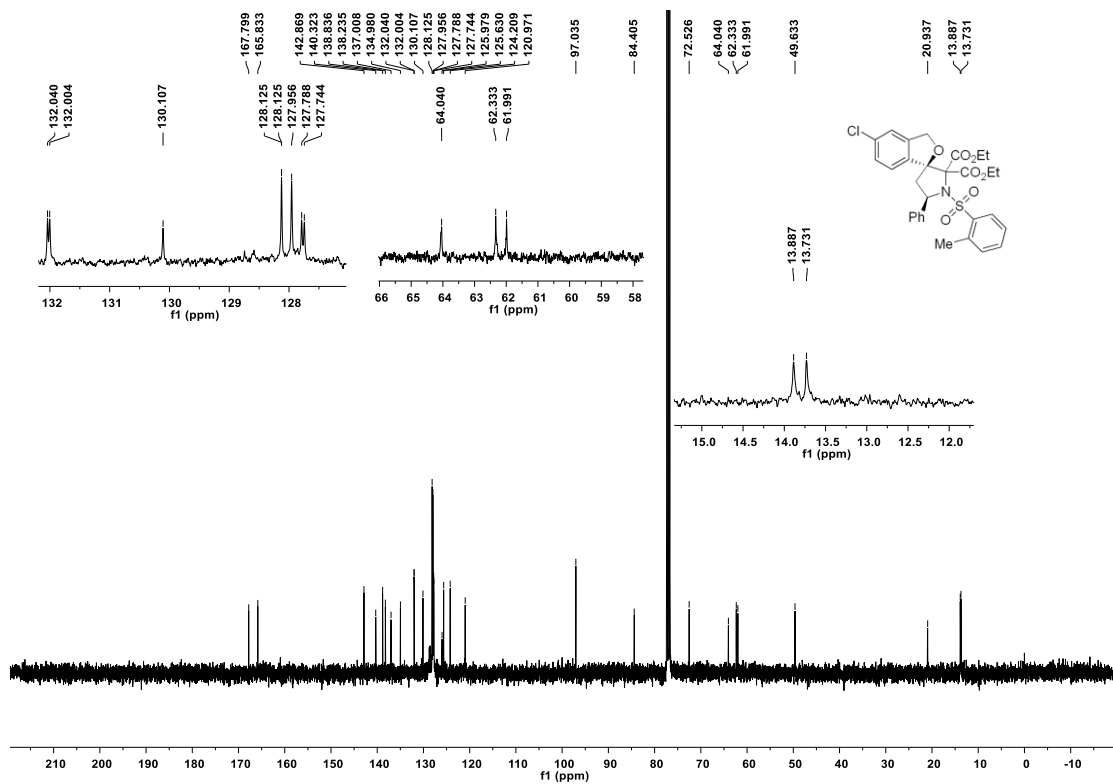

(L) Copies of CD spectra

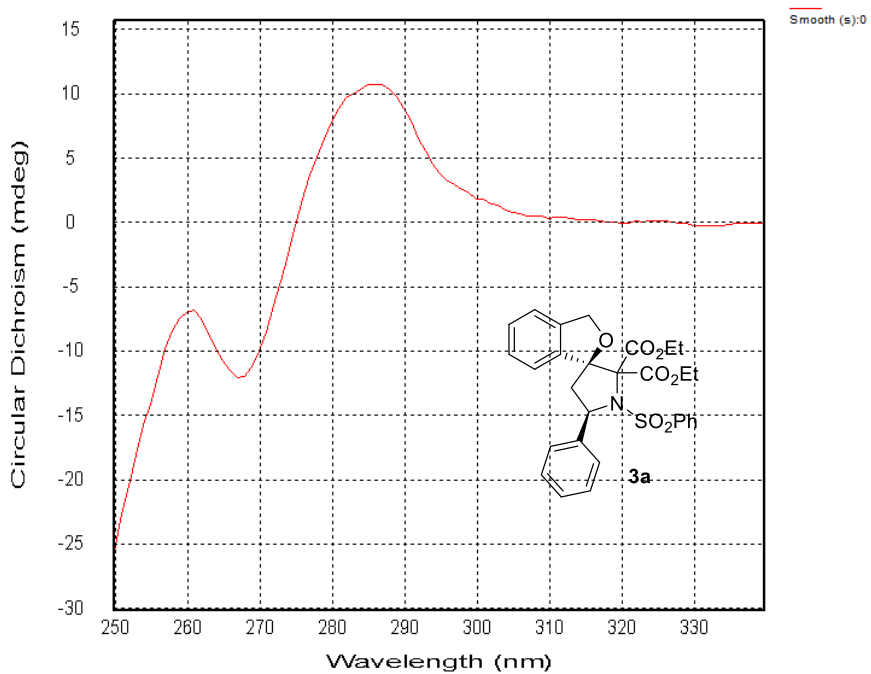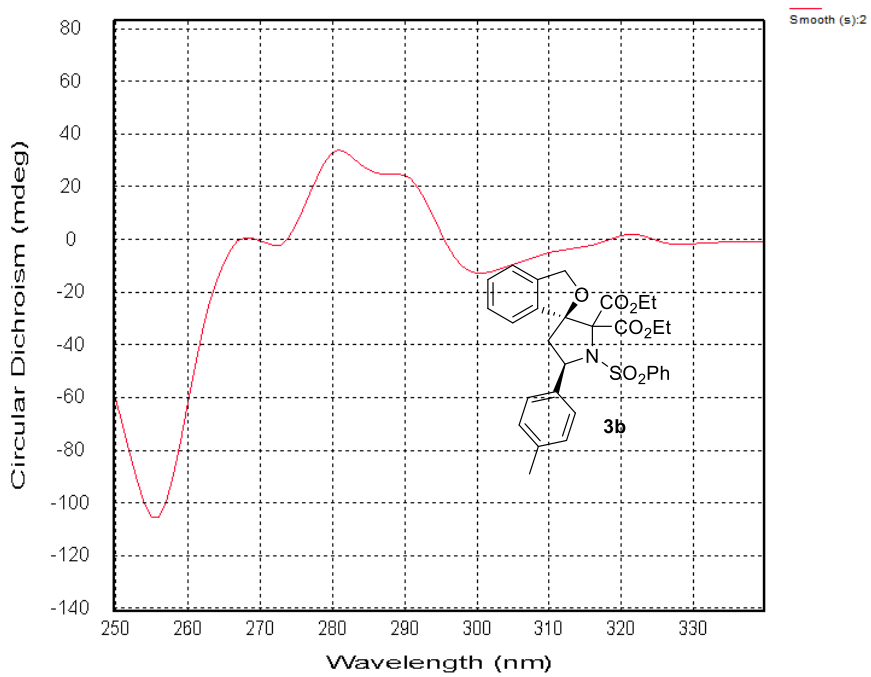

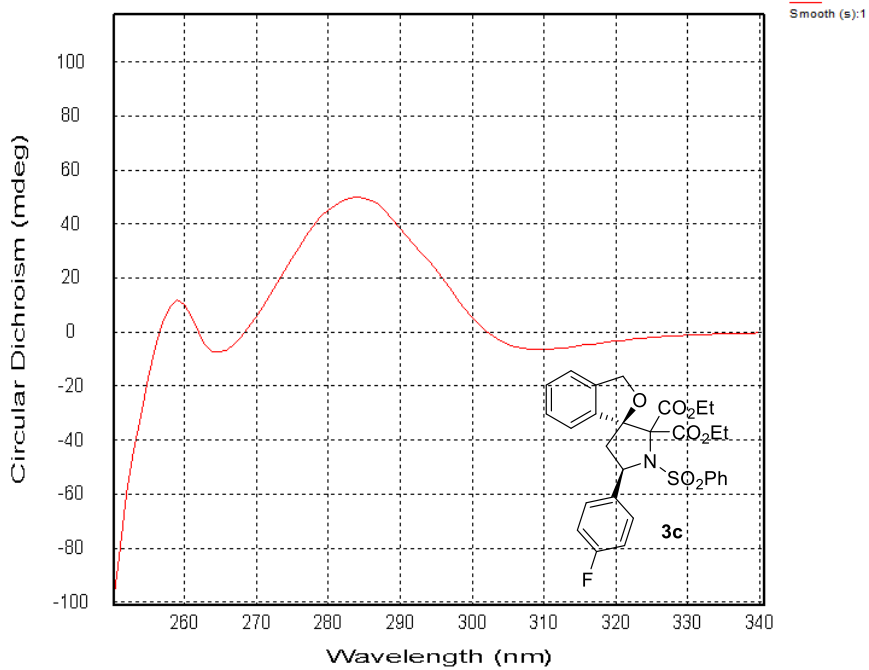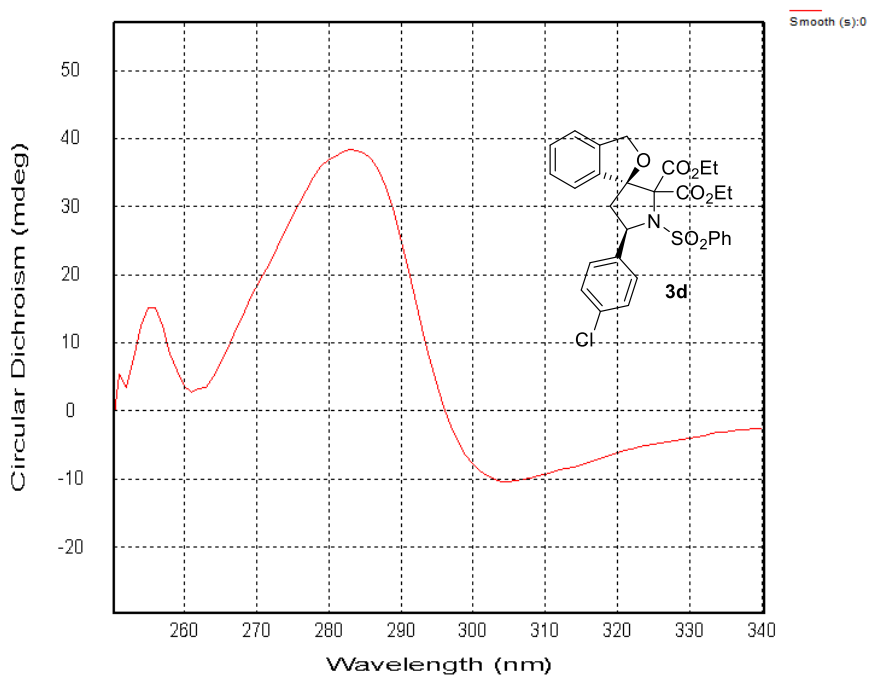

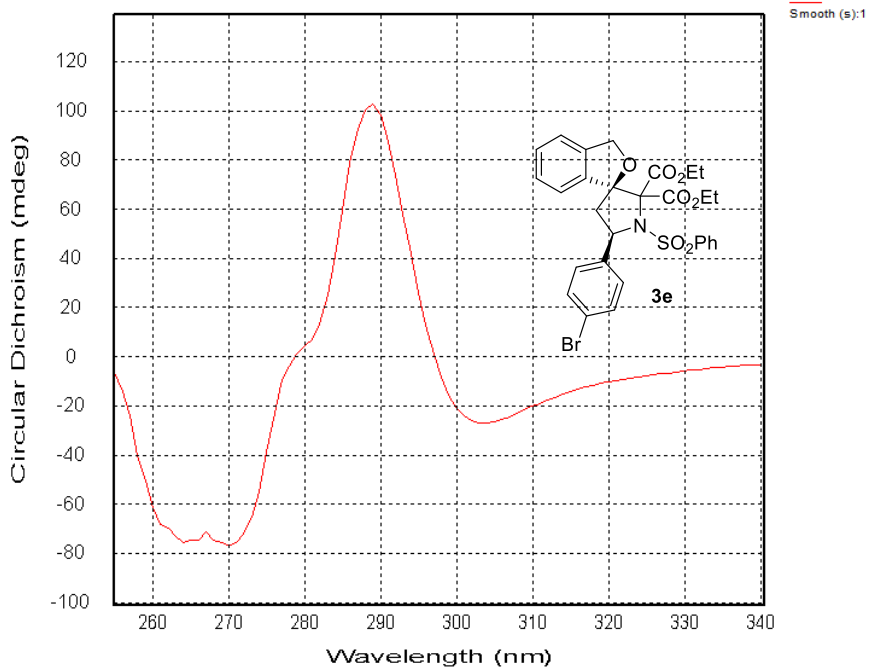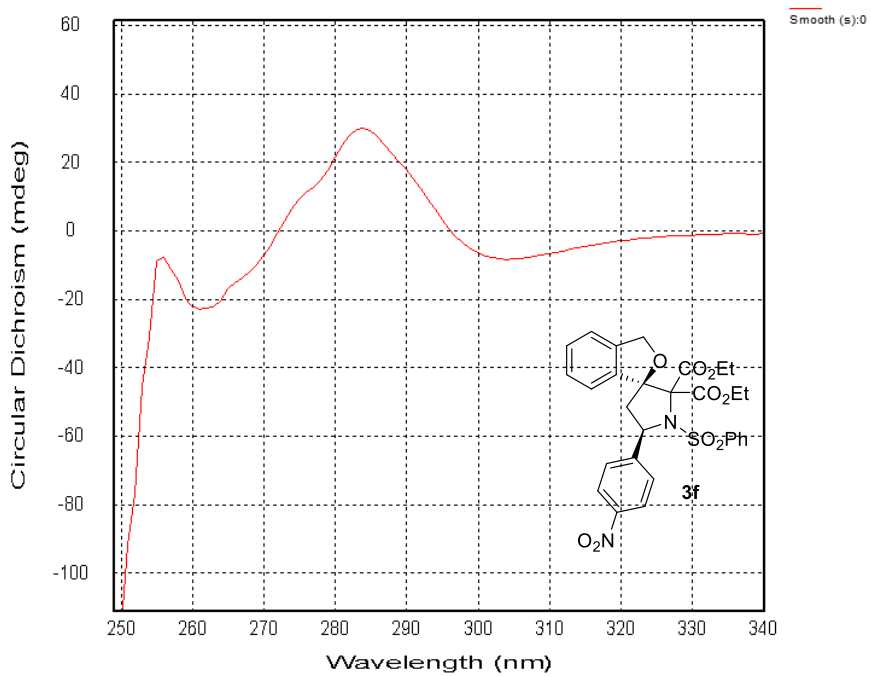

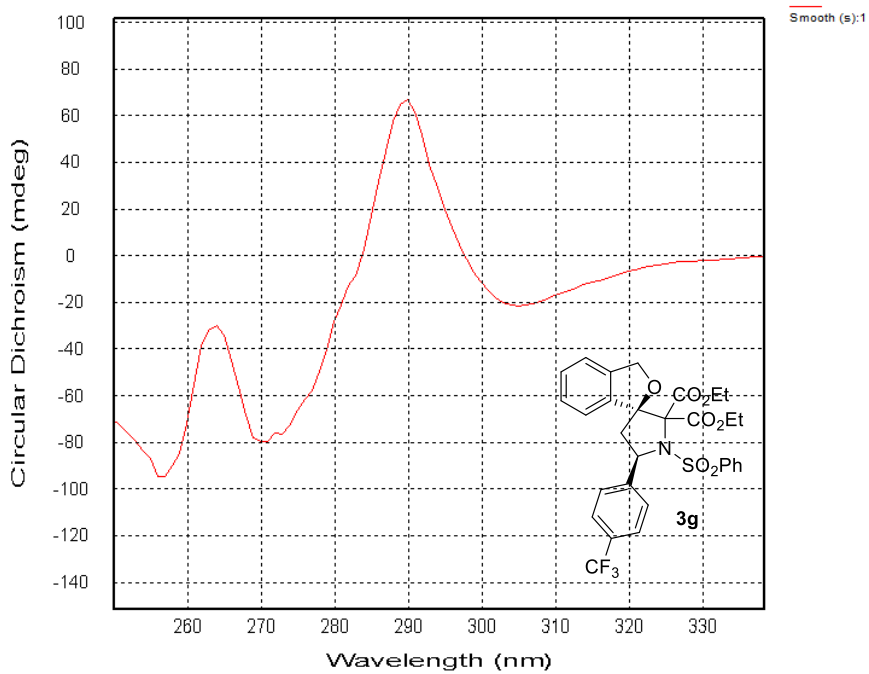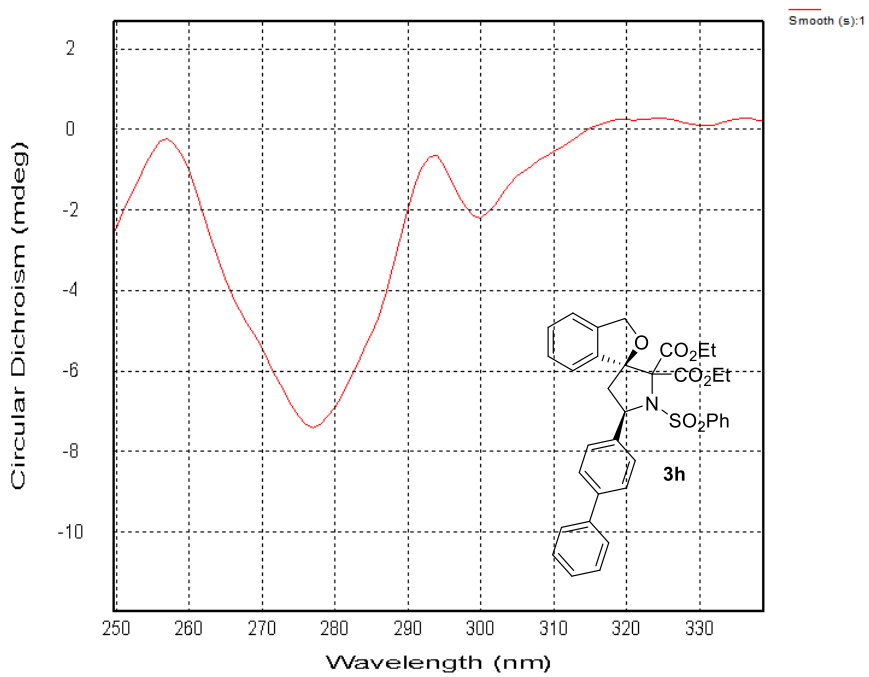

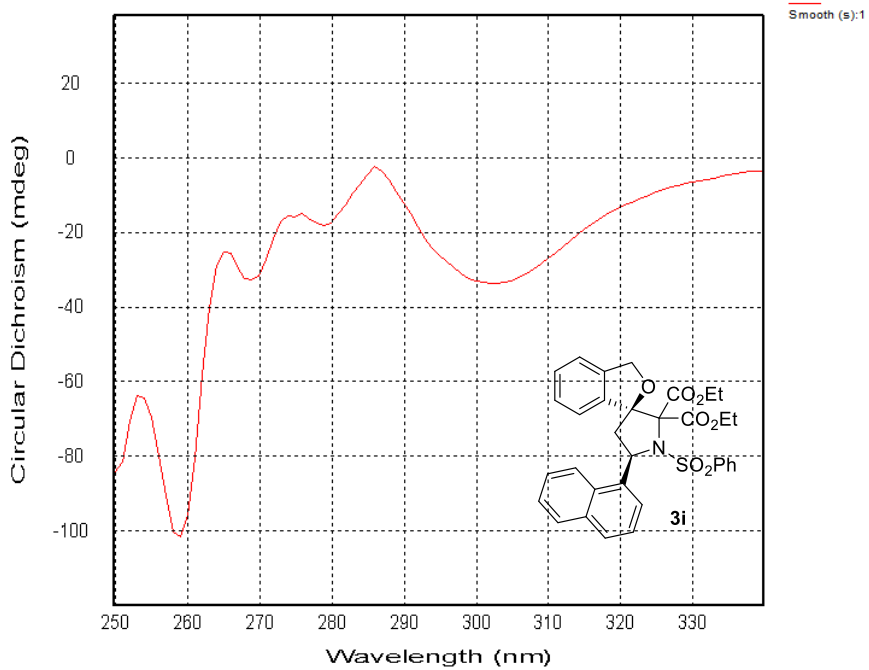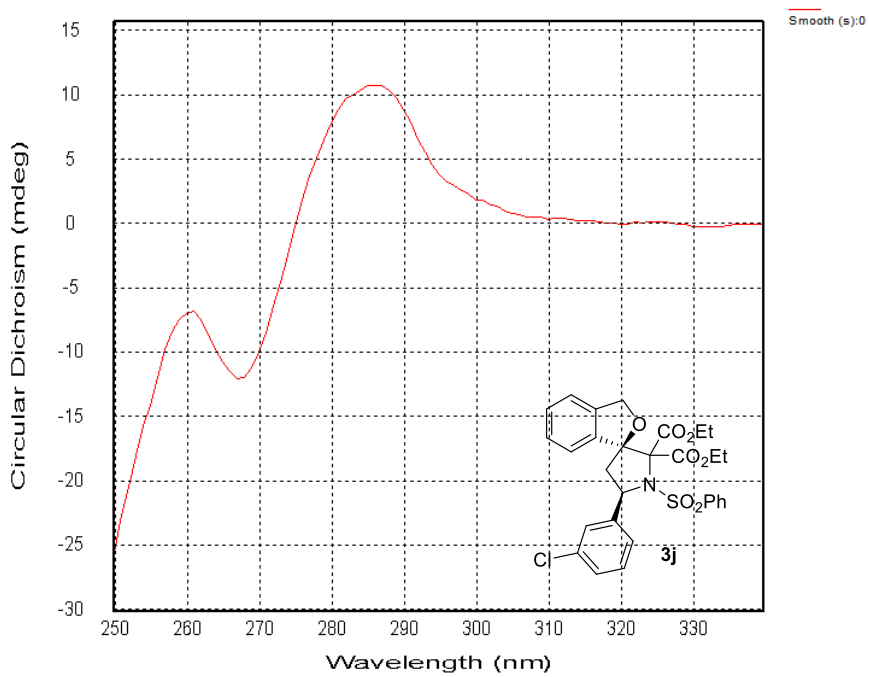

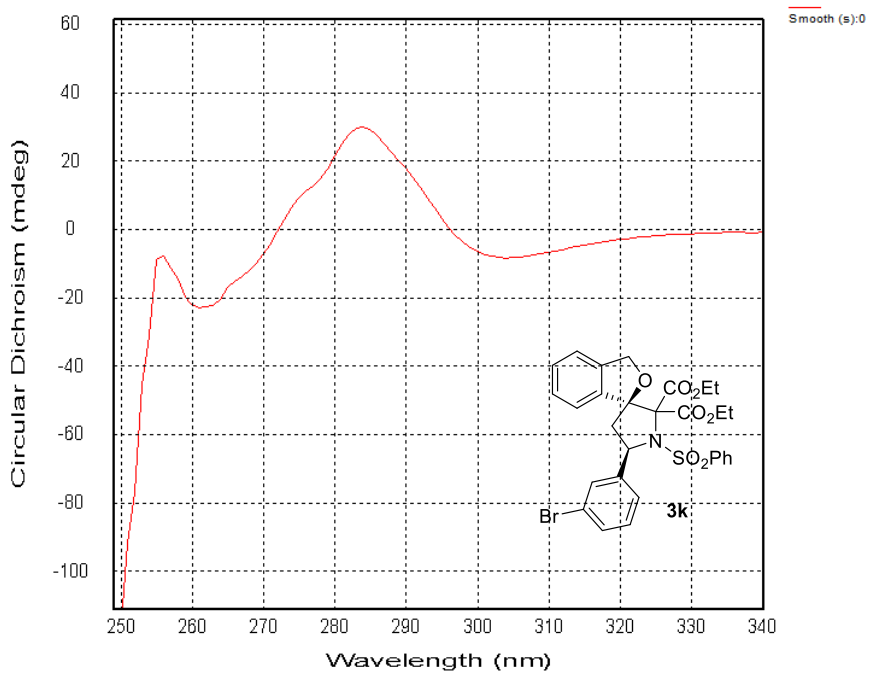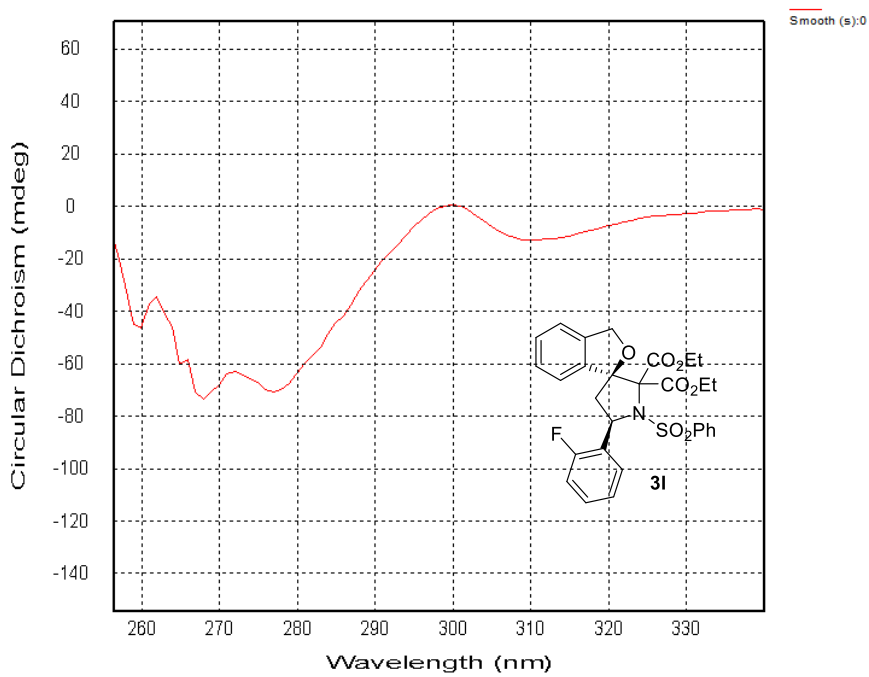

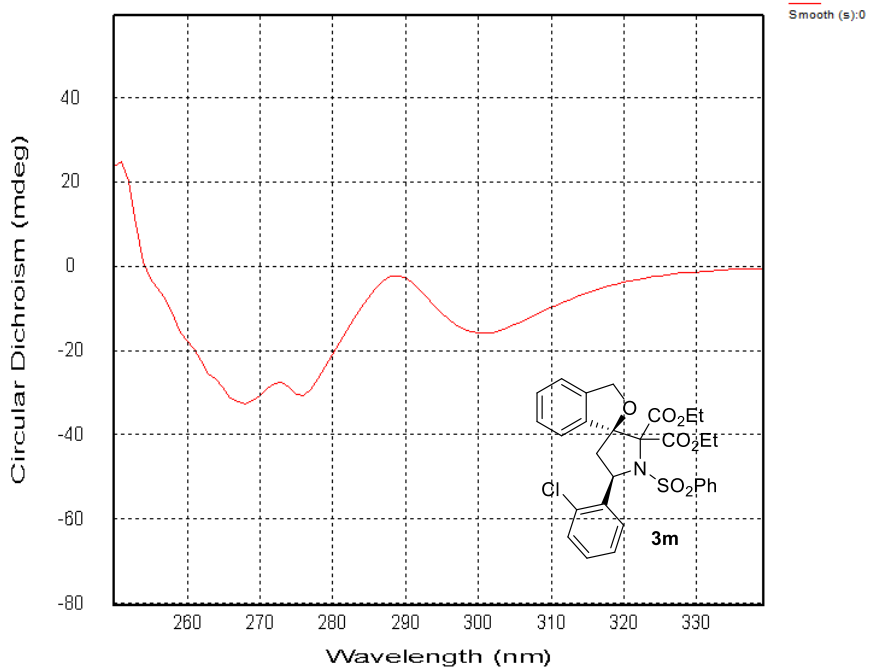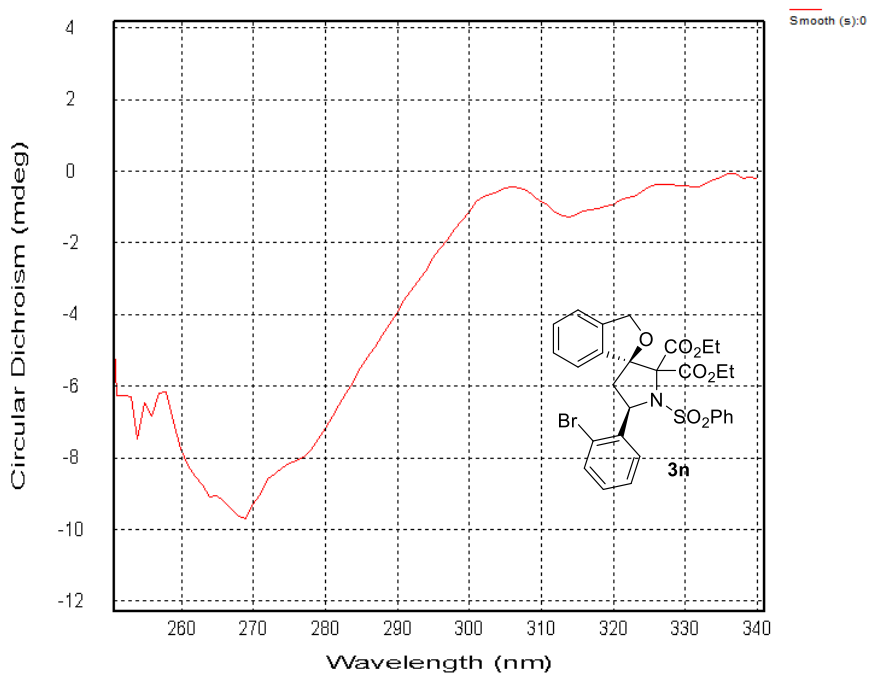



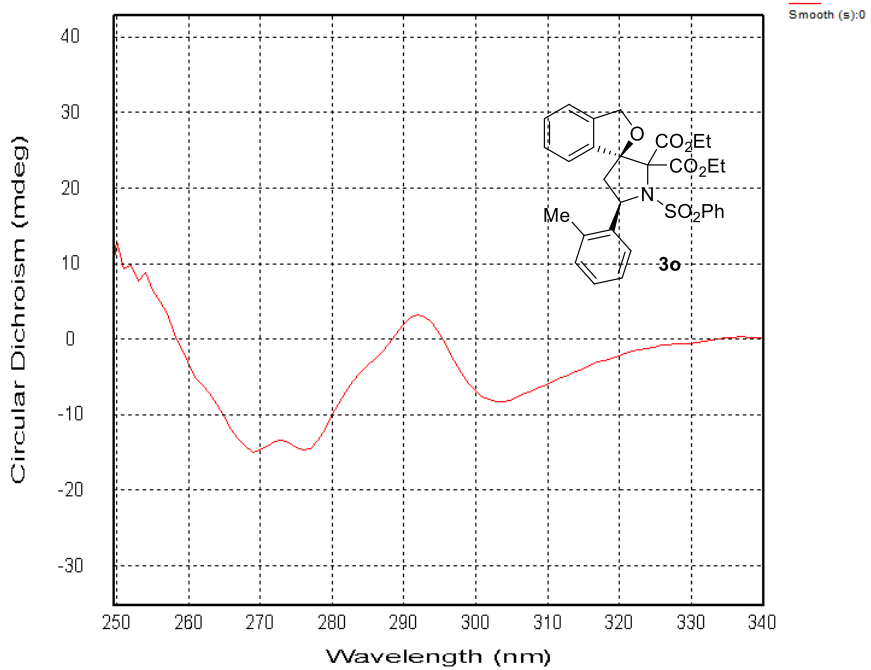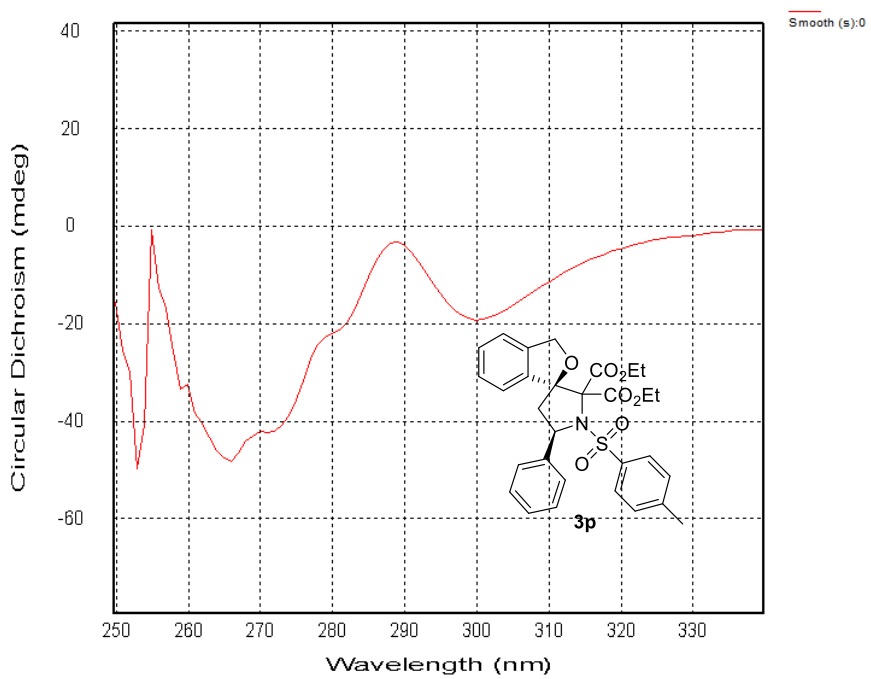

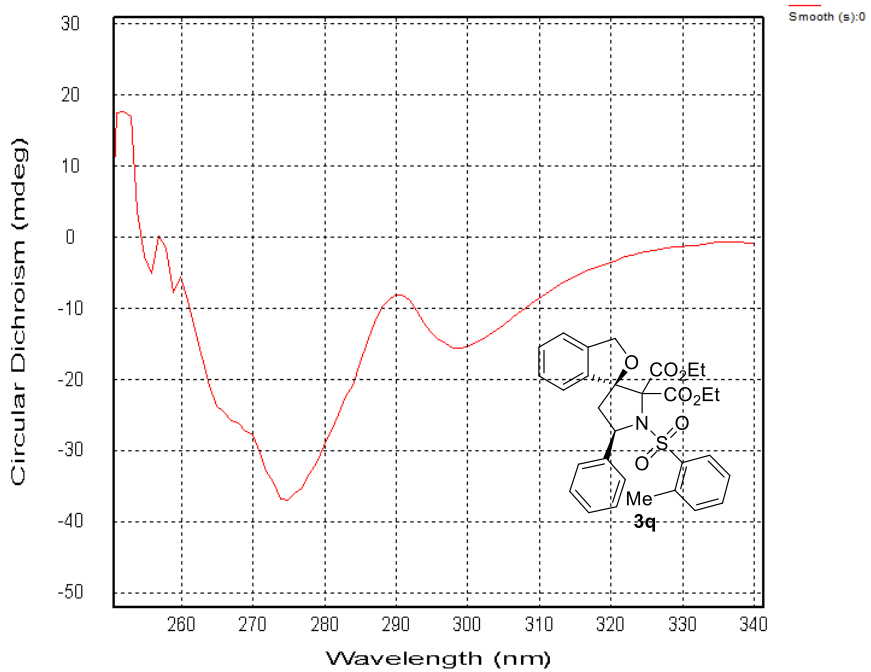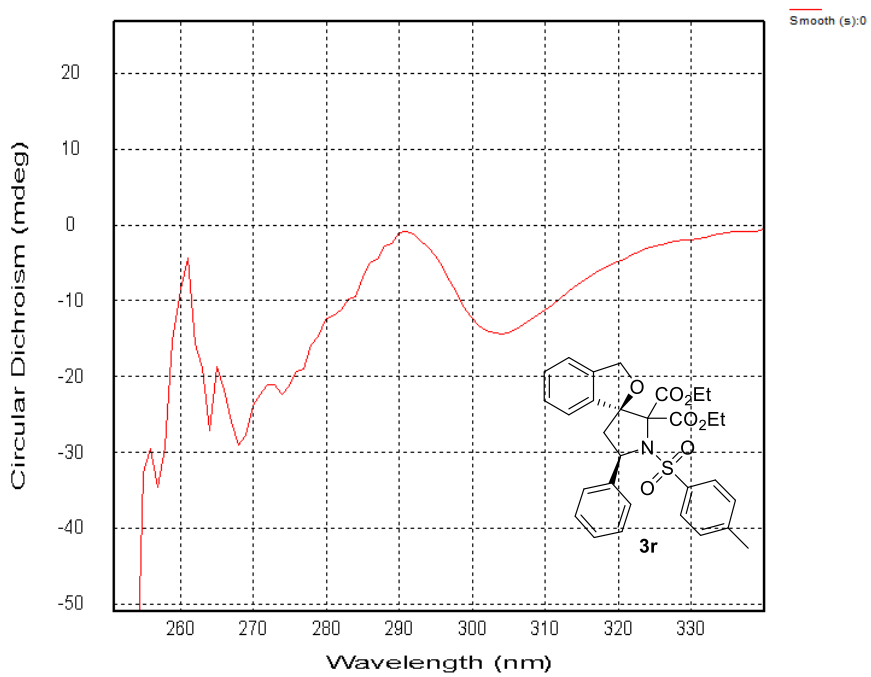

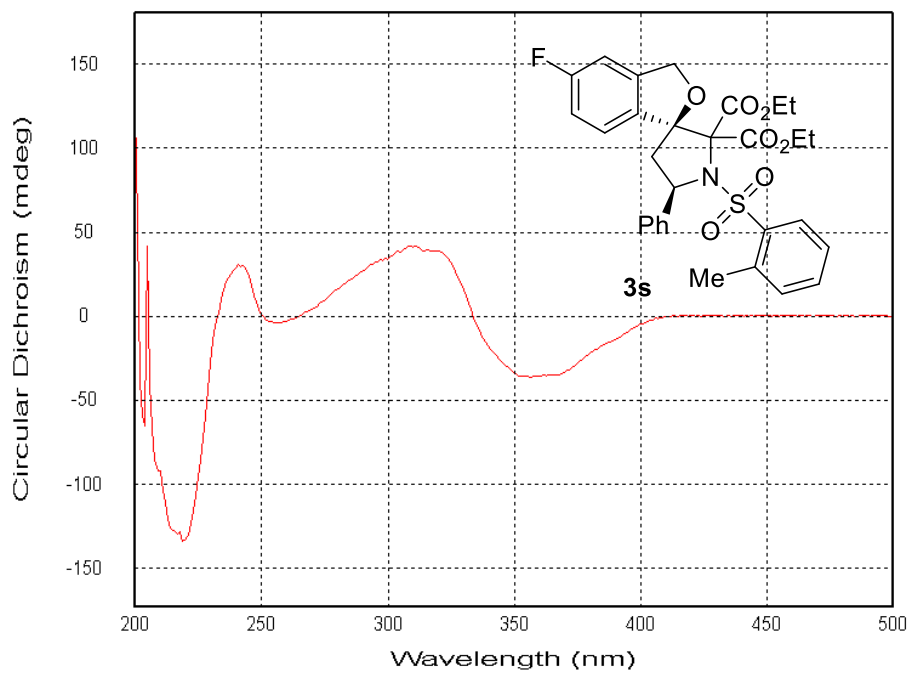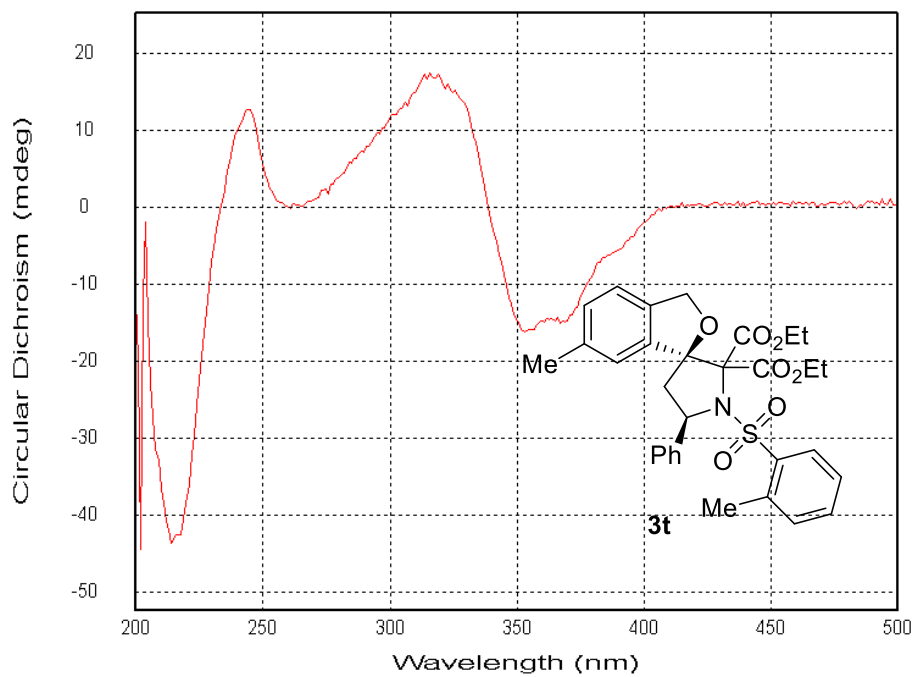

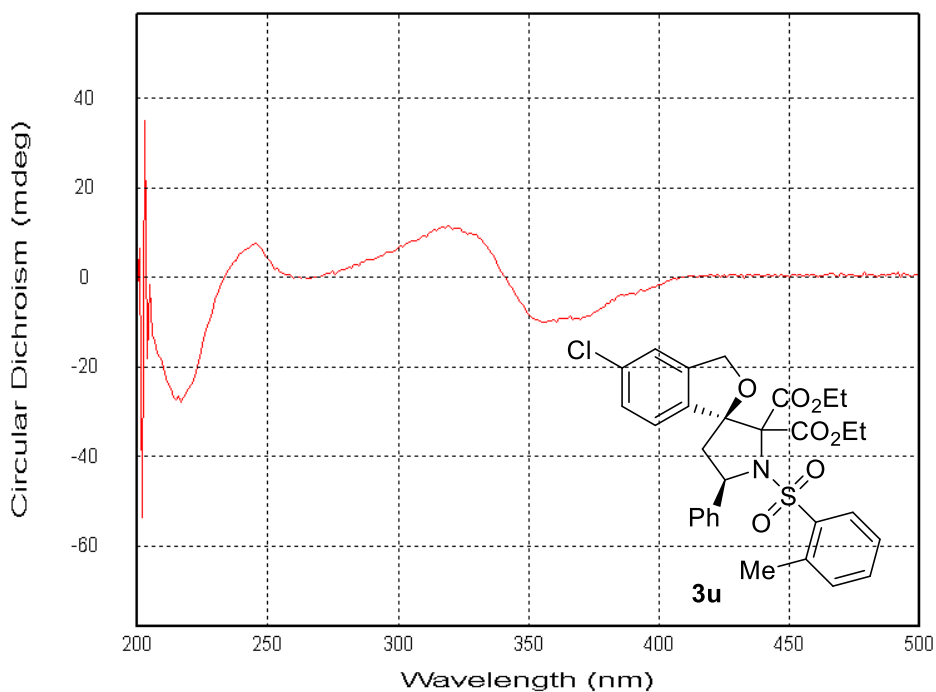

#### (M) Supplementary reference

1. (a) K. Y. Lee, C. G. Lee and J. N. Kim, *Tetrahedron Lett.* **2003**, 44, 1231; (b) D. J. Dong, H. H. Li and S. K. Tian, *J. Am. Chem. Soc.* **2010**, 132, 5018.
2. For the synthesis of chiral *N,N'*-dioxide ligands, see: (a) X. H. Liu, L. L. Lin and Feng, X. M. Chiral *N, N'*-dioxides: New Ligands and Organocatalysts for Catalytic Asymmetric reactions. *Acc. Chem. Res.*, **2011**, 44, 574; (b) X. H. Liu, L. L. Lin and X. M. Feng, Chiral *N,N'*-dioxides: Synthesis, Coordination Chemistry and Asymmetric Catalysis. *Org. Chem. Front.*, **2014**, 1, 298.
3. For the preparation of the aziridines: (a) X. Wu, L. Li. And J. L. Zhang, *Adv. Synth. Catal.*, **2012**, 354, 3485; (b) R. H. Fan and Y. Ye, *Adv. Synth. Catal.*, **2008**, 350, 1526; (c) Y. T. Liao, X. H. Liu, Y. Zhang, Y. L. Xu, Y. Xia, L. L. Lin and X. M. Feng, *Chem. Sci.*, **2016**, 7, 3775.
4. For the preparation of alkynyl alcohols and amides: (a) W, H.; H, Y. P; G, L. Z. *Org. Lett.*, **2013**, 15, 2234; (b) X. H. W, S. L. D, Z. L. Y, L. F, P. Daka, H. W, Z. H. Xu, *Org. Lett.*, **2014**, 16, 22.
